# Supplementary material for: Synthesis and Evaluation of N-(3-Trifluoroacetyl-indol-7-yl) Acetamides for Potential In Vitro Antiplasmodial Properties
Source: PubMed Central journal article supplement (PMC6152062; doi:10.3390/molecules22071099), 2017-07-02
Supplement: molecules-22-01099-s001.pdf [file molecules-22-01099-s001.pdf]

1 **Supplementary information for,**  
2 **Synthesis and Evaluation of the *N*-(3-trifluoroacetylindol-**  
3 **7-yl)acetamides for potential *in vitro* antiplasmodial**  
4 **properties**

5  
6 M.J. Mphahlele, M.M. Mmonwa and Y.S. Choong

7  
8  
9  
10  
11  
12  
13  
14  
15  
16  
17  
18  
19

- Supplementary 1:** Copies of  $^1\text{H}$ - and  $^{13}\text{C}$  NMR spectra of compounds 2–4 and  $^{19}\text{F}$  NMR spectra of compounds 4
- Supplementary 2:** % cell viability and  $\text{LC}_{50}$  values of chloroquine and compounds 3 and 4
- Supplementary 3:** % cell viability of Vero cells exposed Doxorubicin chloride, 3a, 3f, 4a and 4g
- Supplementary 4:** Crystal data and structure refinement, bond lengths and torsion angles of 4g

20 **Supplementary 1:  $^1\text{H}$ - and  $^{13}\text{C}$ -NMR Spectra of Compounds 2–4 and  $^{19}\text{F}$  NMR spectra of compounds 4**  
21

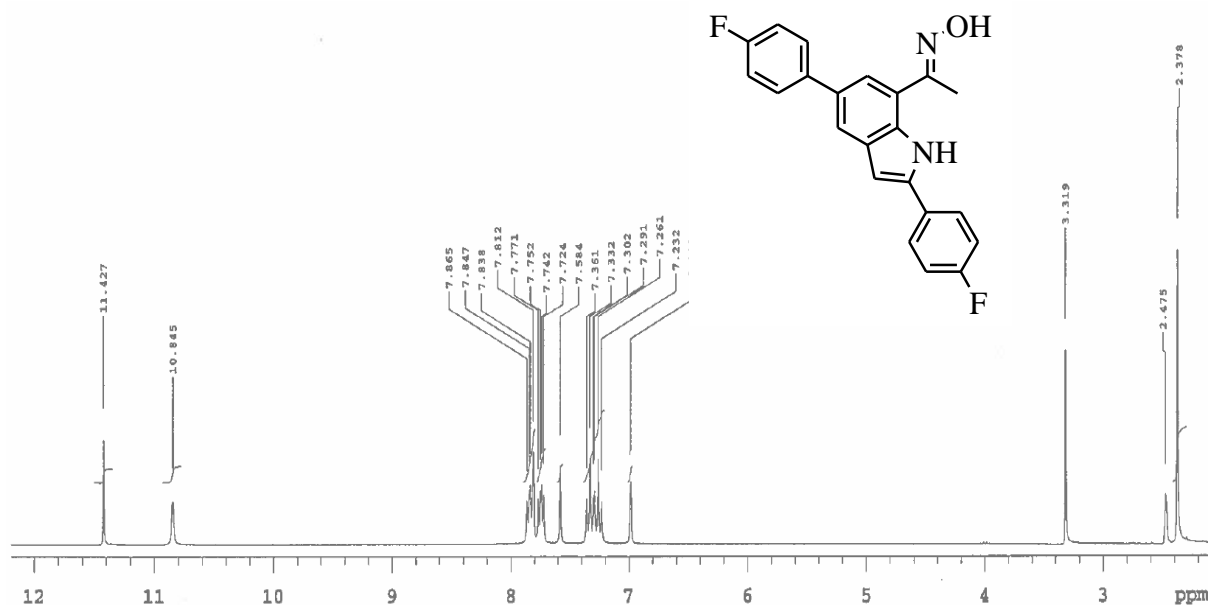

22

23 **Figure S1.  $^1\text{H}$  NMR Spectrum of Compound 2a DMSO- $d_6$  at 300 MHz**

24

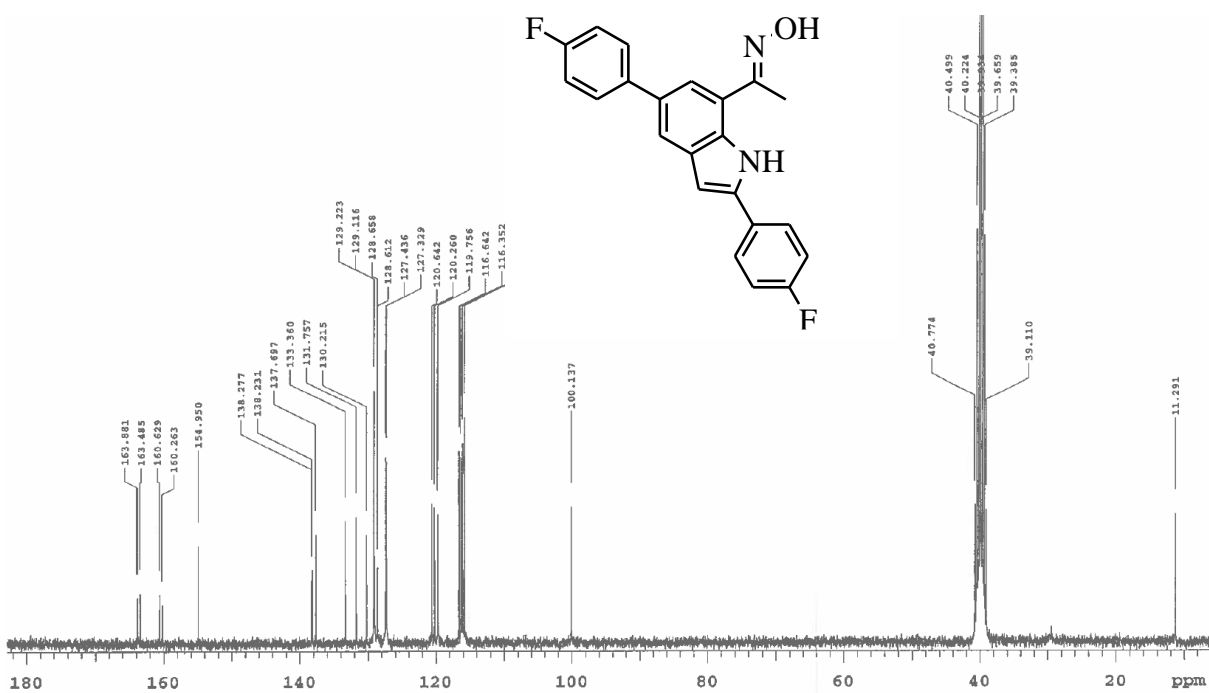

25

26 **Figure S2.  $^{13}\text{C}$  NMR Spectrum of Compound 2a in DMSO- $d_6$  at 75 MHz**

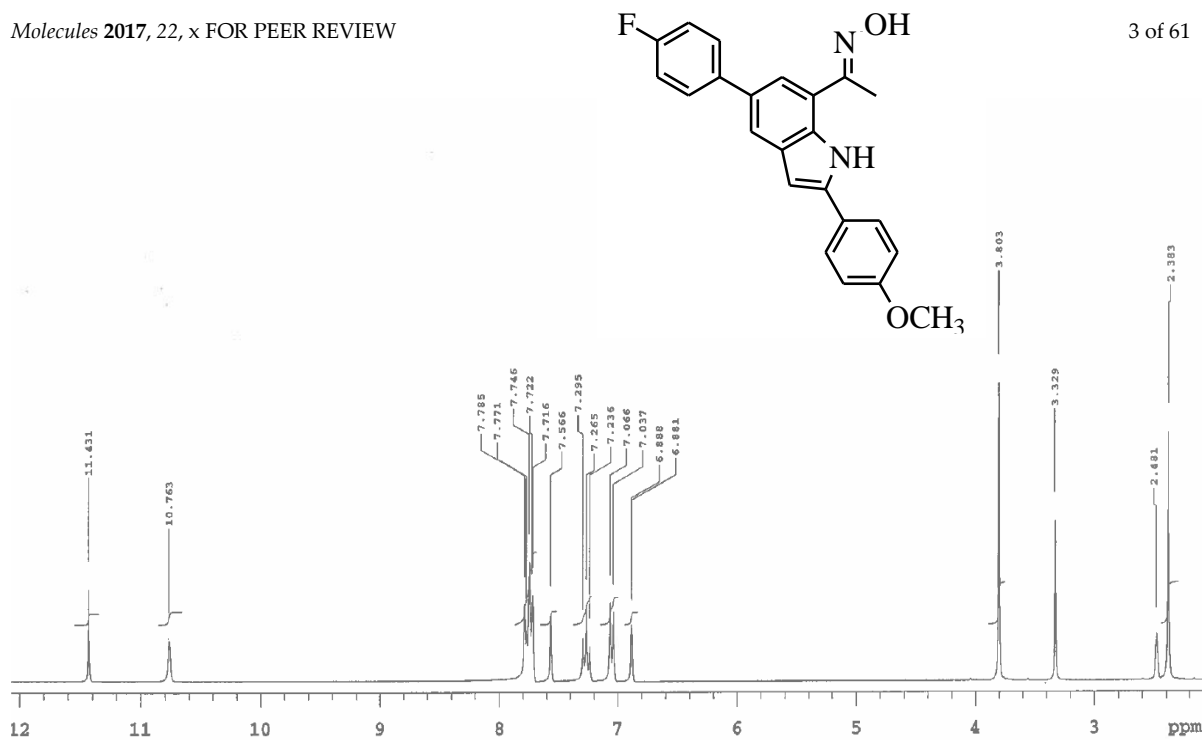

27

28 Figure S3.  $^1\text{H}$  NMR Spectrum of Compound 2b in  $\text{DMSO-}d_6$  at 300 MHz

29

30

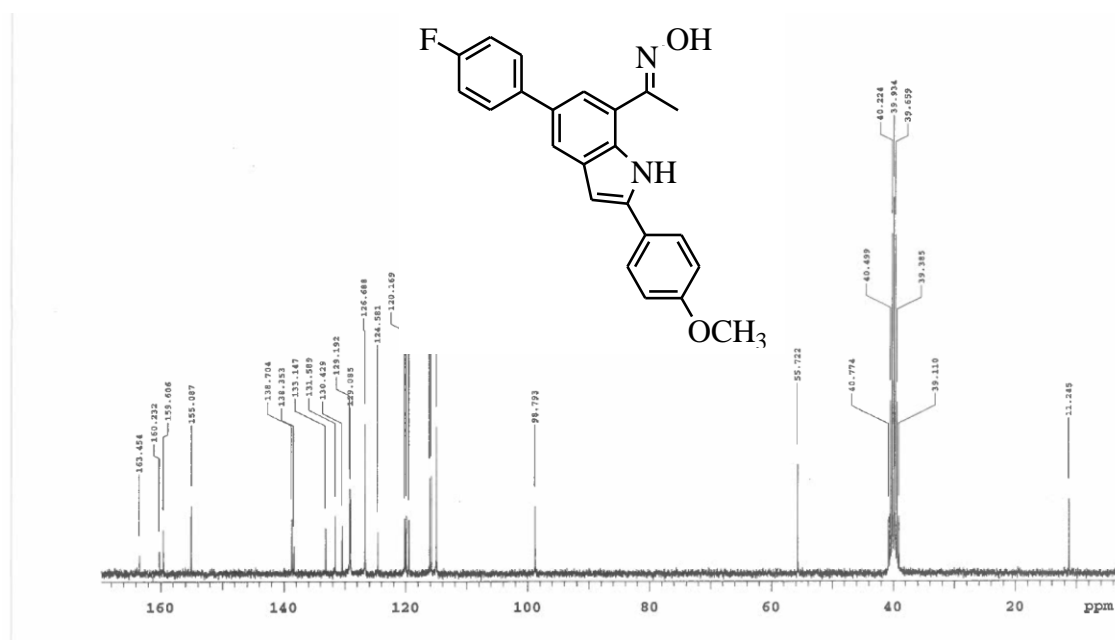

31

32 Figure S4.  $^{13}\text{C}$  NMR Spectrum of Compound 2b in  $\text{DMSO-}d_6$  at 75 MHz

33

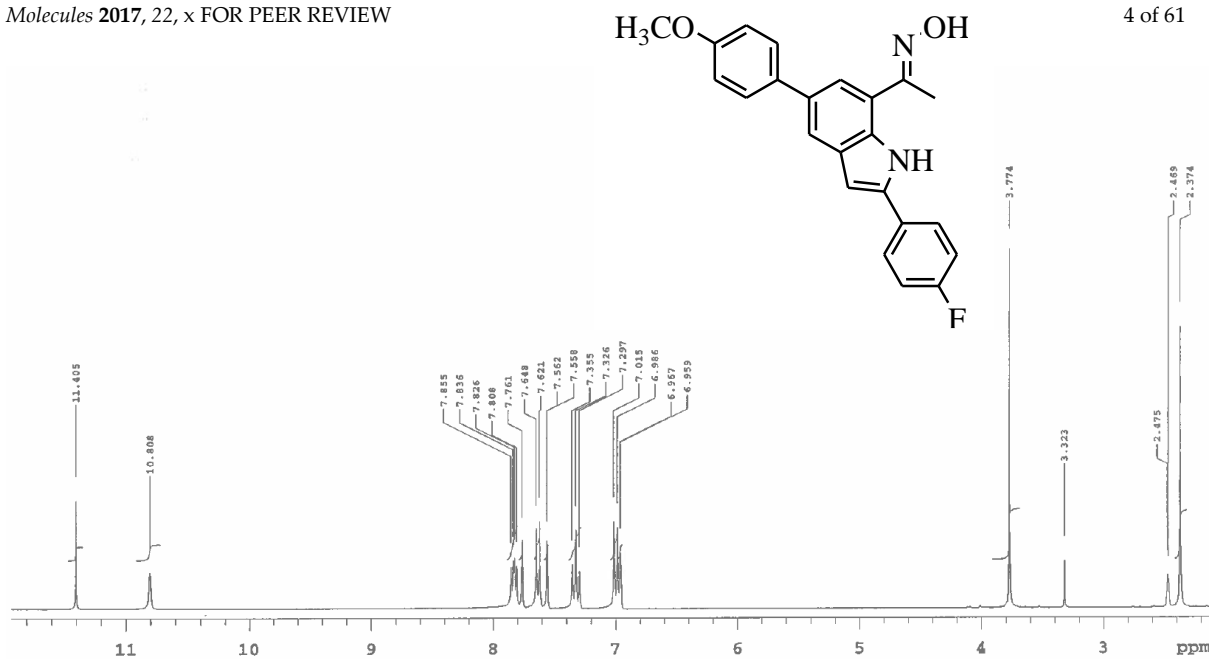

34

35 Figure S5. <sup>1</sup>H NMR Spectrum of Compound 2c in DMSO-*d*<sub>6</sub> at 300 MHz

36

37

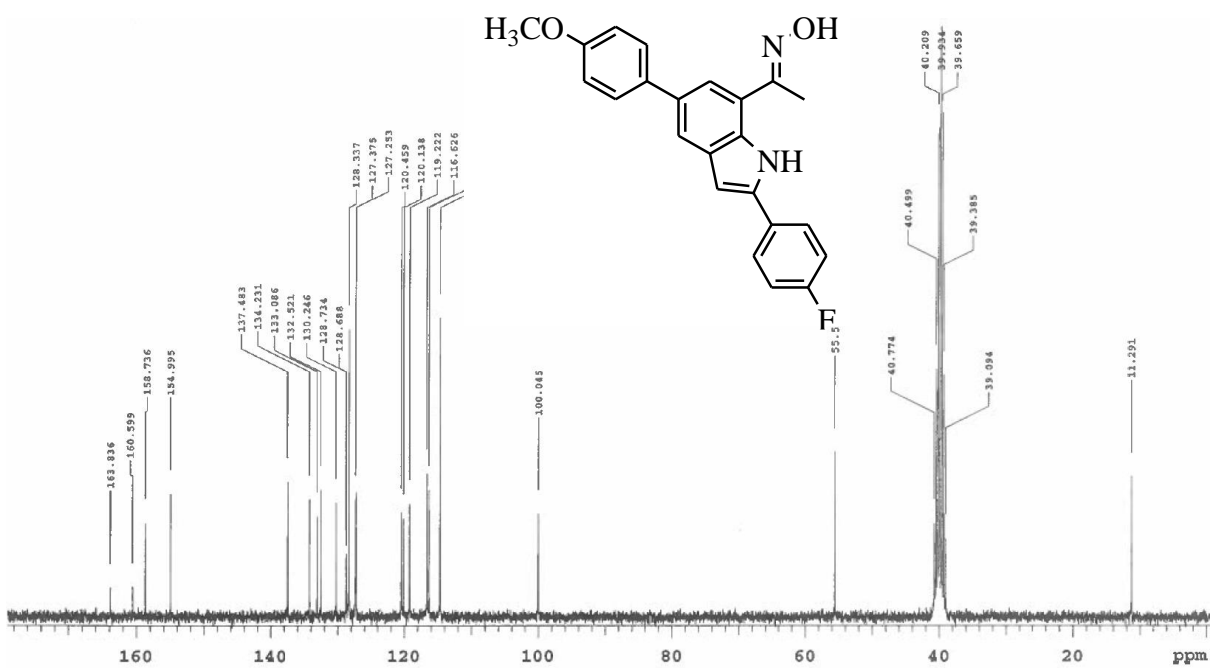

38

39 Figure S6. <sup>13</sup>C NMR Spectrum of Compound 2c in DMSO-*d*<sub>6</sub> at 75 MHz

40

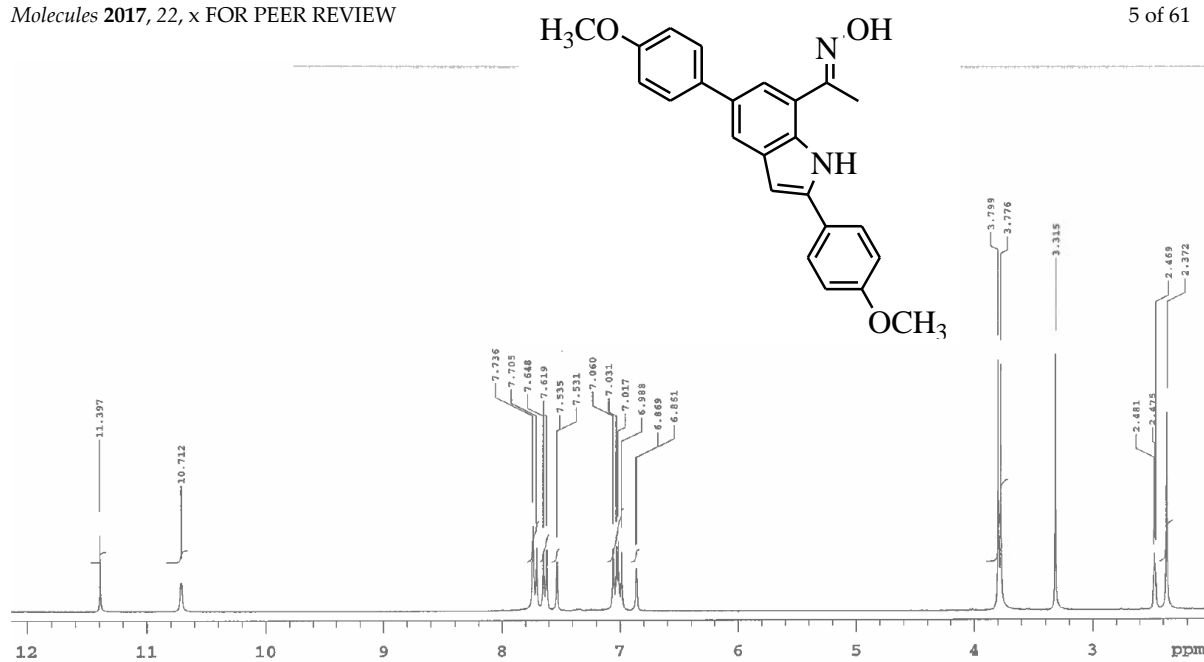

41  
42  
43  
44  
45

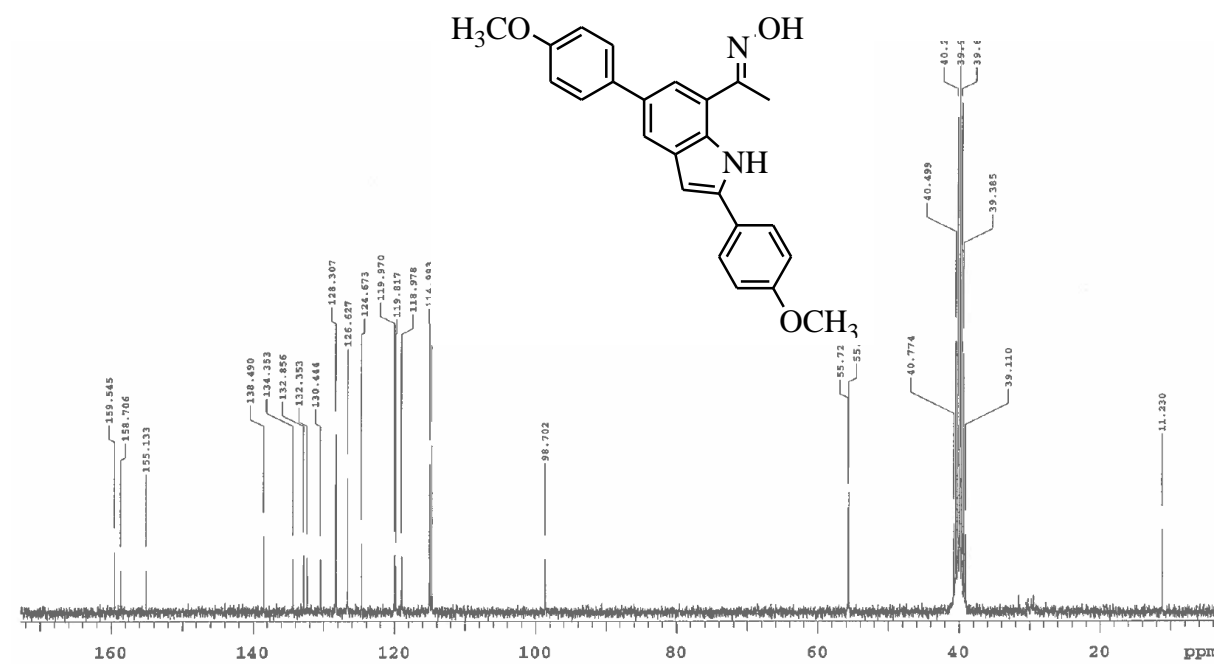

46  
47  
48

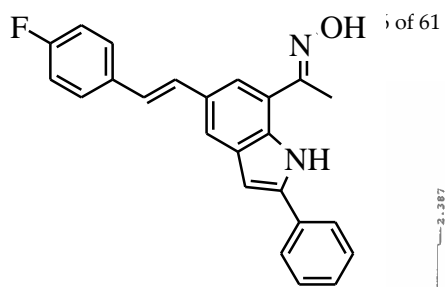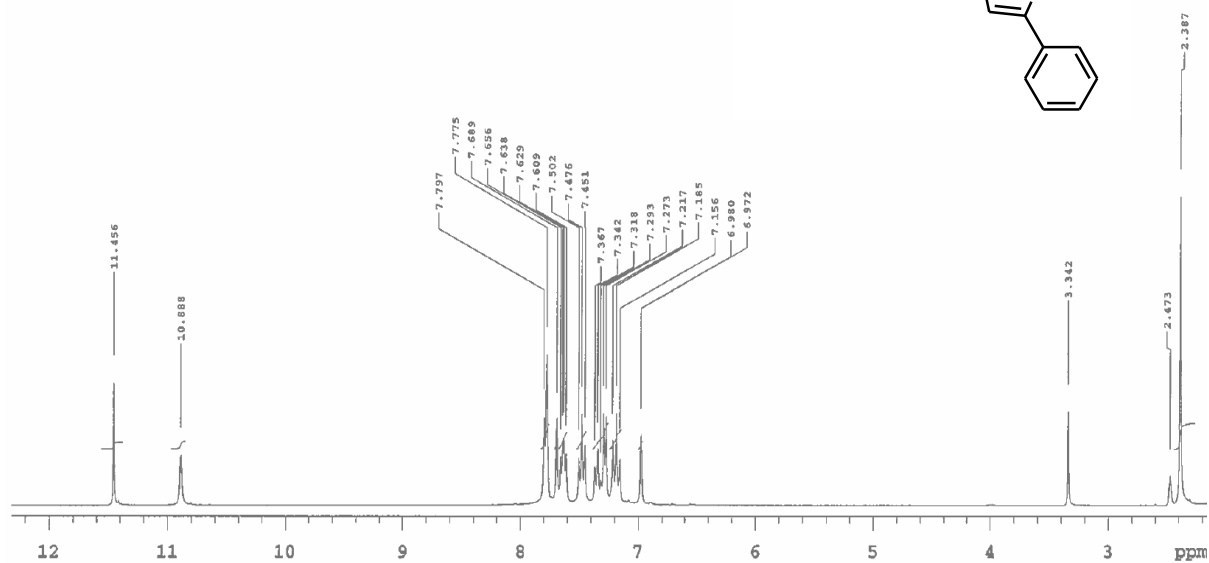

49

50 Figure S9. <sup>1</sup>H NMR Spectrum of Compound 2e in DMSO-*d*<sub>6</sub> at 300 MHz

51

52

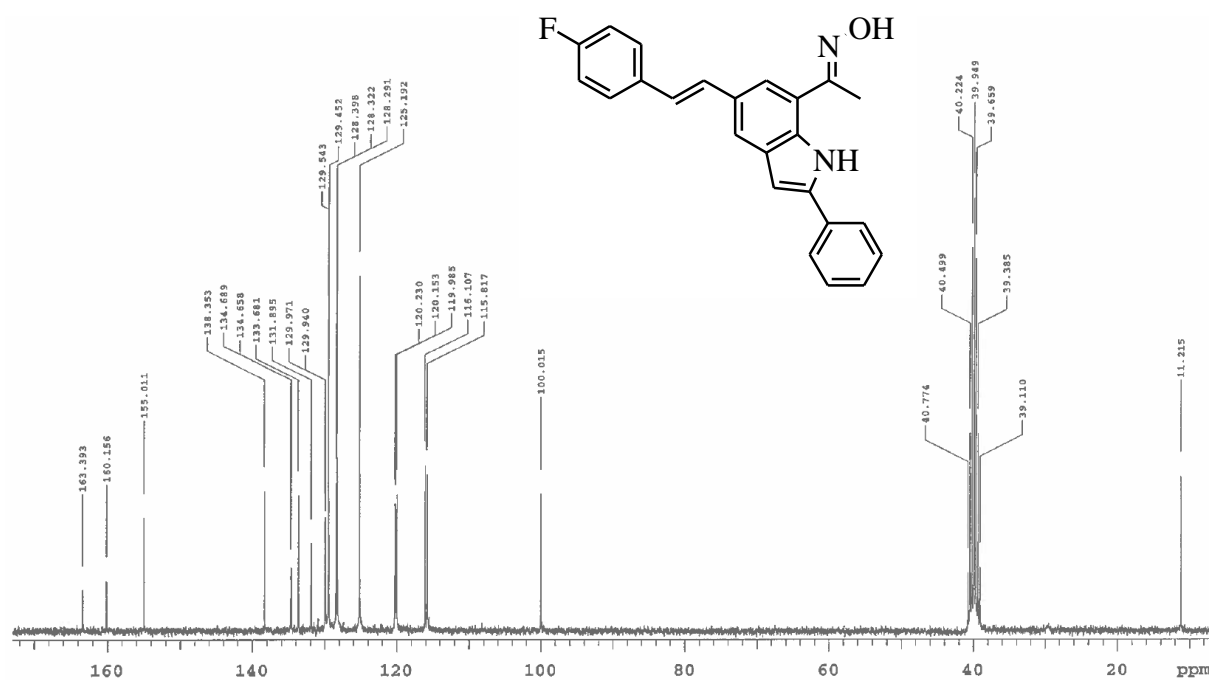

53

54 Figure S10. <sup>13</sup>C NMR Spectrum of Compound 2e in DMSO-*d*<sub>6</sub> at 75 MHz

55

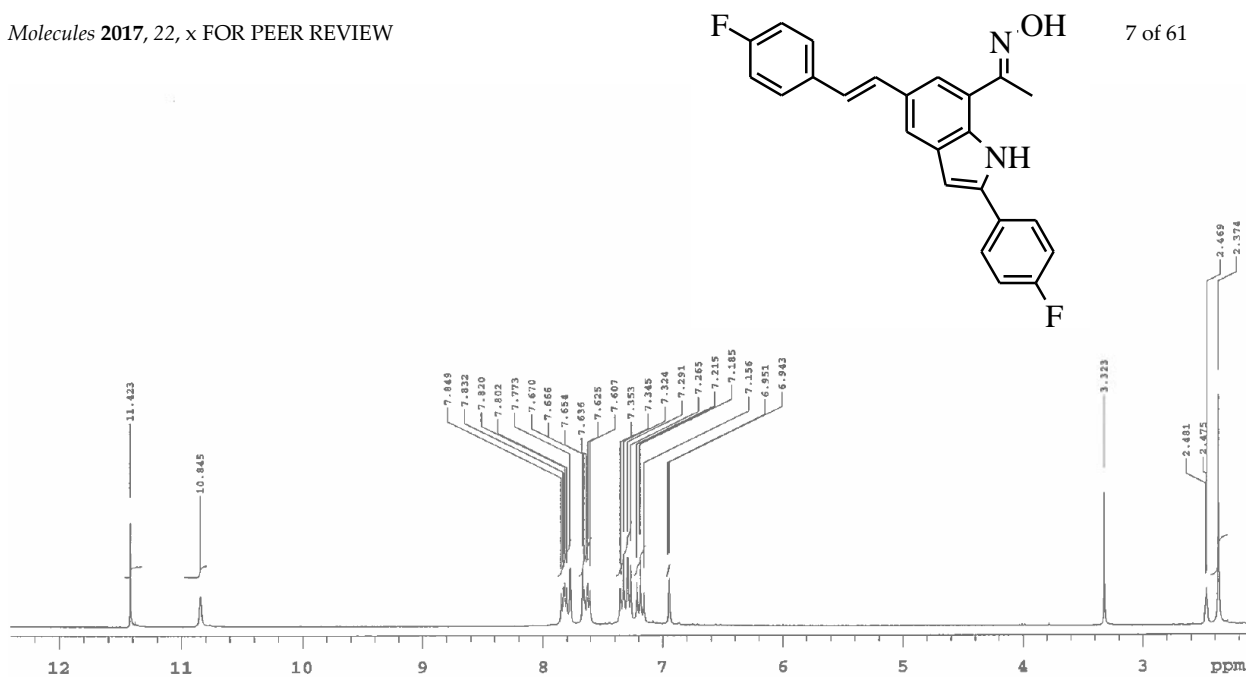

56

57 Figure S11. <sup>1</sup>H NMR Spectrum of Compound 2f in DMSO-d<sub>6</sub> at 300 MHz

58

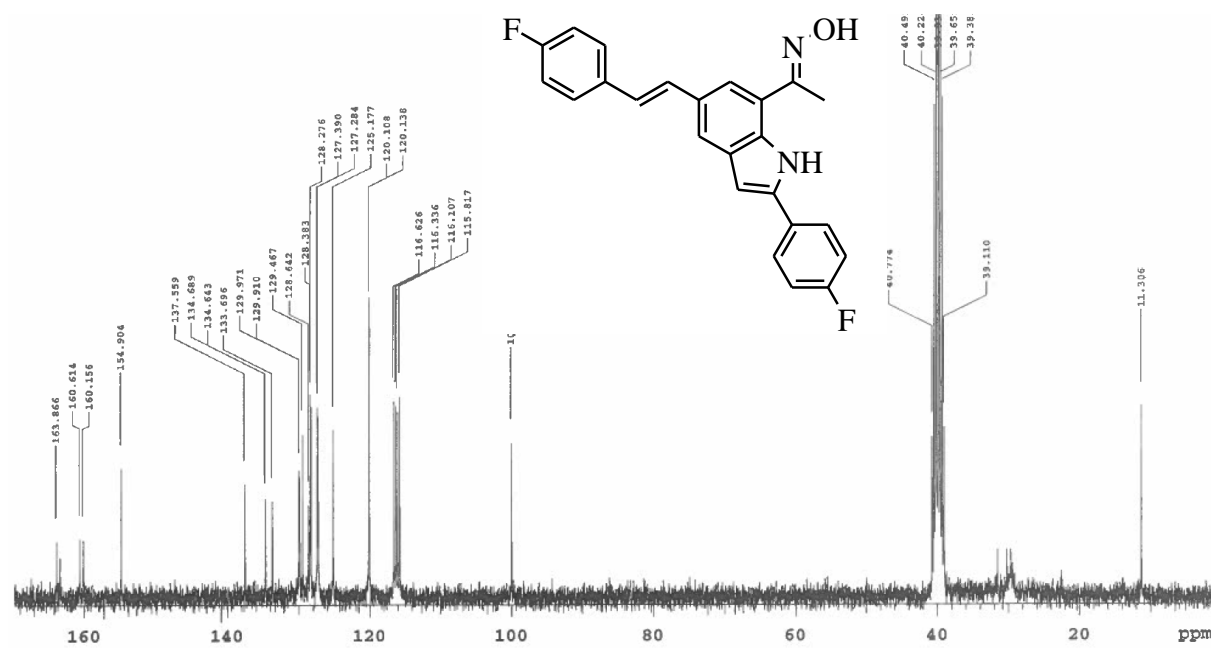

59

60 Figure S12. <sup>13</sup>C NMR Spectrum of Compound 2f in DMSO-d<sub>6</sub> at 75 MHz

61

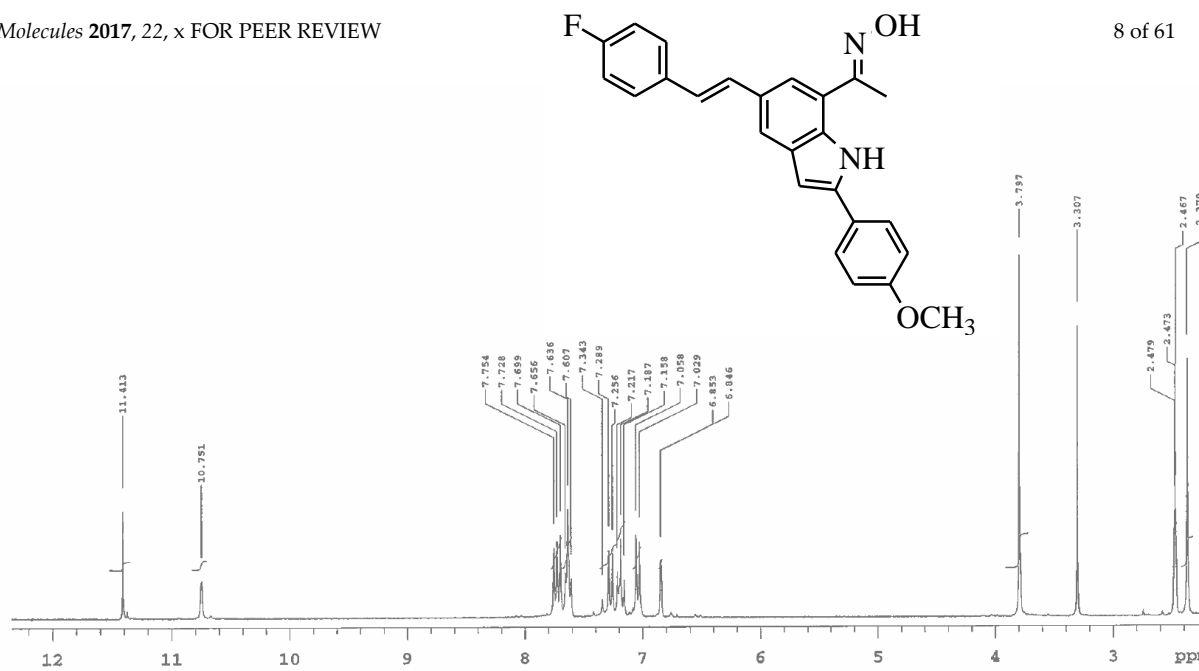

62

63 Figure S13. <sup>1</sup>H NMR Spectrum of Compound 2g in DMSO-*d*<sub>6</sub> at 300 MHz

64

65

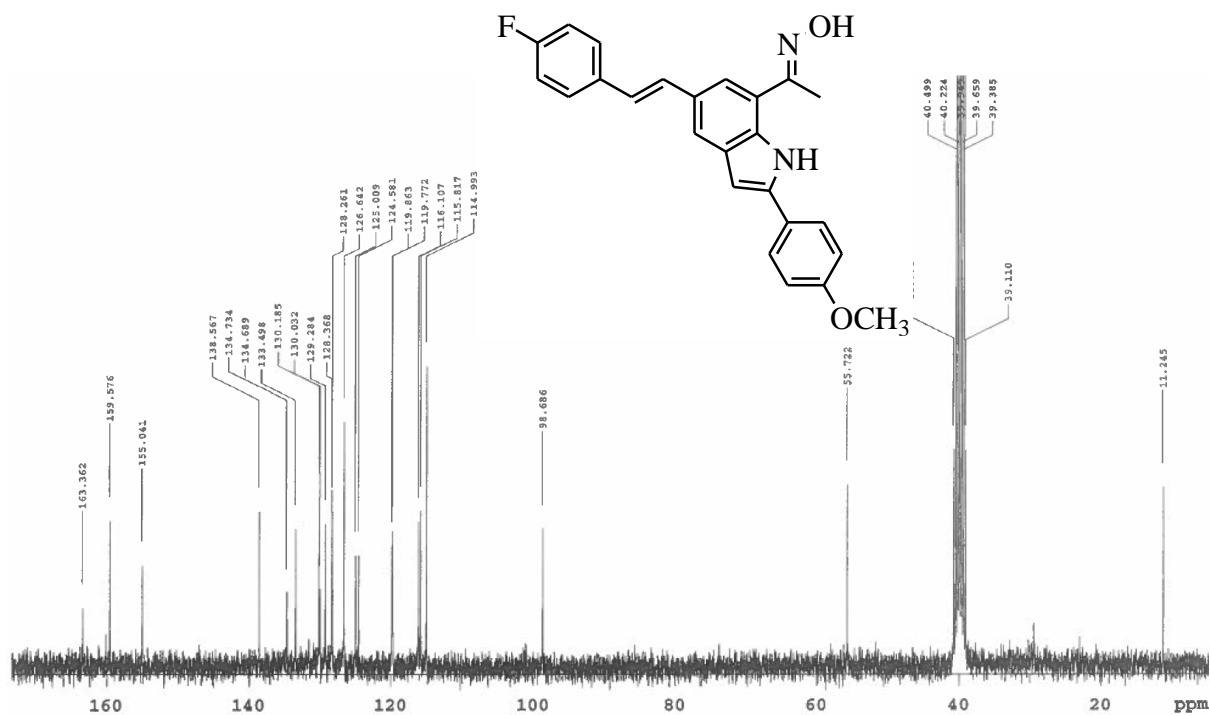

66

67 Figure S14. <sup>13</sup>C NMR Spectrum of Compound 2g in DMSO-*d*<sub>6</sub> at 75 MHz

68



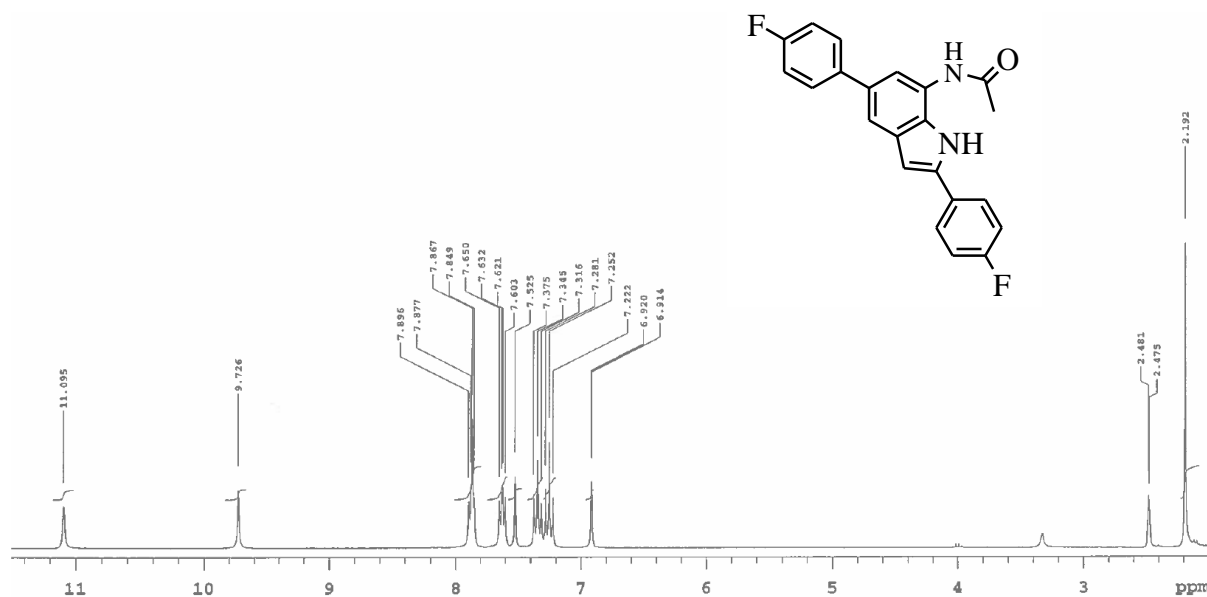

69

70 Figure S15. <sup>1</sup>H NMR Spectrum of Compound 3a in DMSO-*d*<sub>6</sub> at 300 MHz

71

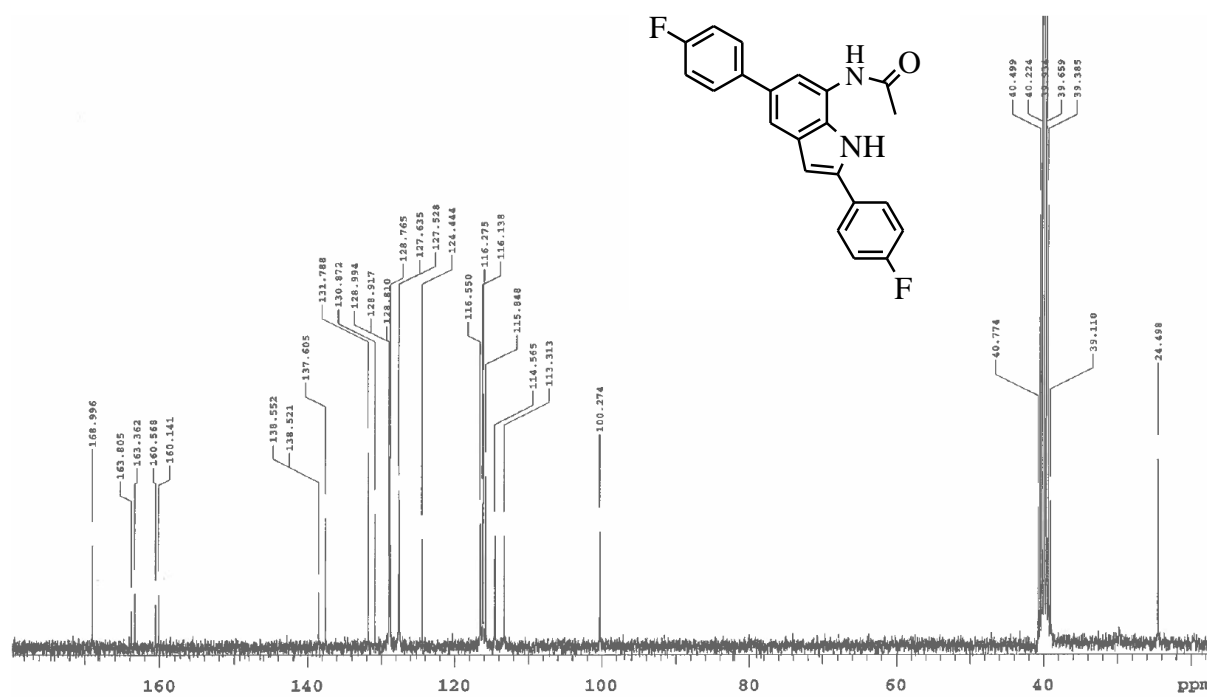

72

73 Figure S16. <sup>13</sup>C NMR Spectrum of Compound 3a in DMSO-*d*<sub>6</sub> at 75 MHz

74

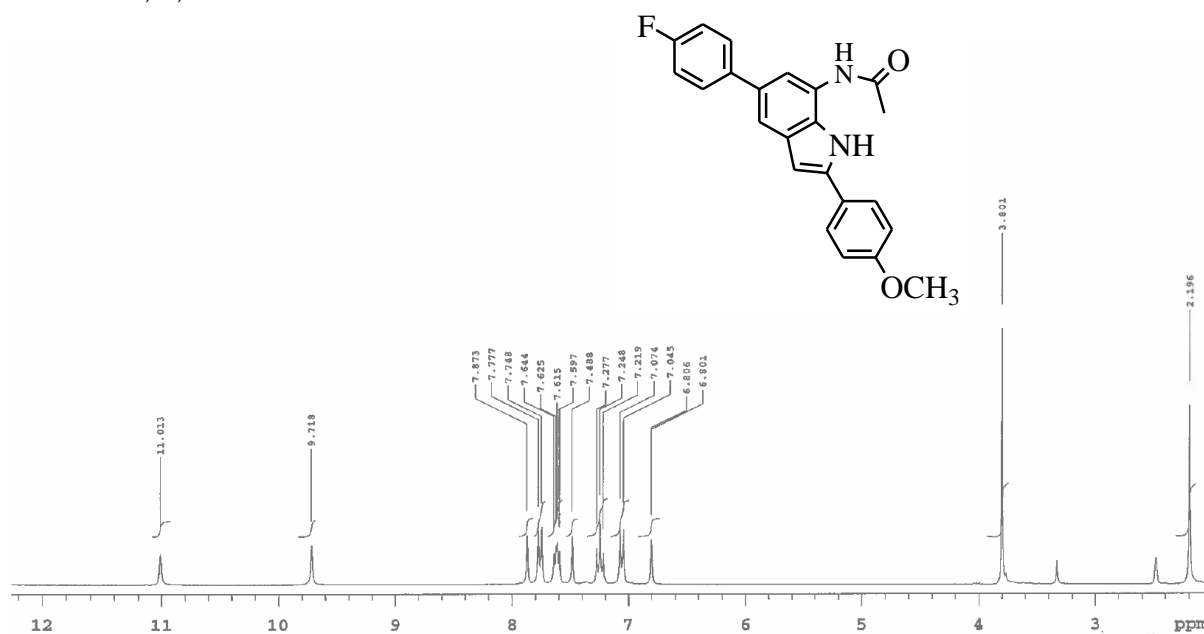

75

76

77

Figure S17. <sup>1</sup>H NMR Spectrum of Compound 3b in DMSO-*d*<sub>6</sub> at 300 MHz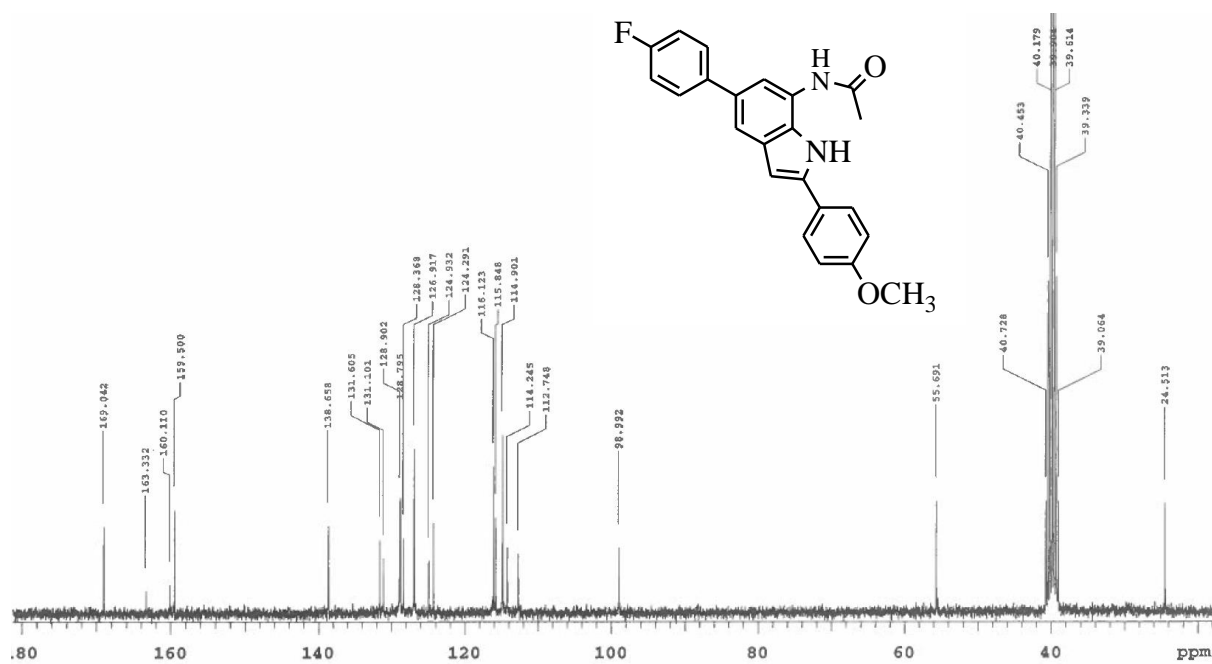

78

79

80

Figure S18. <sup>13</sup>C NMR Spectrum of Compound 3b in DMSO-*d*<sub>6</sub> at 75 MHz

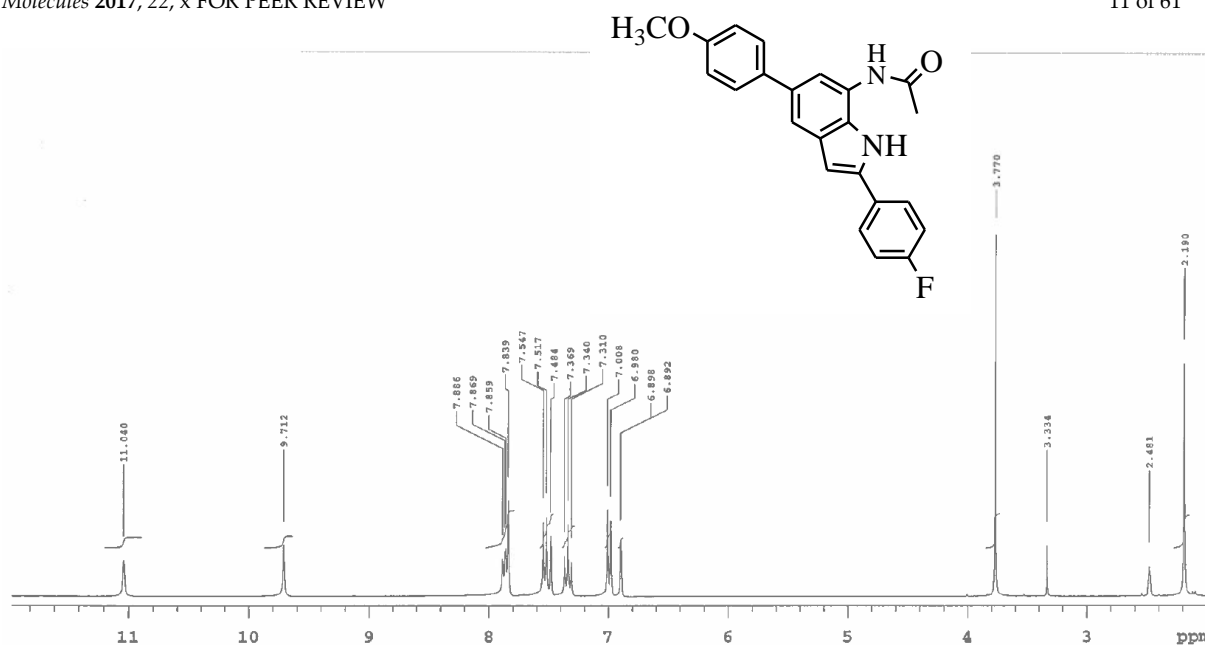

81  
82  
83

Figure S19. <sup>1</sup>H NMR Spectrum of Compound 3c in DMSO-*d*<sub>6</sub> at 300 MHz

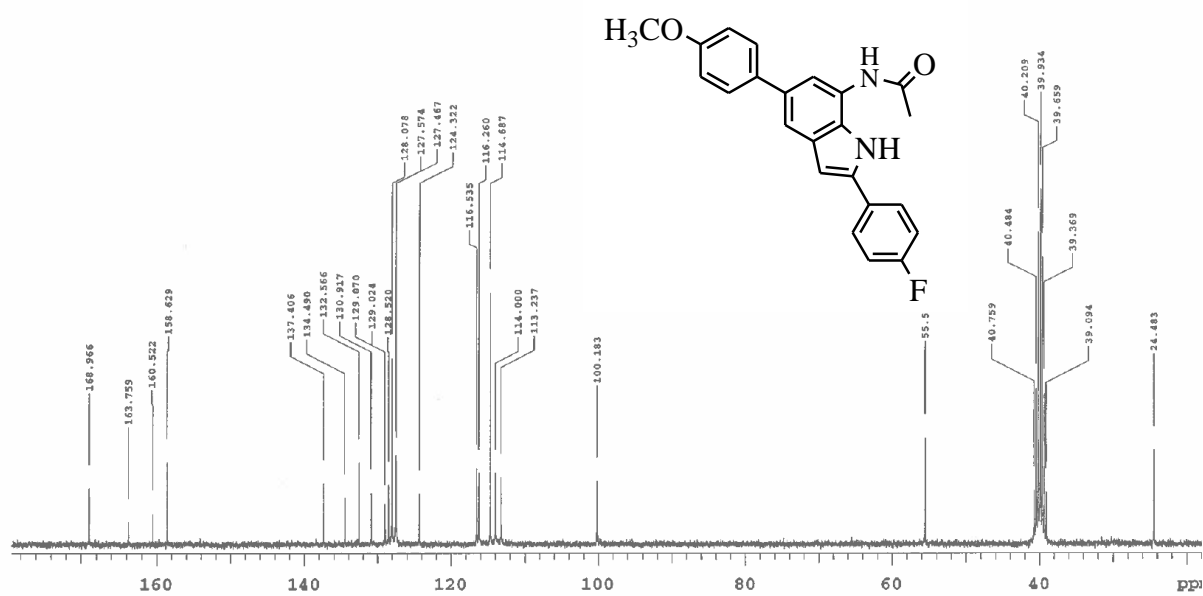

84  
85  
86

Figure S20. <sup>13</sup>C NMR Spectrum of Compound 3c in DMSO-*d*<sub>6</sub> at 75 MHz

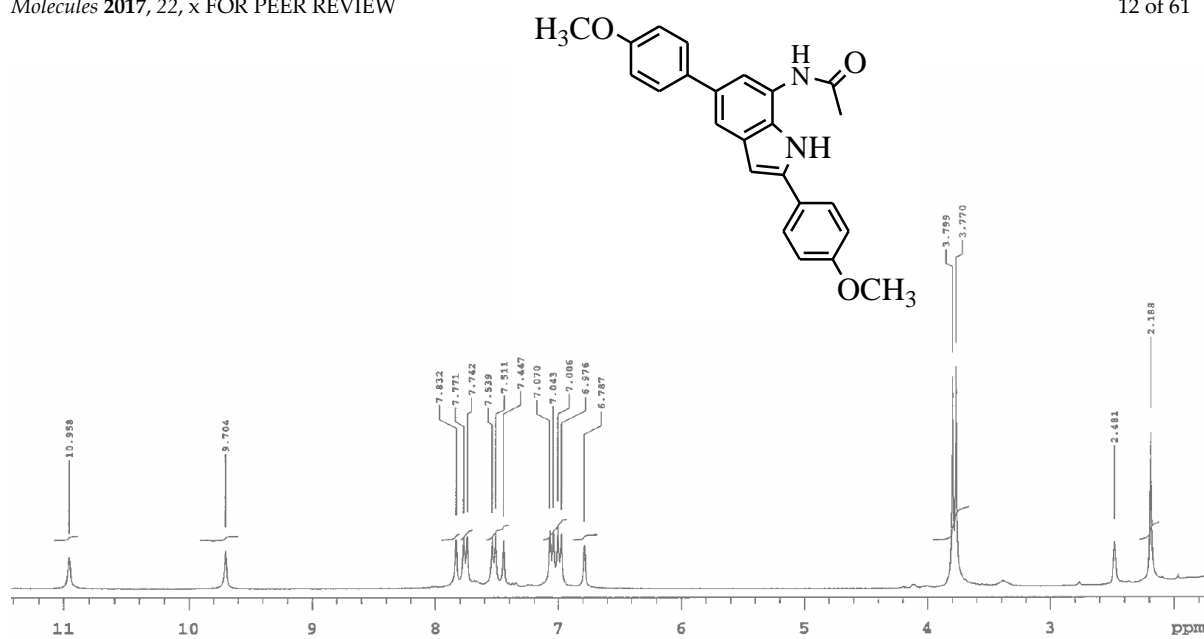

87

88 Figure S21. <sup>1</sup>H NMR Spectrum of Compound 3d in DMSO-*d*<sub>6</sub> at 300 MHz

89

90

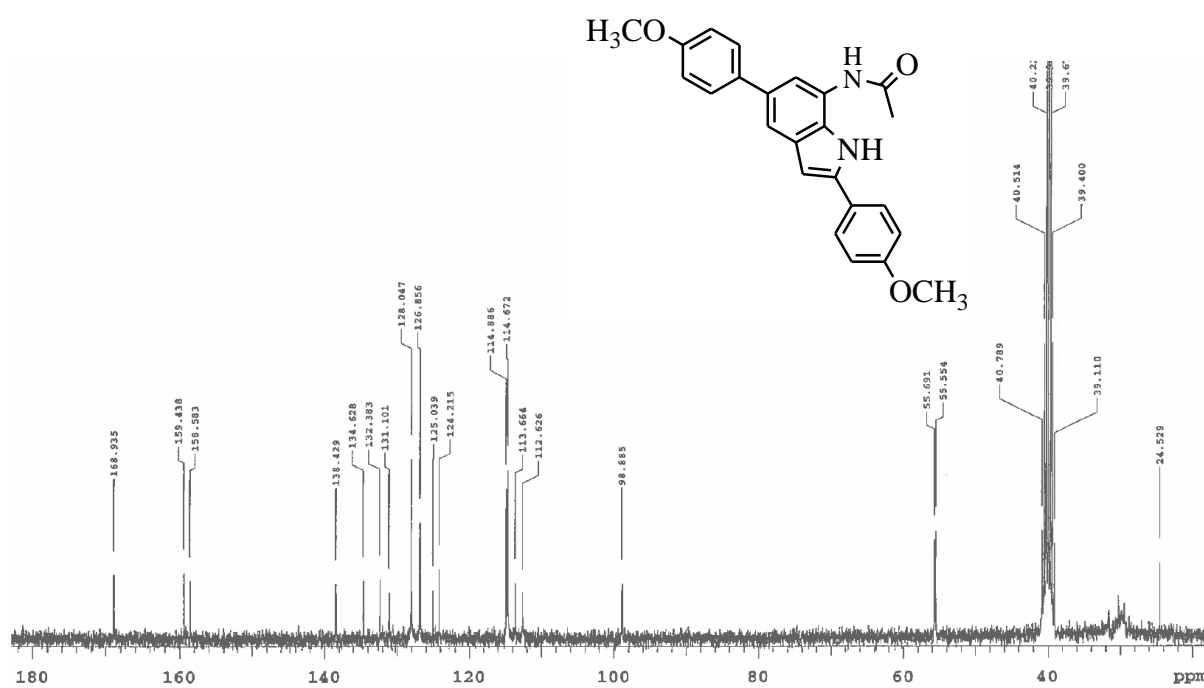

91

92 Figure S22. <sup>13</sup>C NMR Spectrum of Compound 3d in DMSO-*d*<sub>6</sub> at 75 MHz

93

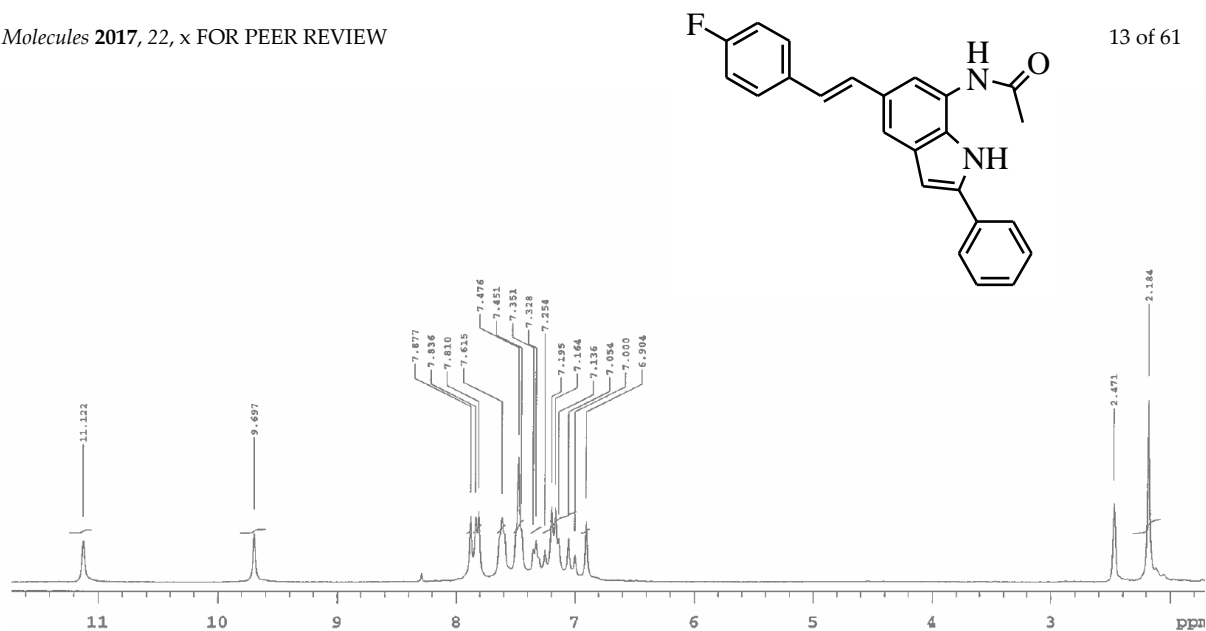

94

95 Figure S23. <sup>1</sup>H NMR Spectrum of Compound 3e in DMSO-*d*<sub>6</sub> at 300 MHz

96

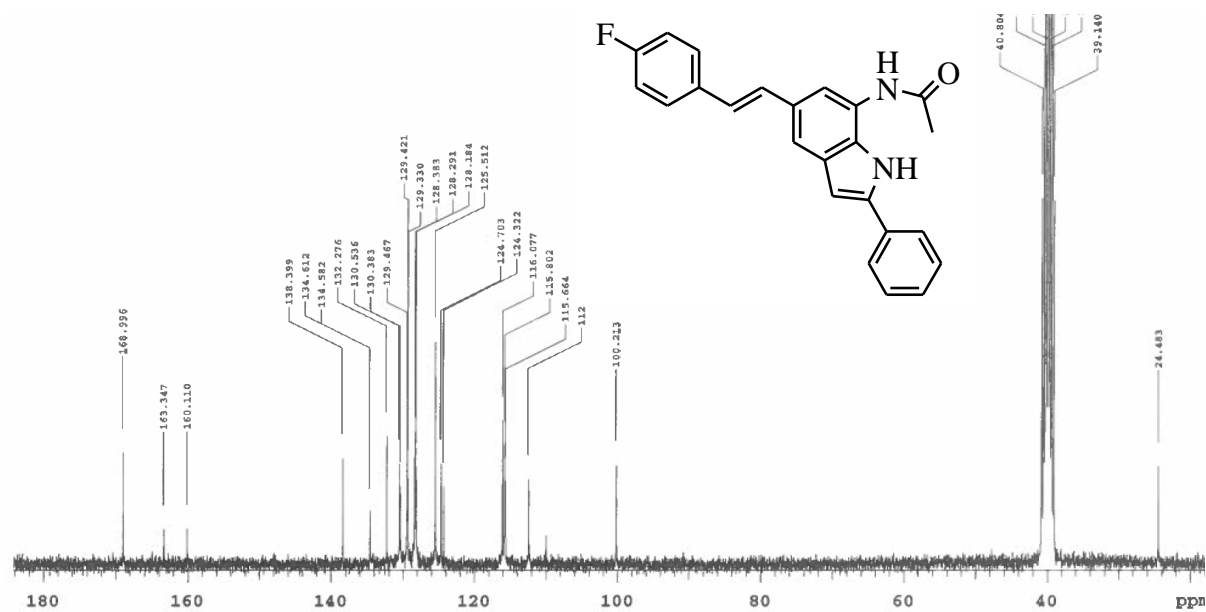

97

98 Figure S24. <sup>13</sup>C NMR Spectrum of Compound 3e in DMSO-*d*<sub>6</sub> at 75 MHz

99

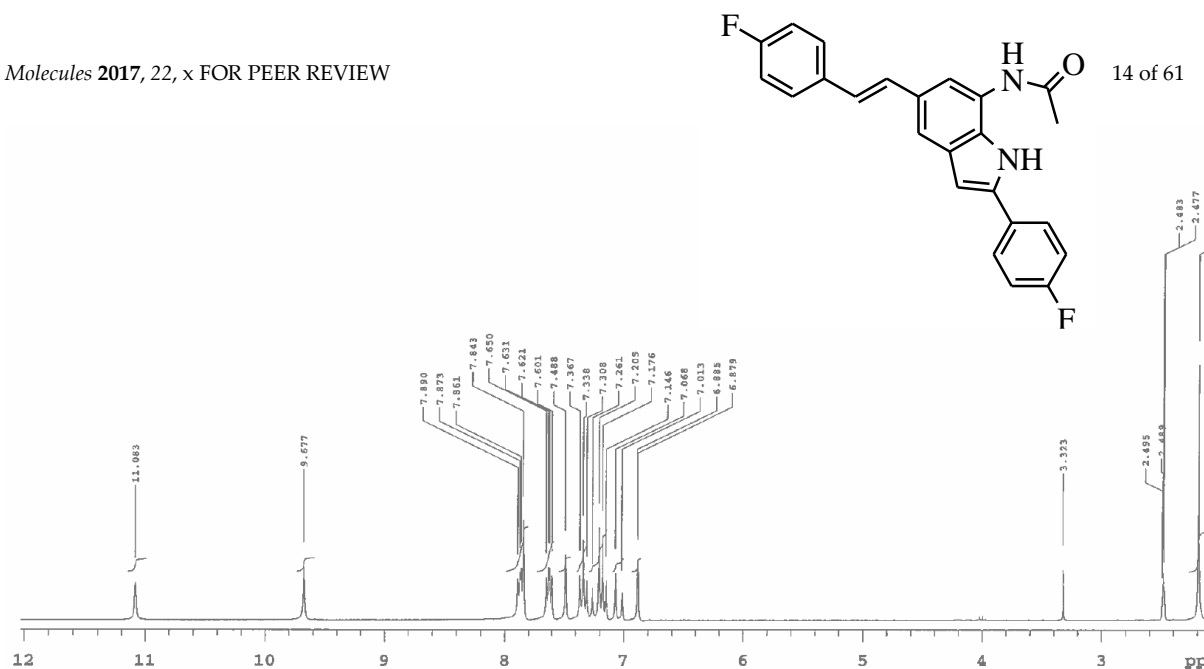

100

101

102

Figure S25. <sup>1</sup>H NMR Spectrum of Compound 3f in DMSO-*d*<sub>6</sub> at 300 MHz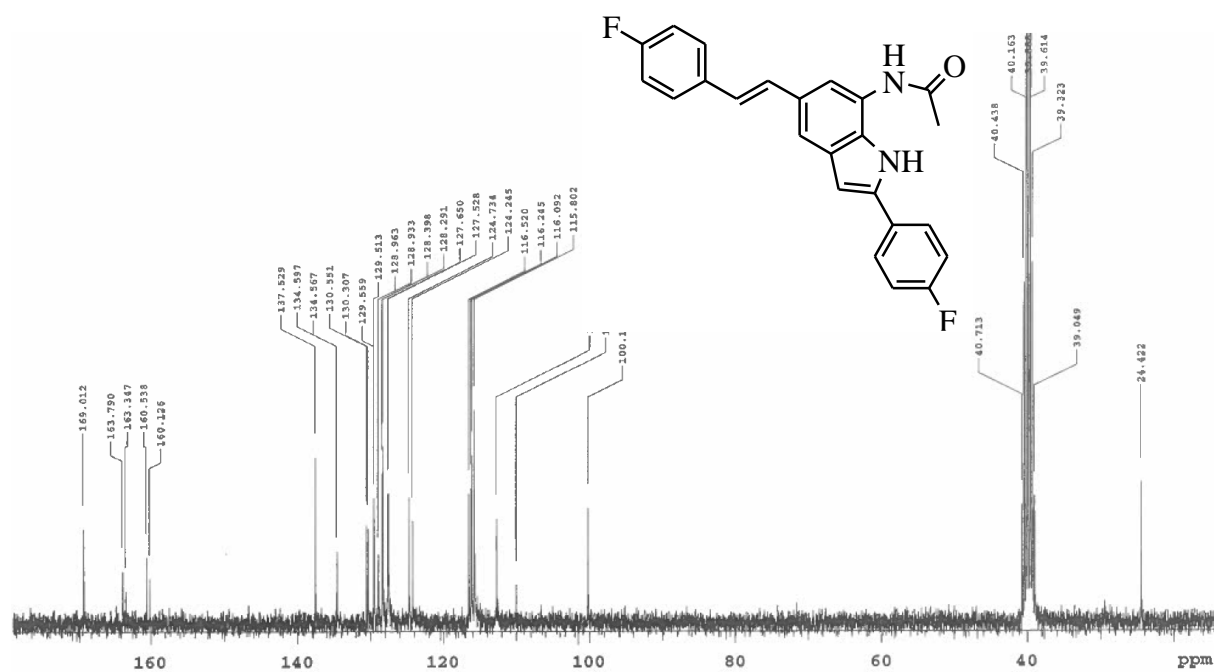

103

104

105

106

107

108

109

Figure S26. <sup>13</sup>C NMR Spectrum of Compound 3f in DMSO-*d*<sub>6</sub> at 75 MHz

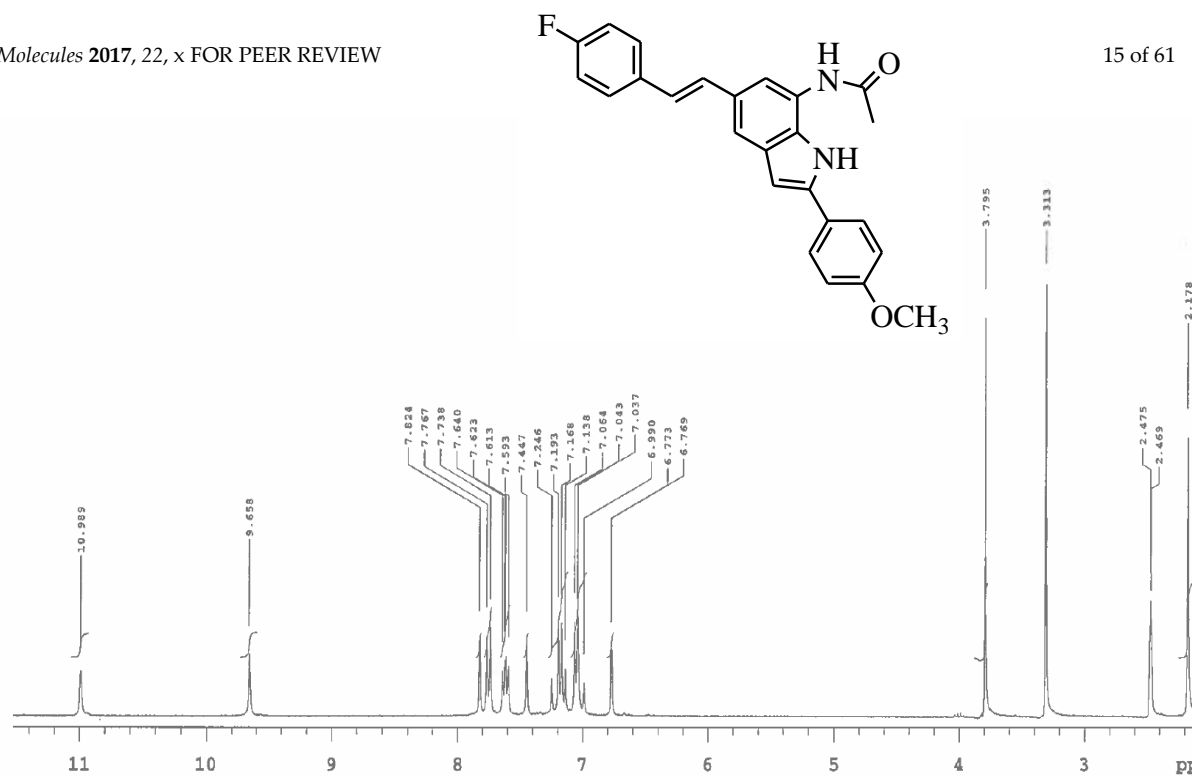

110

111 Figure S27. <sup>1</sup>H NMR Spectrum of Compound 3g in DMSO-*d*<sub>6</sub> at 300 MHz

112

113

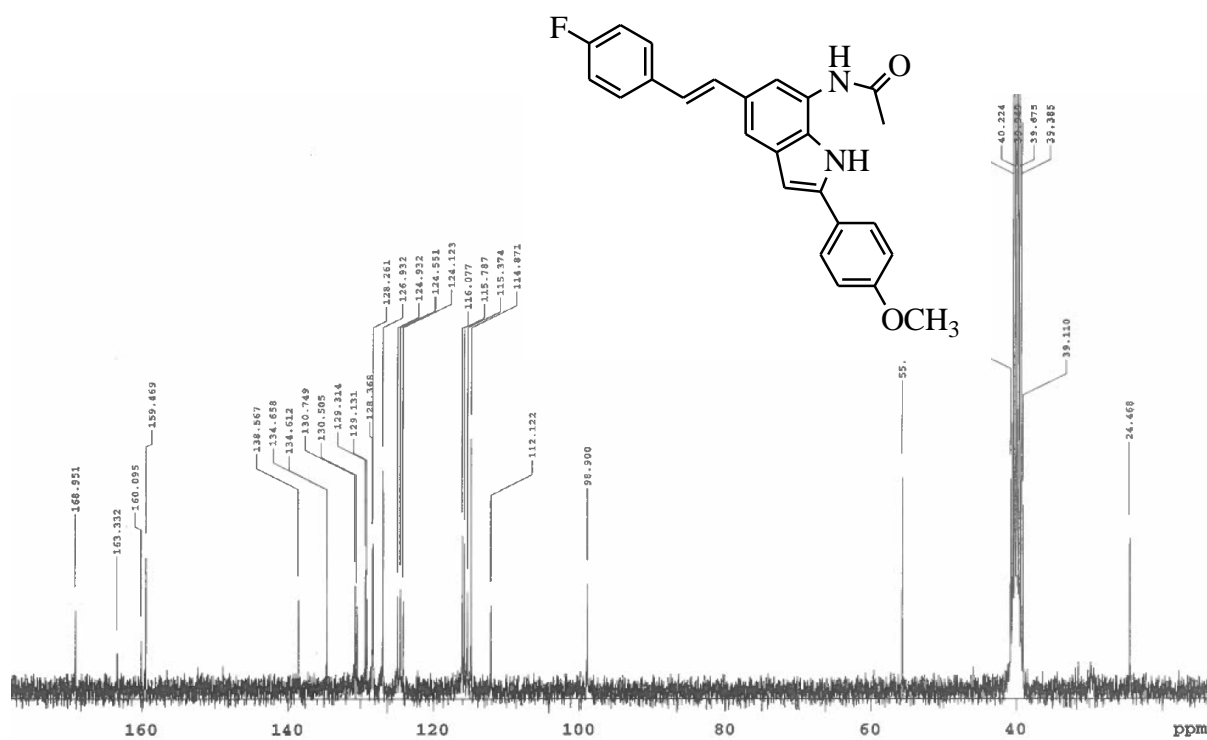

114

115 Figure S28. <sup>13</sup>C NMR Spectrum of Compound 3g in DMSO-*d*<sub>6</sub> at 75 MHz

116

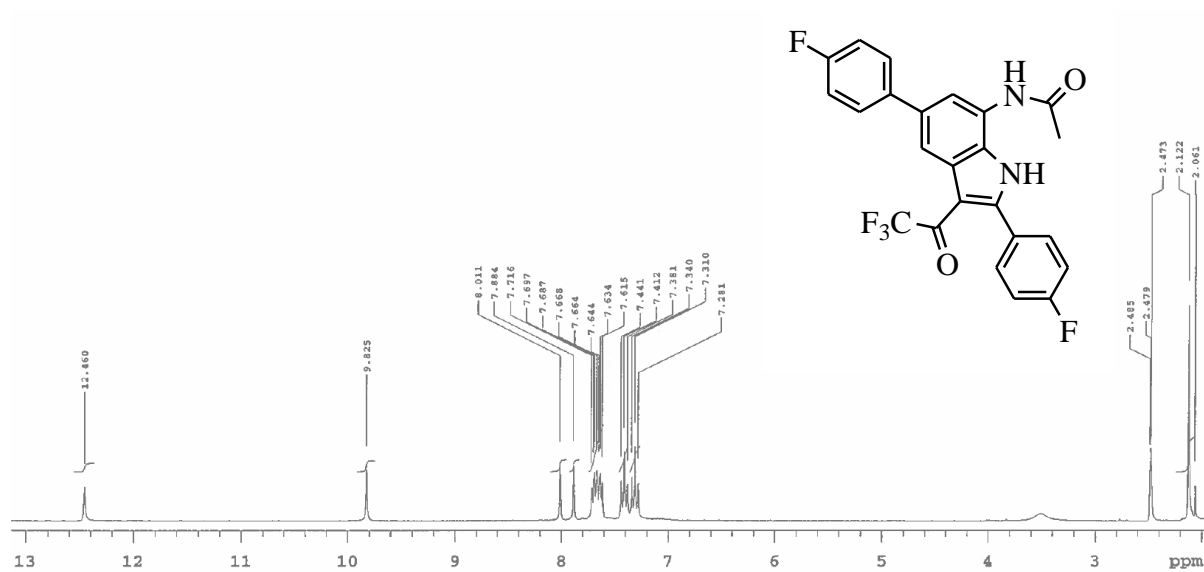

117

118 Figure S29. <sup>1</sup>H NMR Spectrum of Compound 4a in DMSO-*d*<sub>6</sub> at 300 MHz

119

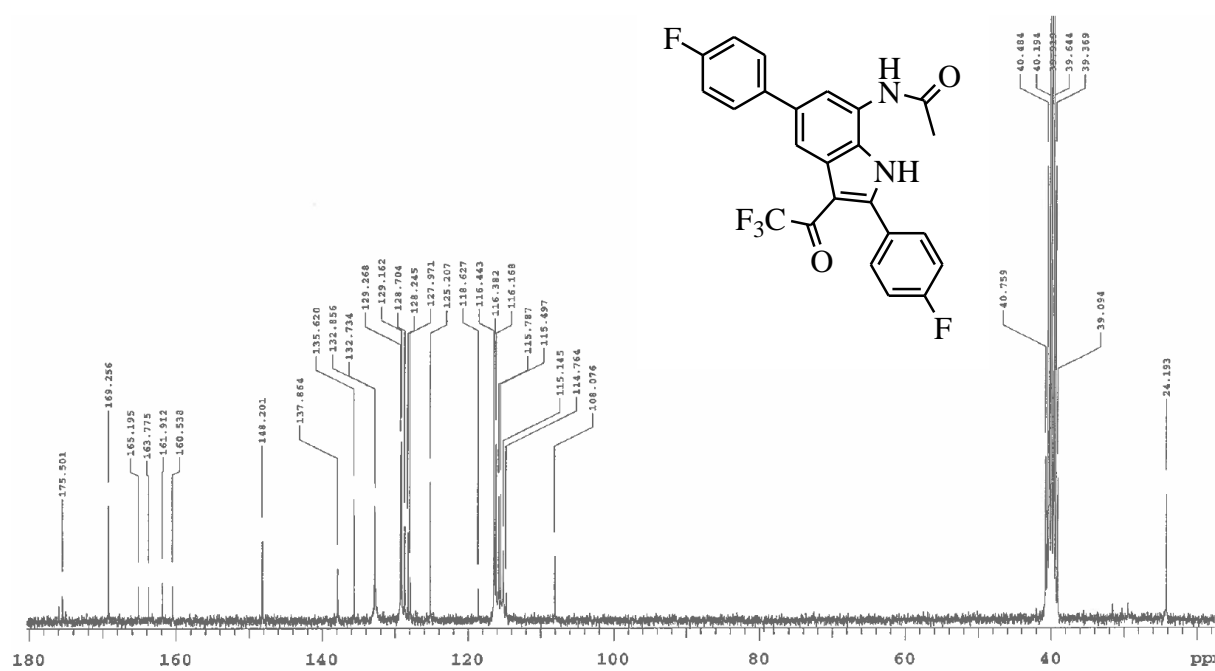

120

121 Figure S30. <sup>13</sup>C NMR Spectrum of Compound 4a in DMSO-*d*<sub>6</sub> at 75 MHz

122



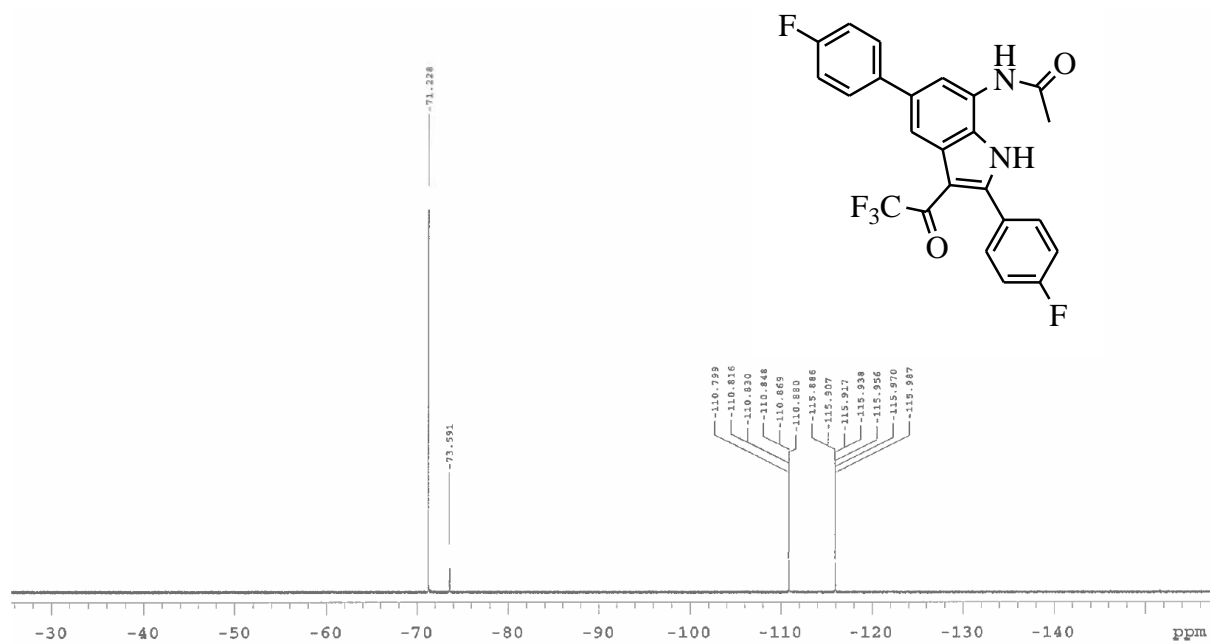

123

124 Figure S31. <sup>19</sup>F NMR Spectrum of Compound 4a in DMSO-*d*<sub>6</sub> at 282 MHz

125

126

127

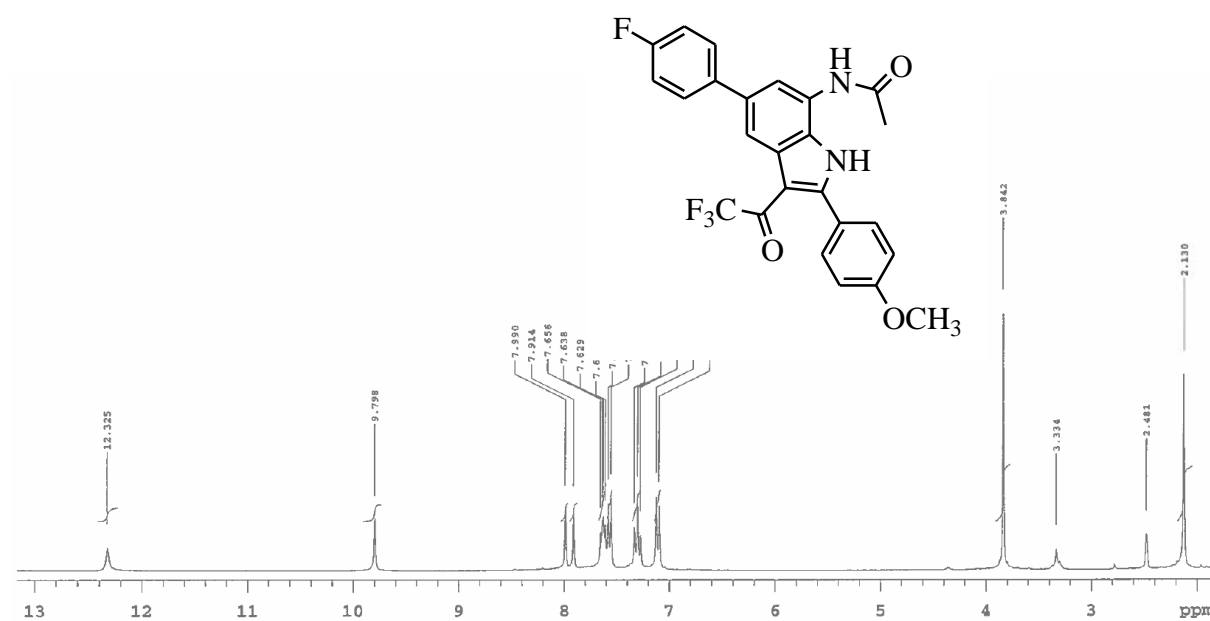

128

129 Figure S32. <sup>1</sup>H NMR Spectrum of Compound 4b in DMSO-*d*<sub>6</sub> at 300 MHz

130

131

132

133

134

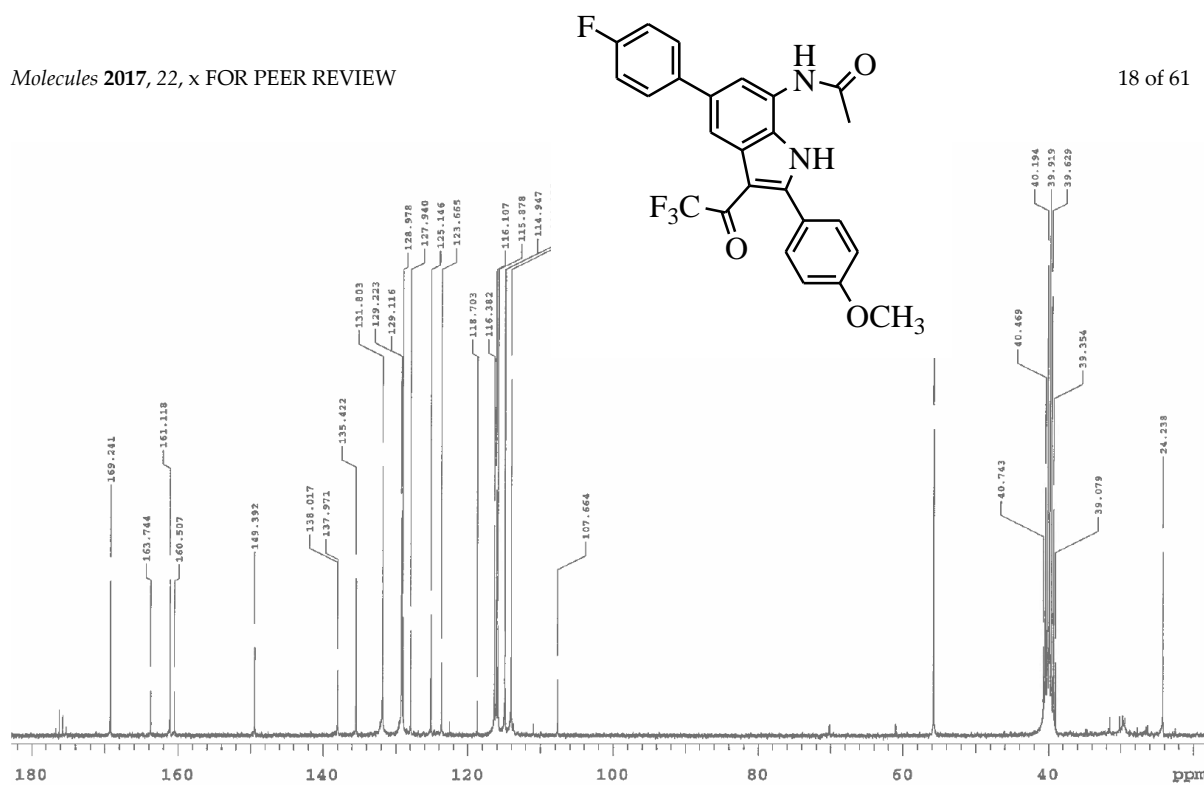

135

136 Figure S33. <sup>13</sup>C NMR Spectrum of Compound 4b in DMSO-*d*<sub>6</sub> at 75 MHz

137

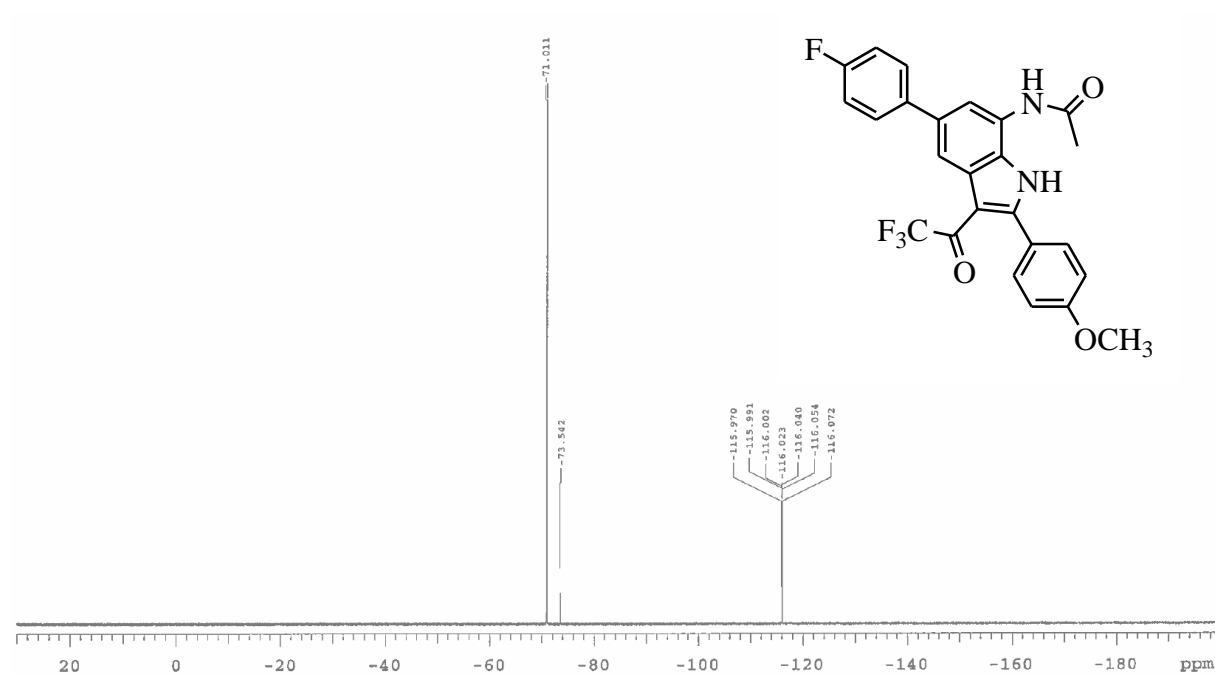

138

139 Figure S34. <sup>19</sup>F NMR Spectrum of Compound 4b in DMSO-*d*<sub>6</sub> at 282 MHz

140

141

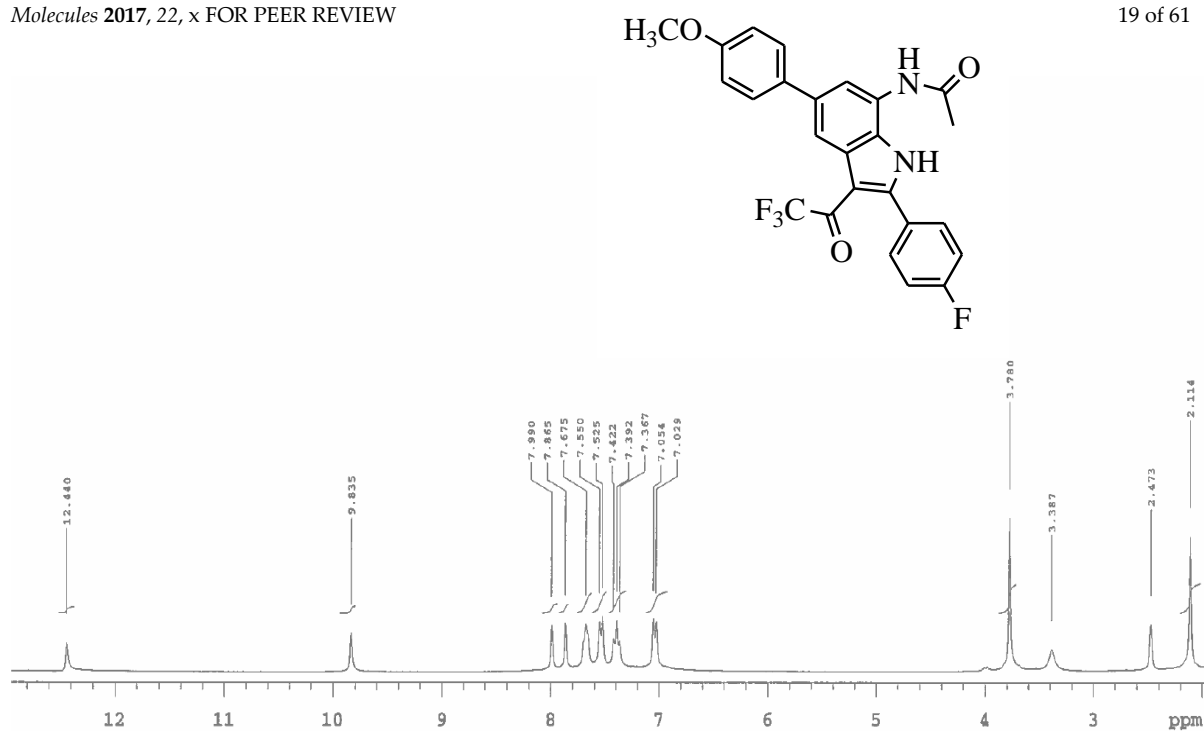

142

143 Figure S35. <sup>1</sup>H NMR Spectrum of Compound 4c in DMSO-*d*<sub>6</sub> at 300 MHz

144

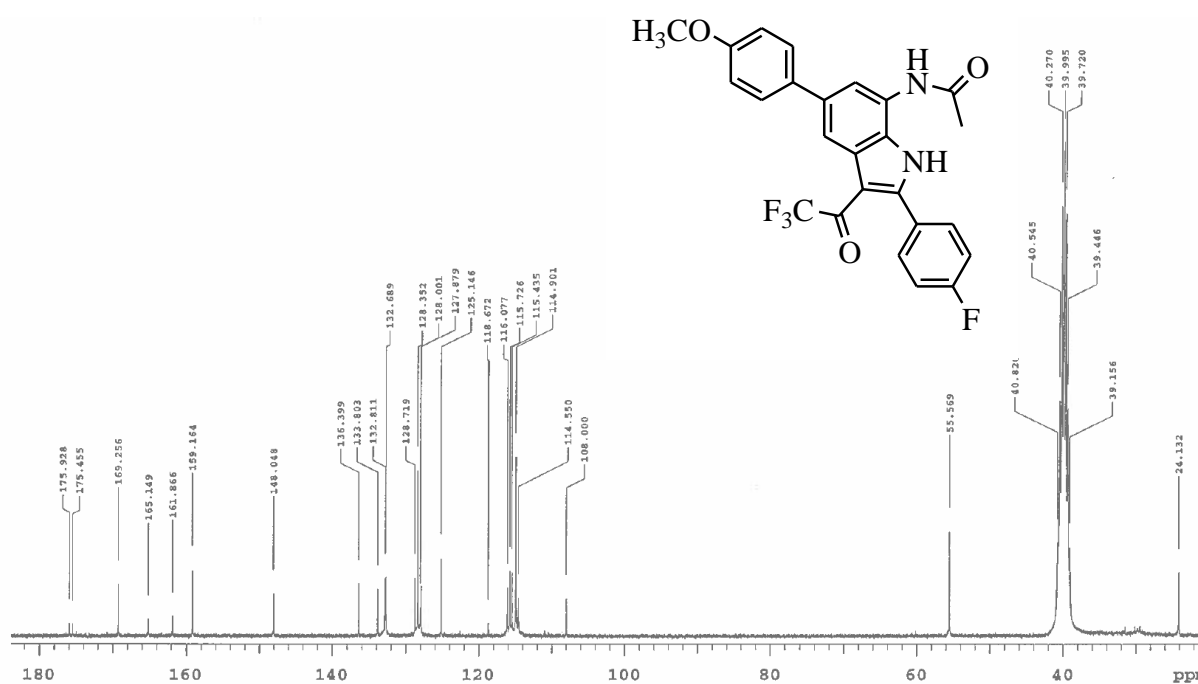

145

146 Figure S36. <sup>13</sup>C NMR Spectrum of Compound 4c in DMSO-*d*<sub>6</sub> at 75 MHz

147

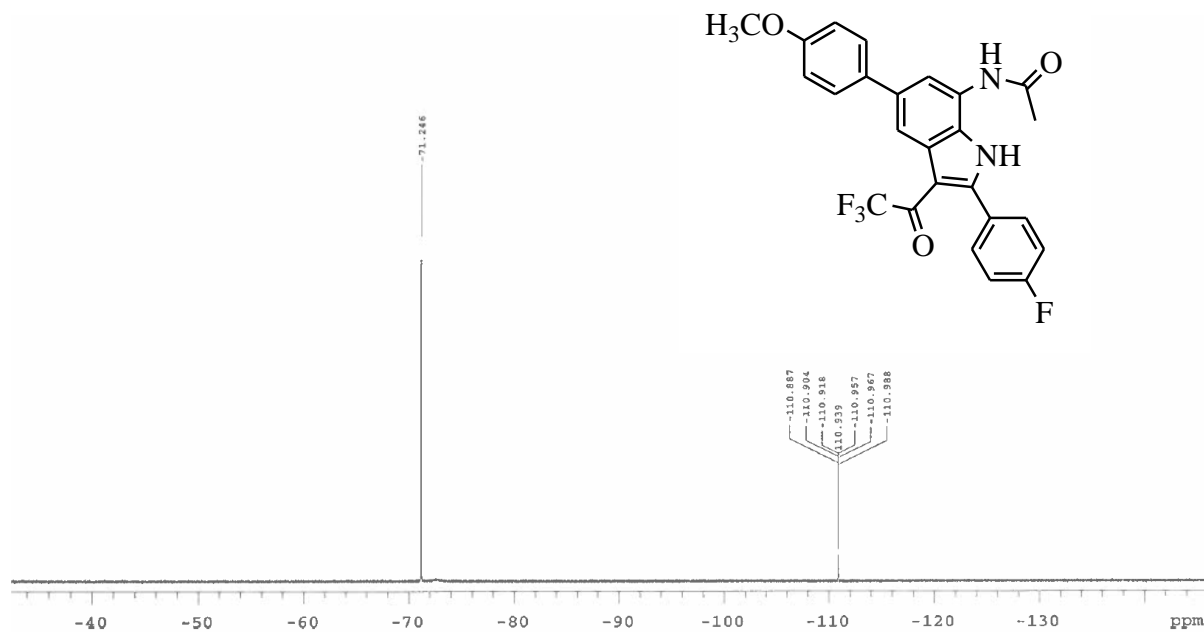

148

149 Figure S37. <sup>19</sup>F NMR Spectrum of Compound 4c in DMSO-*d*<sub>6</sub> at 282 MHz

150

151

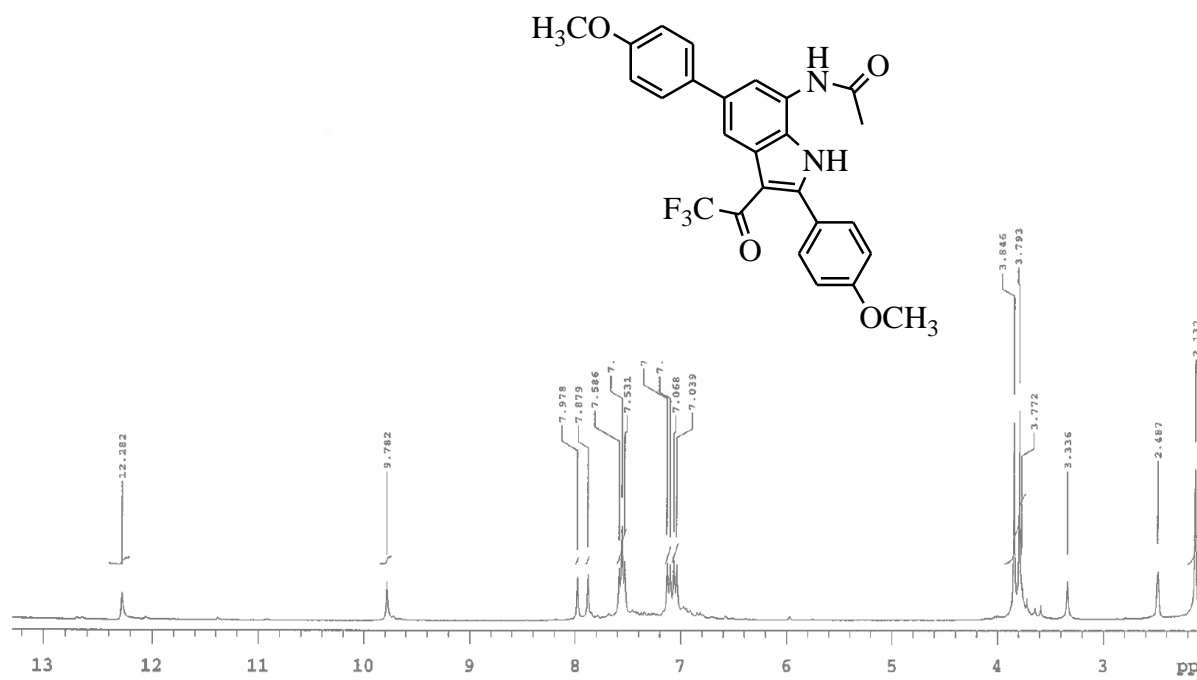

152

153 Figure S38. <sup>1</sup>H NMR Spectrum of Compound 4d in DMSO-*d*<sub>6</sub> at 300 MHz

154

155

156

157

158

159

160

161

162

163  
164  
165

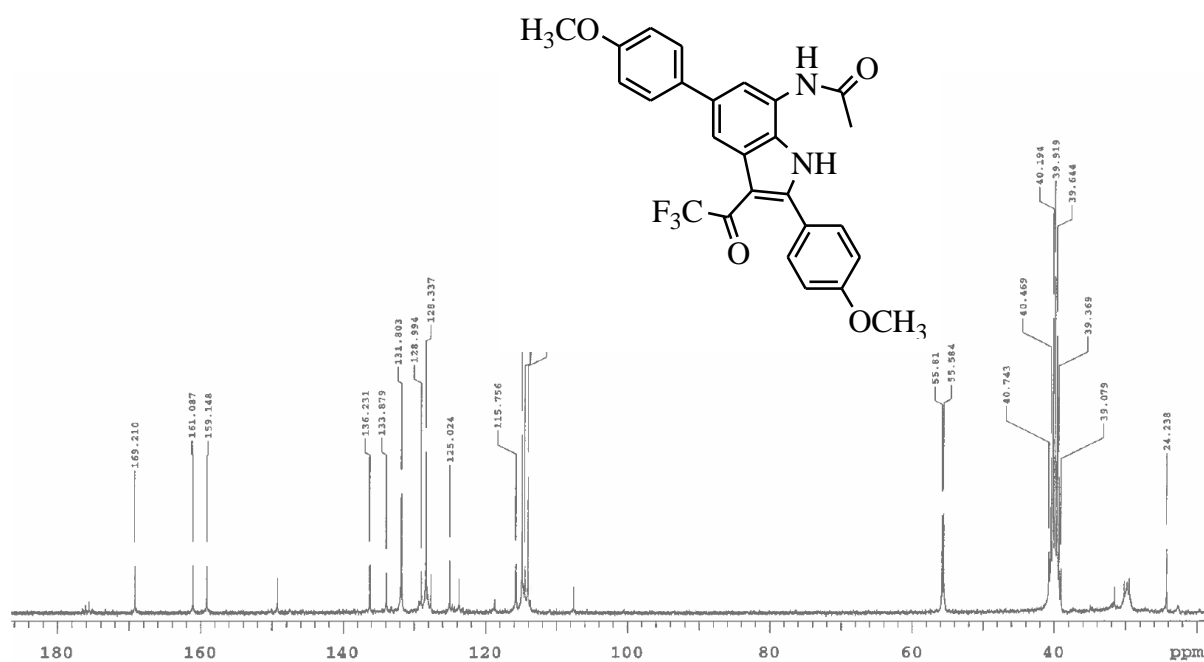

167

Figure S39.  $^{13}\text{C}$  NMR Spectrum of Compound 4d in  $\text{DMSO-}d_6$  at 75 MHz

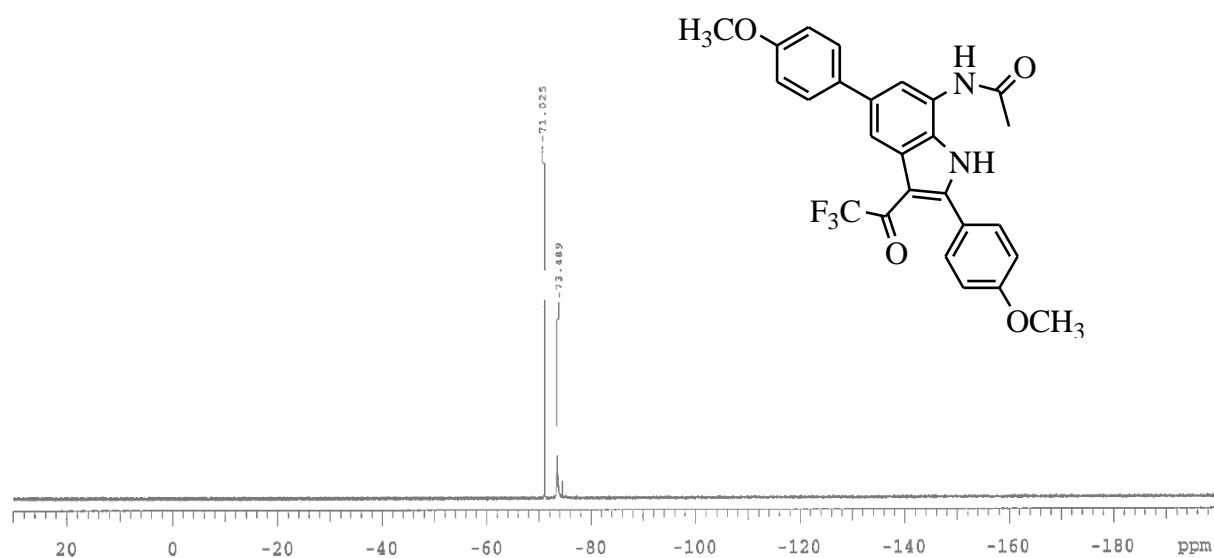

169

Figure S40.  $^{19}\text{F}$  NMR Spectrum of Compound 4d in  $\text{DMSO-}d_6$  at 282 MHz

170

171

172

173

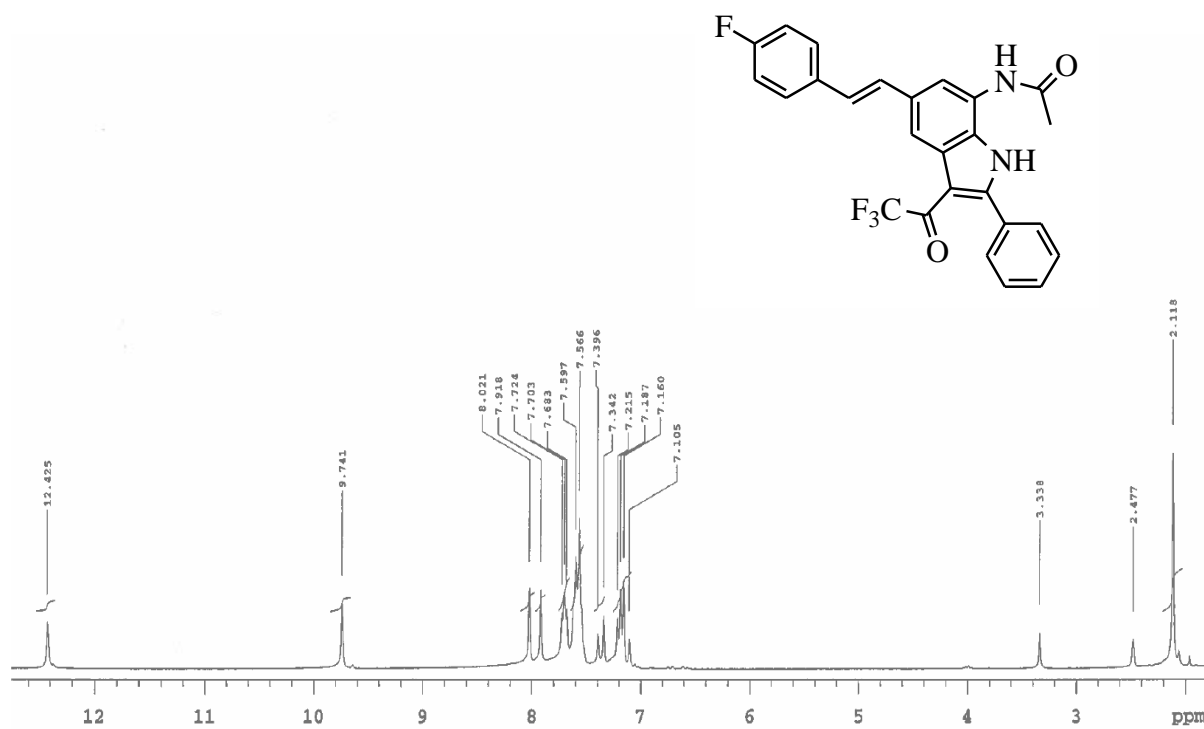

174

175 Figure S41. <sup>1</sup>H NMR Spectrum of Compound 4e in DMSO-*d*<sub>6</sub> at 300 MHz

176

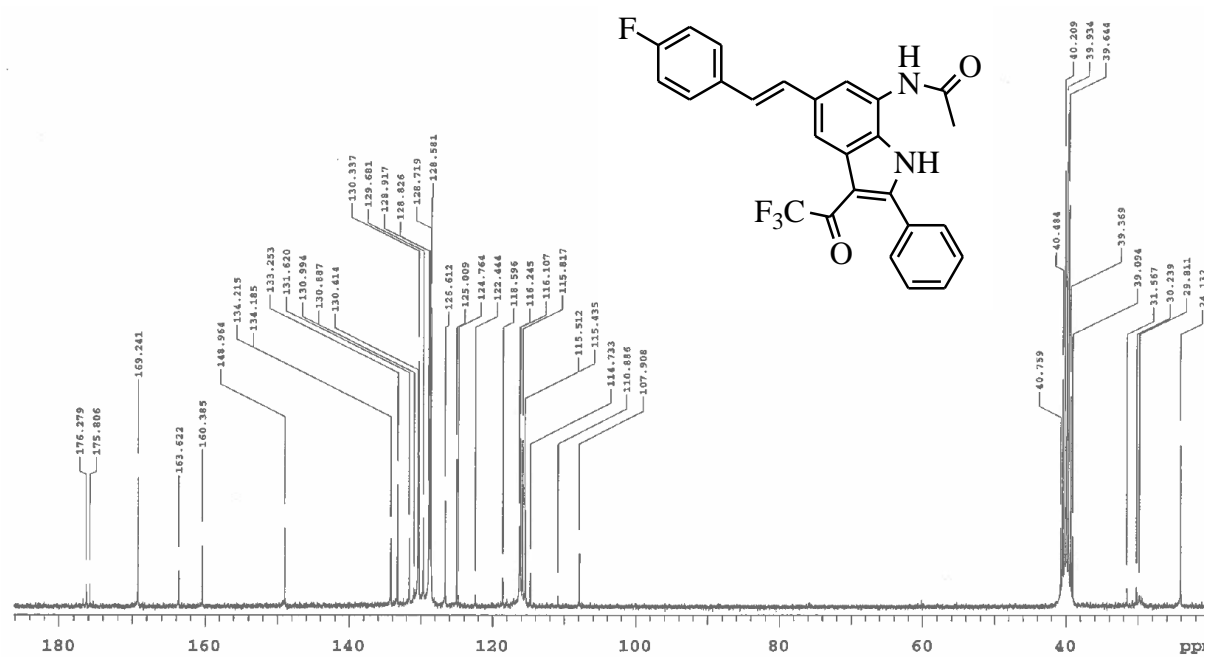

177

178 Figure S42. <sup>13</sup>C NMR Spectrum of Compound 4e in DMSO-*d*<sub>6</sub> at 75 MHz

179

180

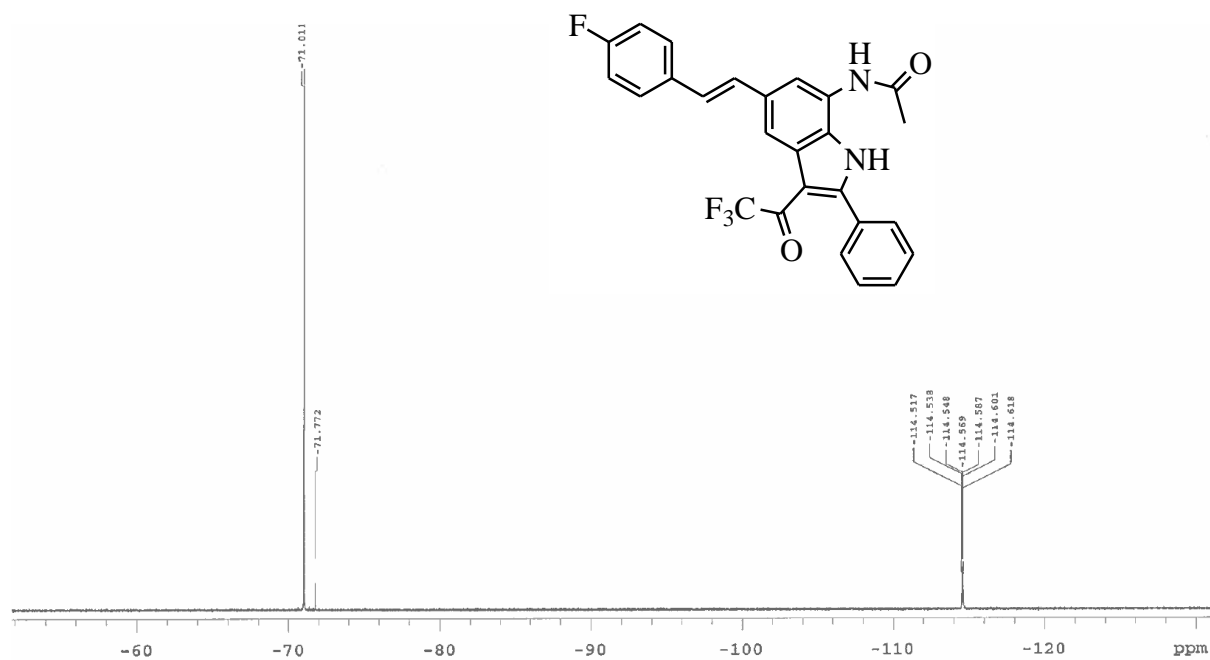

181

182 Figure S43.  $^{19}\text{F}$  NMR Spectrum of Compound 4e in  $\text{DMSO-}d_6$  at 282 MHz

183

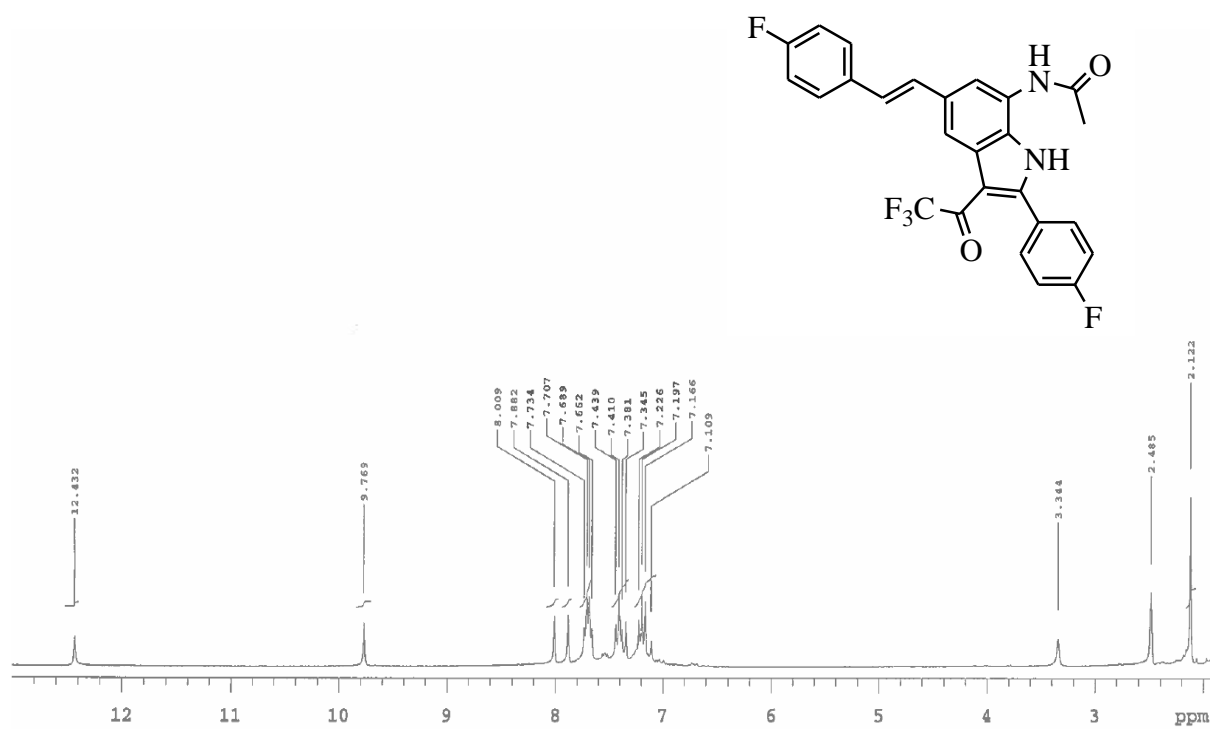

184

185 Figure S44.  $^1\text{H}$  NMR Spectrum of Compound 4f in  $\text{DMSO-}d_6$  at 300 MHz

186

187

188

189

190

191

192

193  
194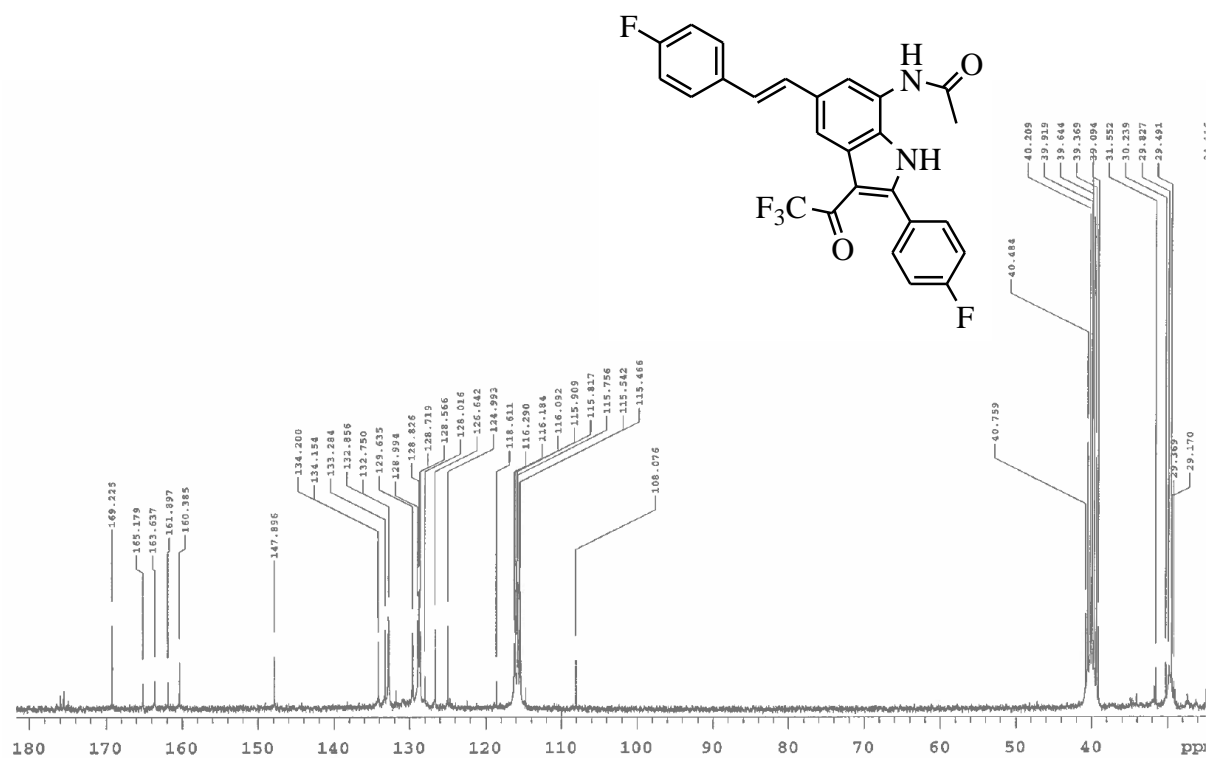195  
196  
197Figure S45. <sup>13</sup>C NMR Spectrum of Compound 4f in DMSO-*d*<sub>6</sub> at 75 MHz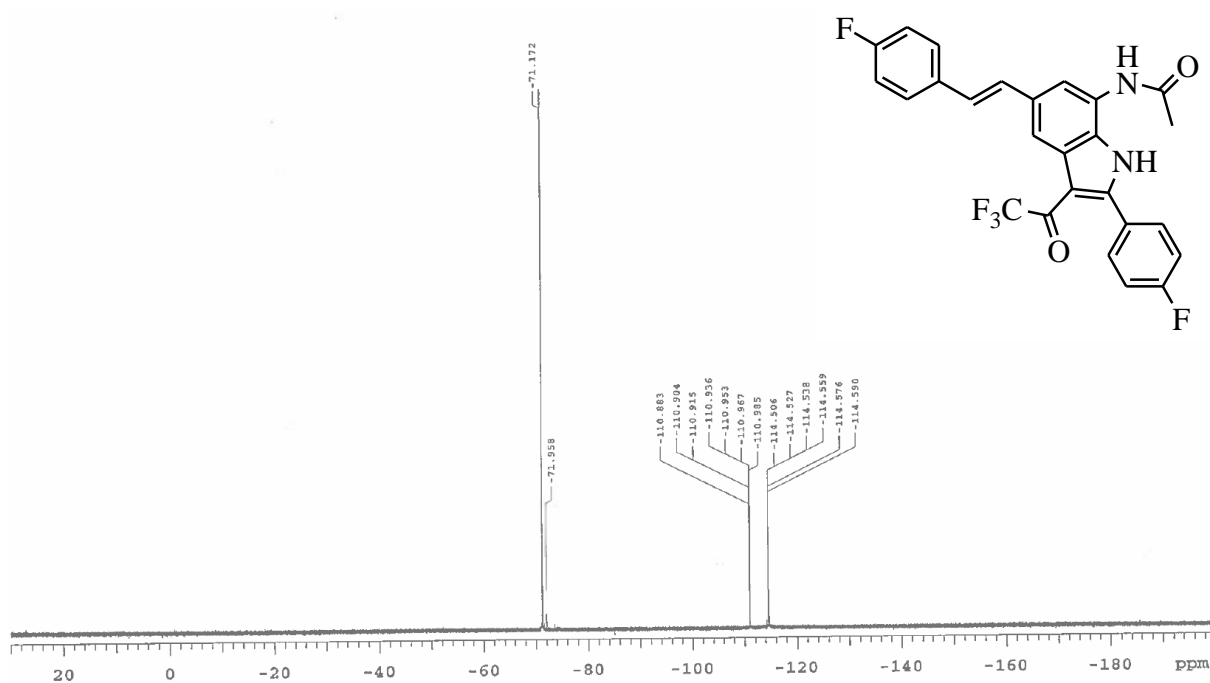198  
199  
200  
201  
202  
203Figure S46. <sup>19</sup>F NMR Spectrum of Compound 4f in DMSO-*d*<sub>6</sub> at 282 MHz



204  
205  
206  
207

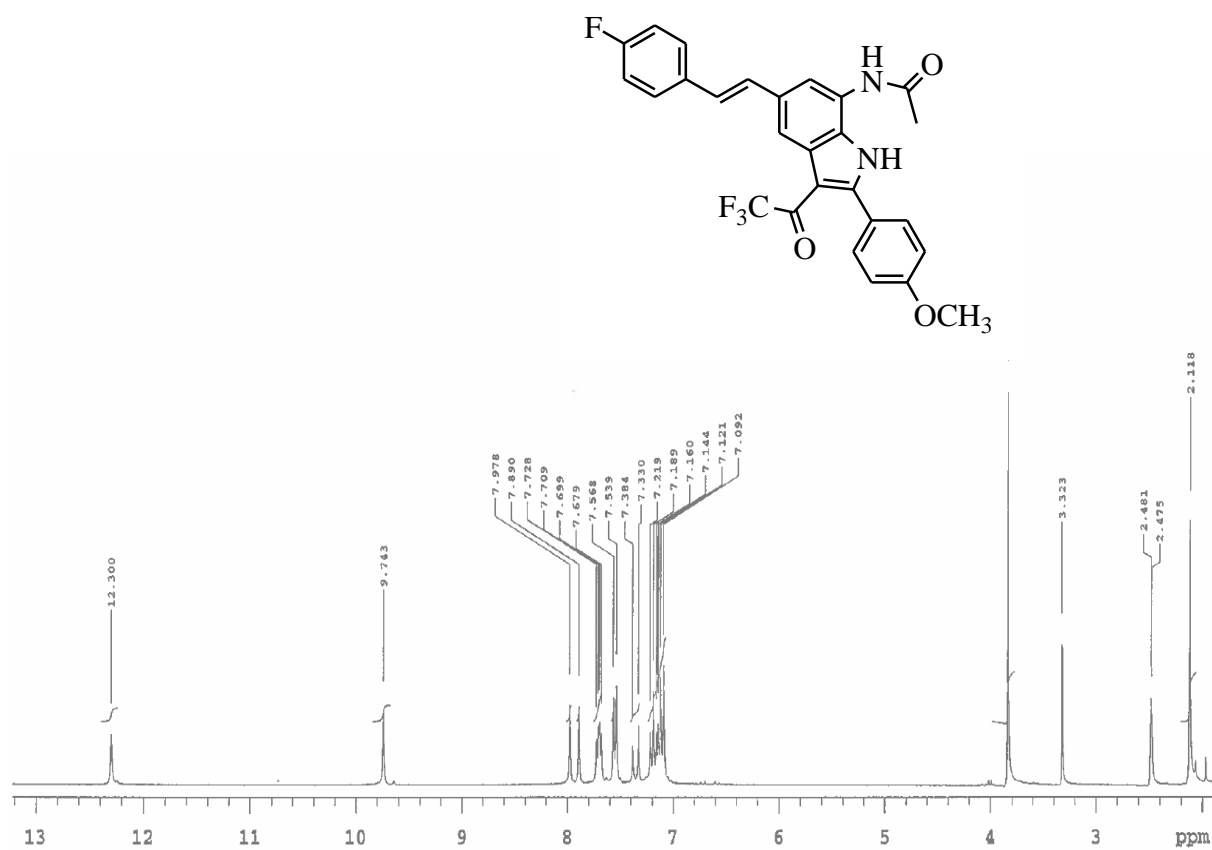

208  
209  
210

Figure S47. <sup>1</sup>H NMR Spectrum of Compound 4g in DMSO-*d*<sub>6</sub> at 300 MHz

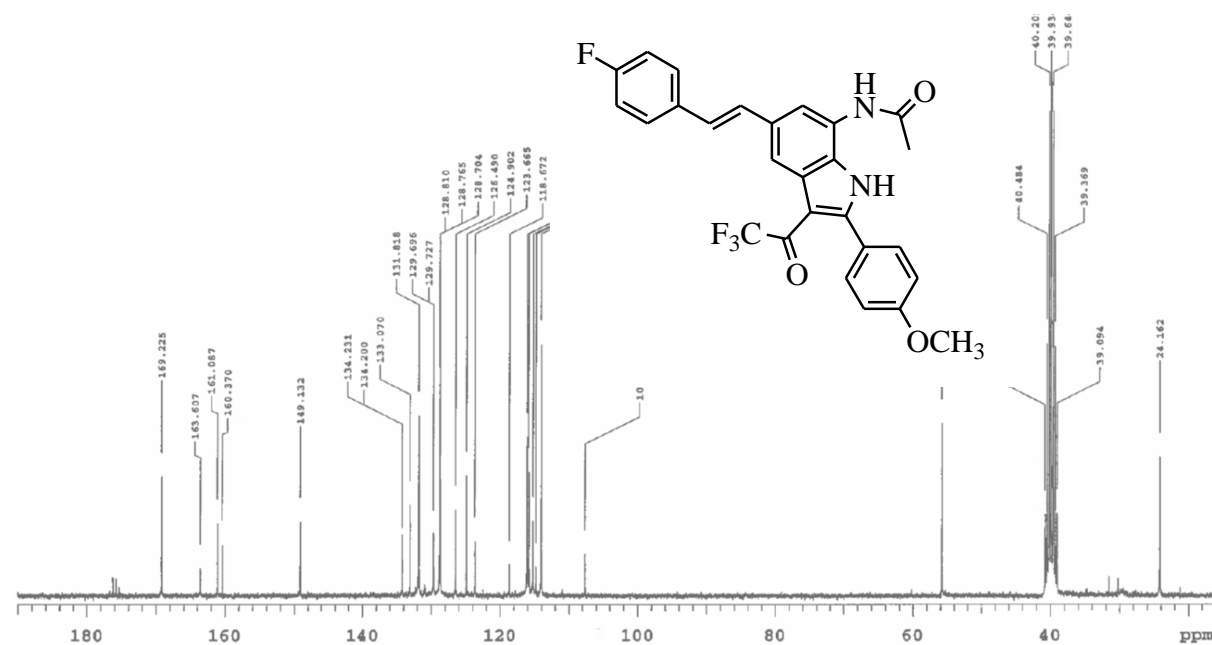

211  
212  
213

Figure S48. <sup>13</sup>C NMR Spectrum of Compound 4g in DMSO-*d*<sub>6</sub> at 75 MHz

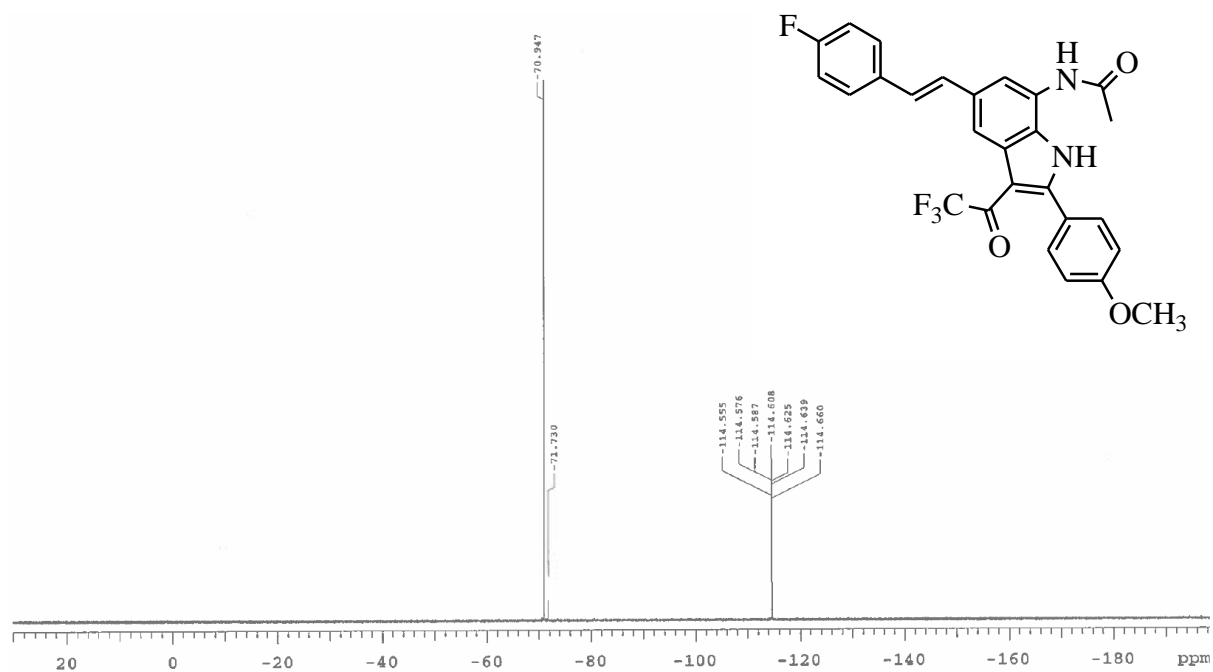

214

215 **Figure S49.  $^{19}\text{F}$  NMR Spectrum of Compound 4g in  $\text{DMSO-}d_6$  at 282 MHz**

216

217

218

219

220

221

222

223

224

225

226

227

228

229

230

231

232

233

234

235

236

237

238

239

240 **Supplementary 2: % cell viability and LC<sub>50</sub> values of chloroquine and compounds 3 and 4**

241

242 **Table 1.** Log solvent percentage vs. % Parasite survival data used to plot dose-response curve for DMSO.

243

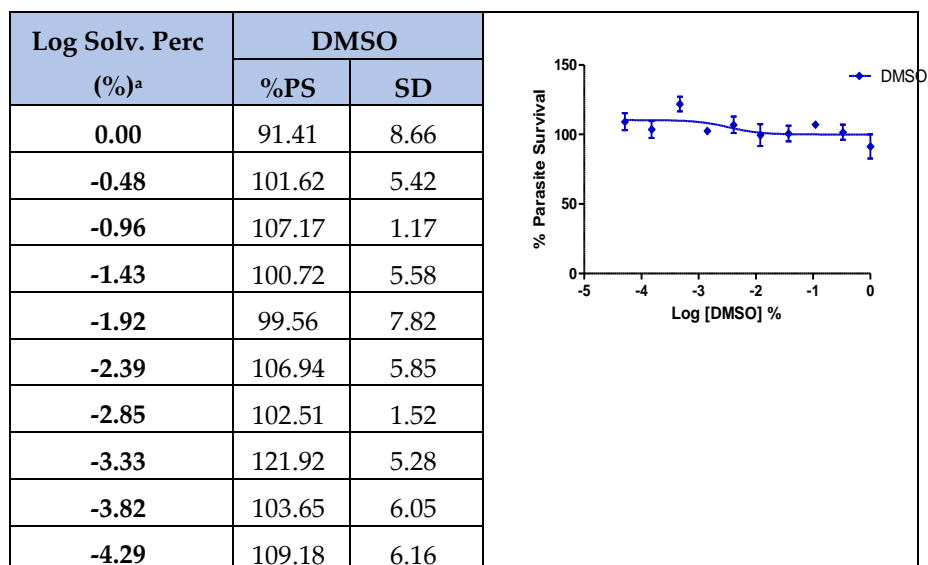

244

245 <sup>a</sup>Data are expressed as means of triplicate values. SD = standard deviation; %PS = Percentage Parasite  
246 Survival.

247

248

249

250

251

252

253

254

255

256

257

258

259

260

261

262

263

264

265

266

267

268

269 **Table 2.** Log concentration vs. % Parasite survival data used to plot dose-response curve for chloroquine

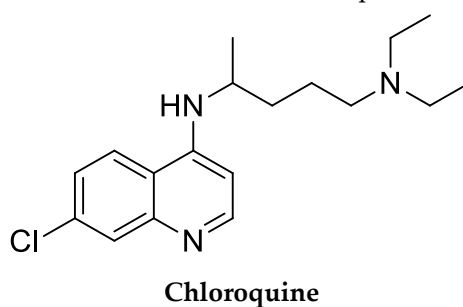

272 **Figure S50.** Chemical structure of chloroquine

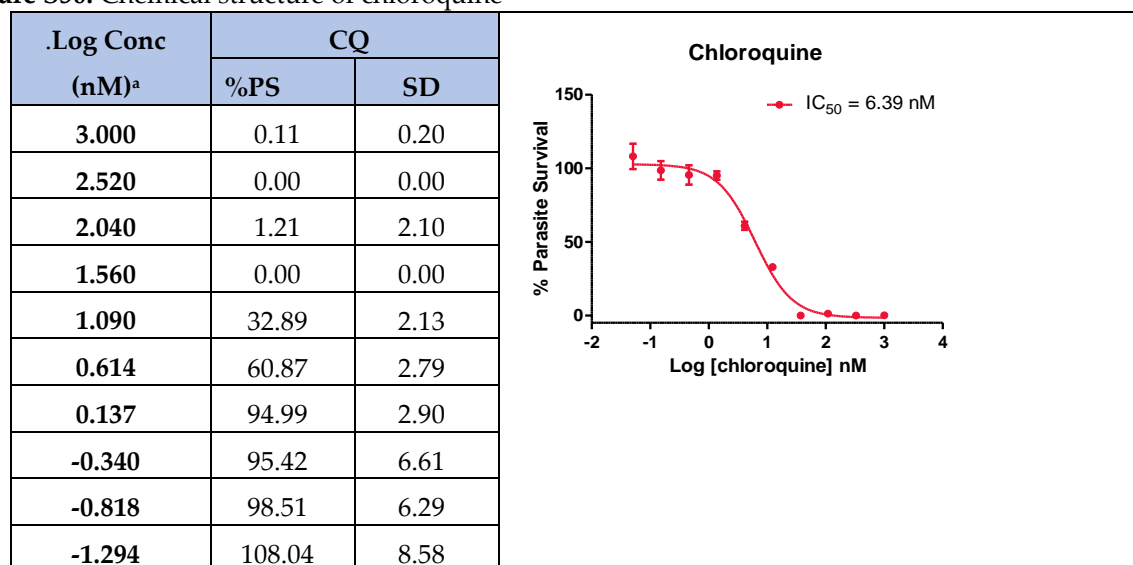

273

274 <sup>a</sup>Data are expressed as means of triplicate values. SD = standard deviation; %PS = Percentage Parasite  
275 Survival.

276

277

278

279

280

281

282

283

284

285

286

287

288

289

290

291

292

293 **Table 3.** Log concentration vs. % Parasite survival data used to plot dose-response curve for **3a**.  
 294

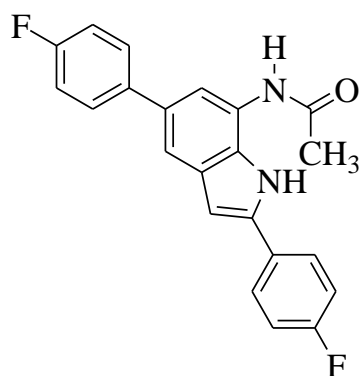

3a

295  
 296  
 297 **Figure S51.** Chemical structure of **3a**  
 298

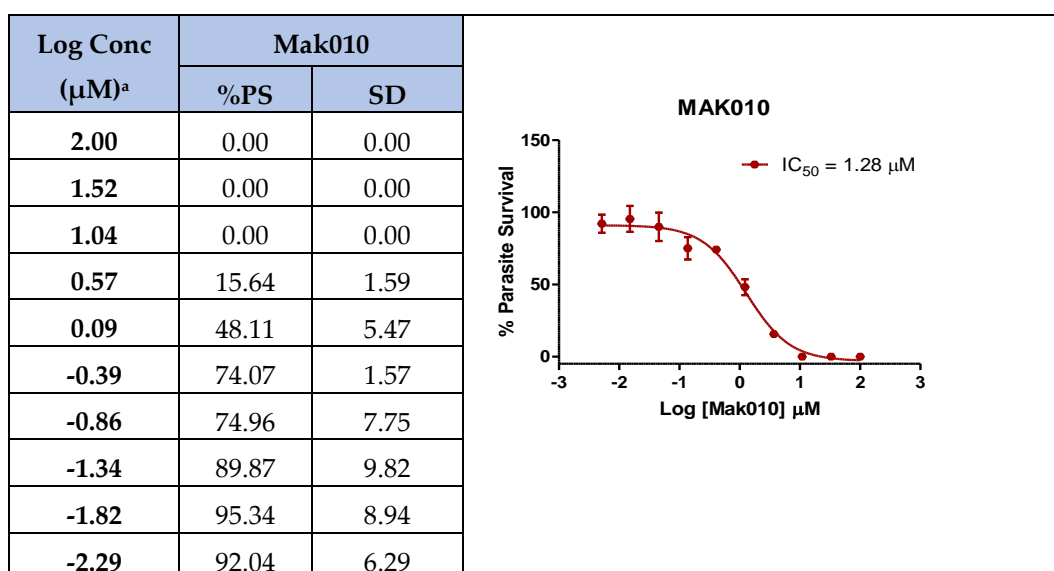

299 <sup>a</sup>Data are expressed as means of triplicate values. SD = standard deviation; %PS = Percentage Parasite  
 300 Survival.

301  
 302  
 303  
 304  
 305  
 306  
 307  
 308  
 309  
 310  
 311  
 312  
 313

314 **Table 4.** Log concentration vs. % Parasite survival data used to plot dose-response curve for **3b**.  
 315

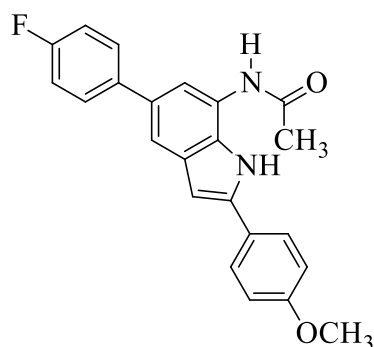

316

317

**3b**318 **Figure S52.** Chemical structure of **3b**

319

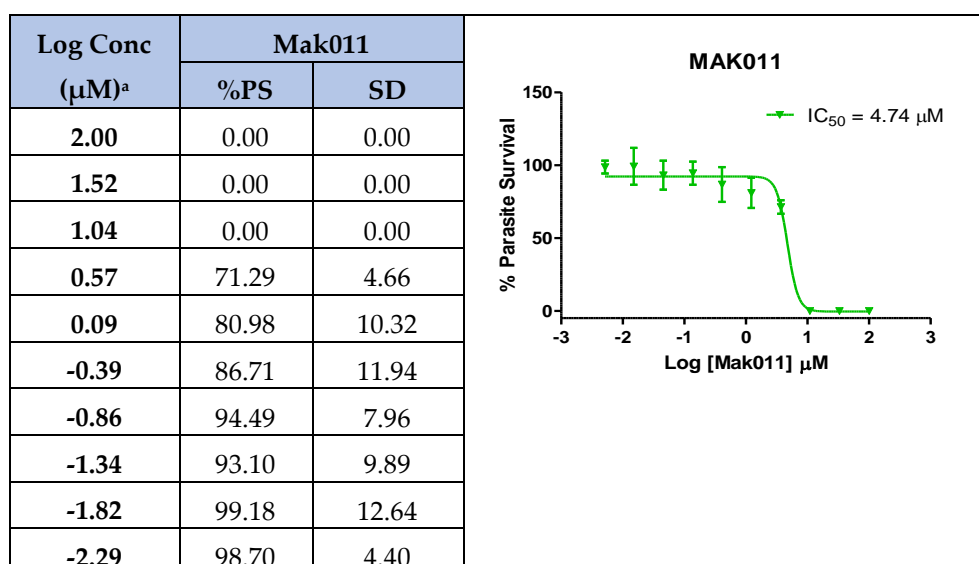

320

321 <sup>a</sup>Data are expressed as means of triplicate values. SD = standard deviation; %PS = Percentage Parasite  
 322 Survival.

323

324

325

326

327

328

329

330

331

332

333

334

335

336 **Table 5.** Log concentration vs. % Parasite survival data used to plot dose-response curve for **3c**.  
 337

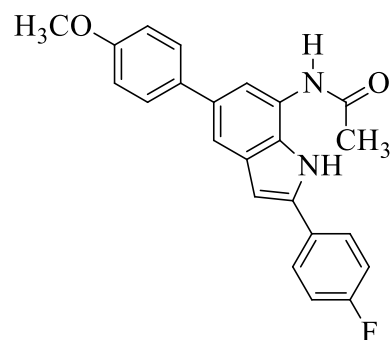

338  
 339  
 340  
 341

**3c**

**Figure S53.** Chemical structure of **3c**

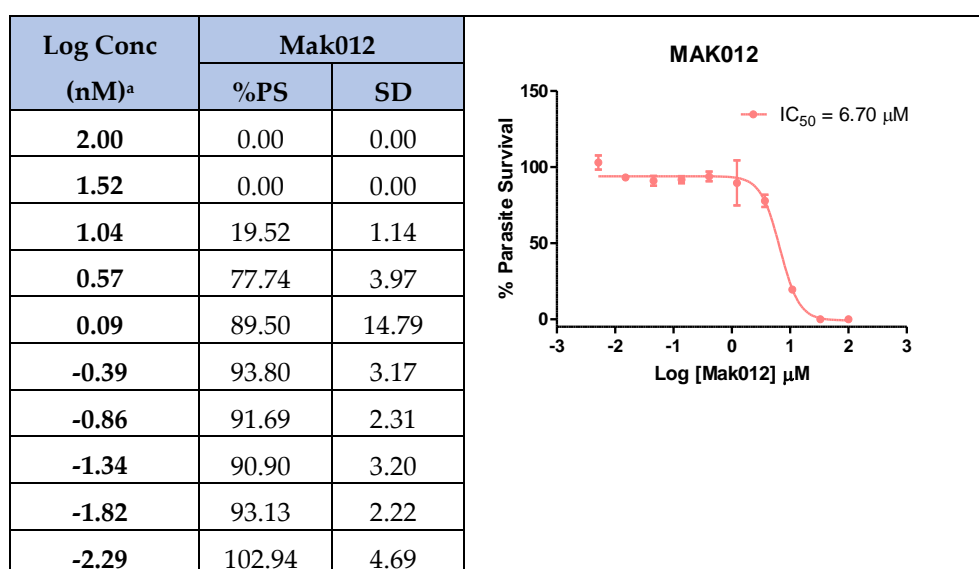

342  
 343  
 344  
 345  
 346  
 347  
 348  
 349  
 350  
 351  
 352  
 353  
 354  
 355  
 356  
 357

<sup>a</sup>Data are expressed as means of triplicate values. SD = standard deviation; %PS = Percentage Parasite Survival.

358 **Table 6.** Log concentration vs. % Parasite survival data used to plot dose-response curve for **3d**.  
 359

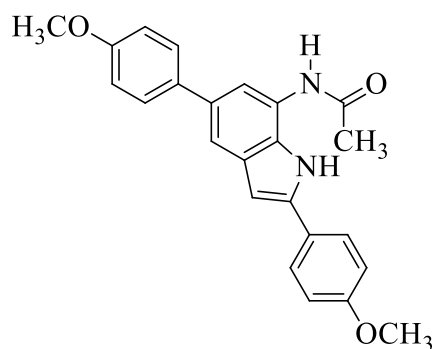

360

361

**3d**362 **Figure S54.** Chemical structure of **3d**

363

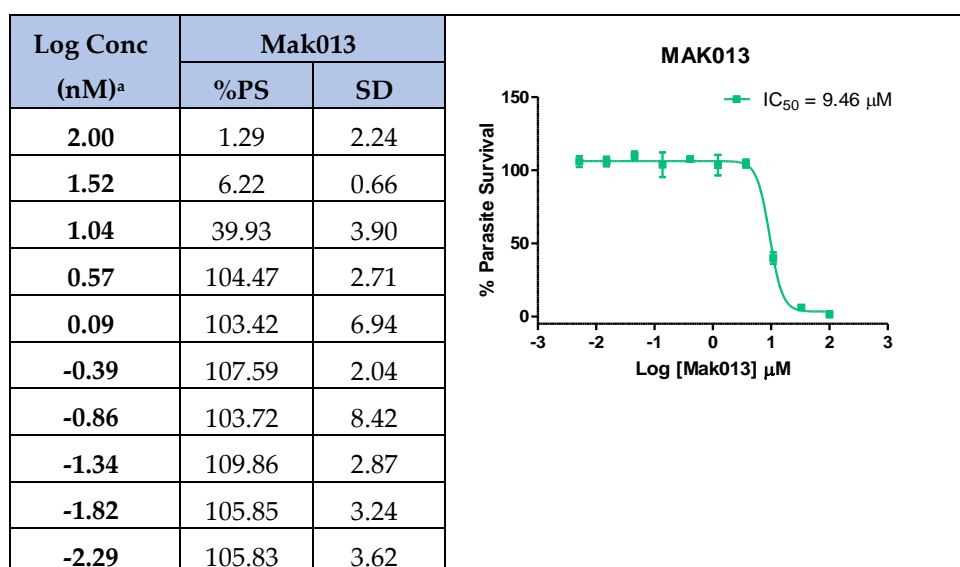

364

365 <sup>a</sup>Data are expressed as means of triplicate values. SD = standard deviation; %PS = Percentage Parasite  
 366 Survival.

367

368

369

370

371

372

373

374

375

376

377

378

379



380 **Table 7.** Log concentration vs. % Parasite survival data used to plot dose-response curve for **3e**.

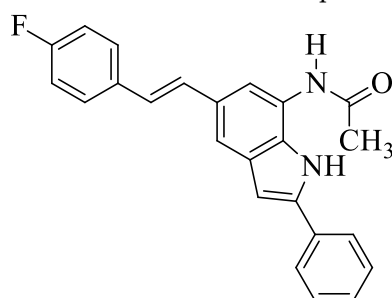

381

382

383

**3e**384 **Figure S55.** Chemical structure of **3e**

385

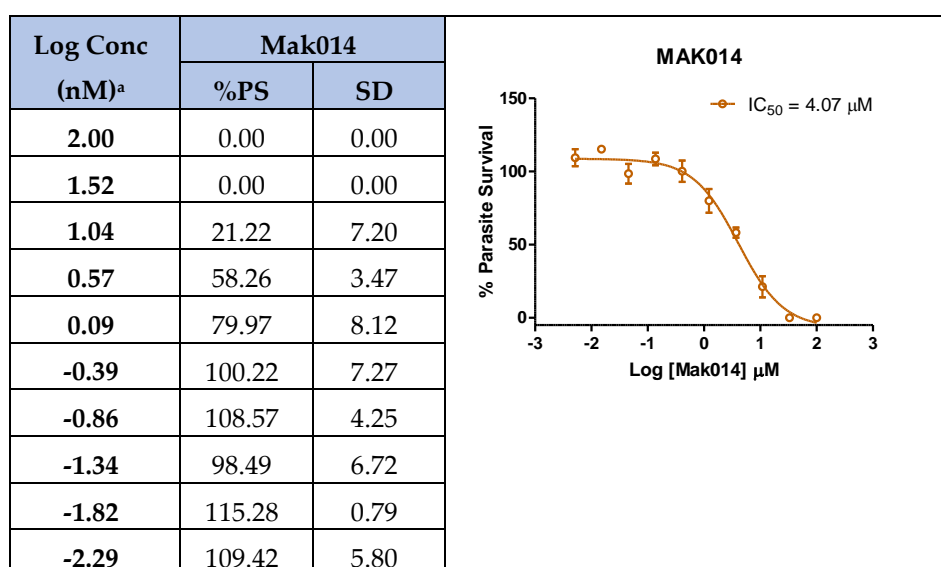

386

387 <sup>a</sup>Data are expressed as means of triplicate values. SD = standard deviation; %PS = Percentage Parasite  
388 Survival.

389

390

391

392

393

394

395

396

397

398

399

400

401

402

403 **Table 8.** Log concentration vs. % Parasite survival data used to plot dose-response curves for **3f**.  
 404

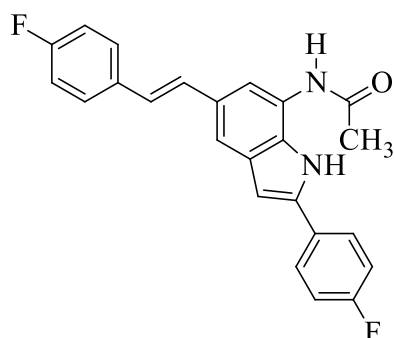

405  
 406 **3f**

407 **Figure S56.** Chemical structure of **3f**

408

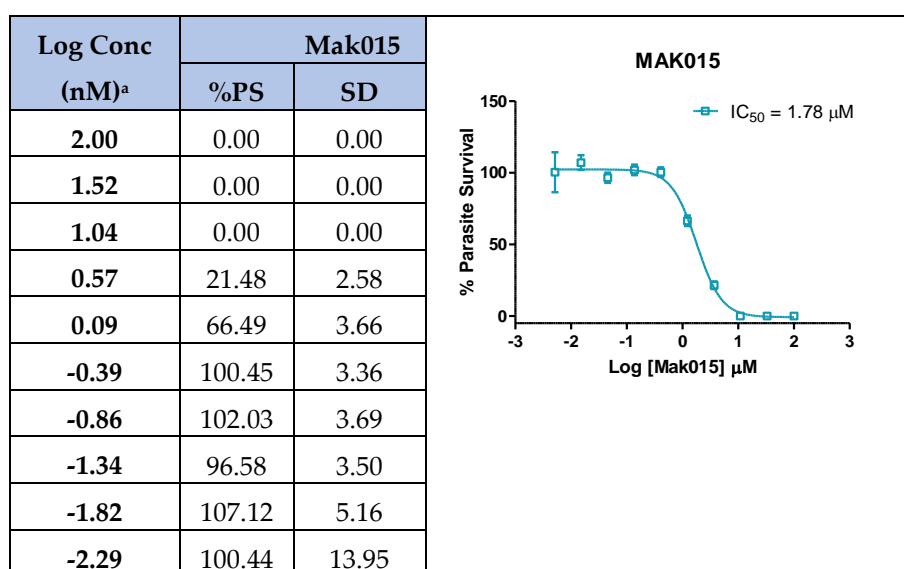

409

410 <sup>a</sup>Data are expressed as means of triplicate values. SD = standard deviation; %PS = Percentage Parasite  
 411 Survival.

412

413

414

415

416

417

418

419

420

421

422

423

424

425 **Table 9.** Log concentration vs. % Parasite survival data used to plot dose-response curve for **3g**.

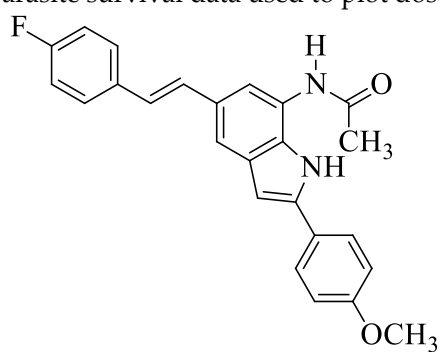

426

427

**3g**

428 **Figure S57.** Chemical structure of **3g**

429

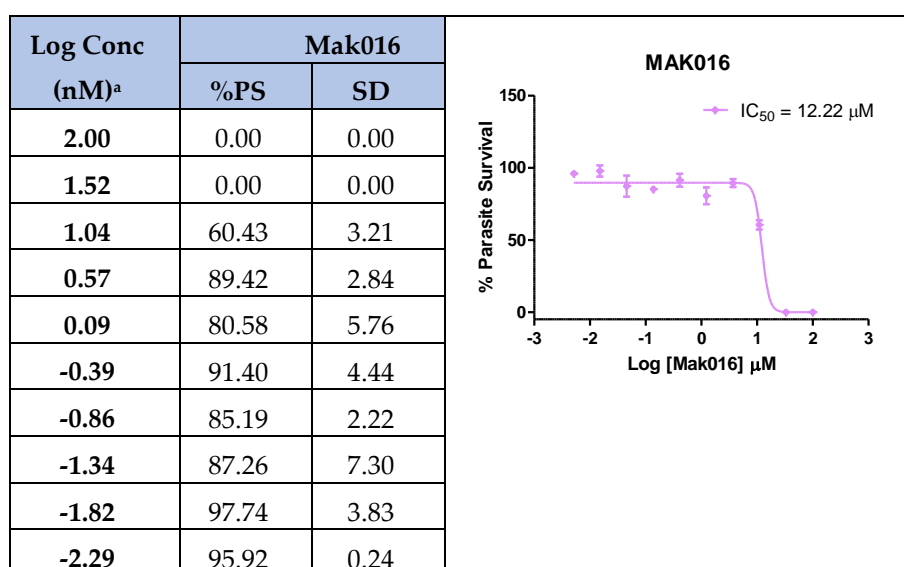

430

431 <sup>a</sup>Data are expressed as means of triplicate values. SD = standard deviation; %PS = Percentage Parasite  
432 Survival.

433

434

435

436

437

438

439

440

441

442

443

444

445

446

447 **Table 10.** Log concentration vs. % Parasite survival data used to plot dose-response curve for **4a**.  
 448

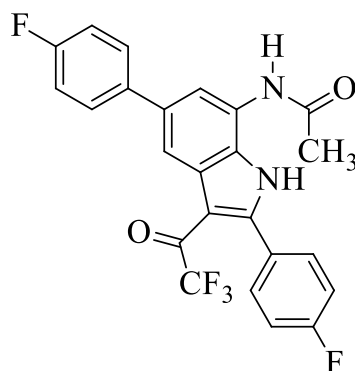

449  
 450  
 451  
 452

**4a**

**Figure S58.** Chemical structure of **4a**

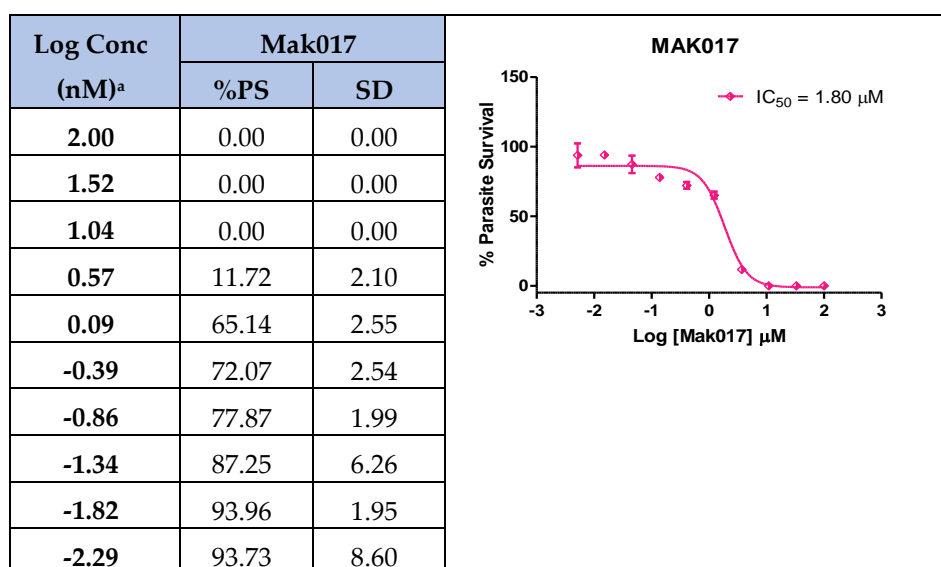

453  
 454  
 455  
 456  
 457  
 458  
 459  
 460  
 461  
 462  
 463  
 464  
 465  
 466  
 467  
 468

<sup>a</sup>Data are expressed as means of triplicate values. SD = standard deviation; %PS = Percentage Parasite Survival.

469 **Table 11.** Log concentration vs. % Parasite survival data used to plot dose-response curve for **4b**.

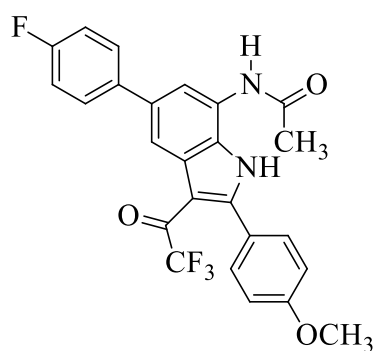

470

471

**4b**

472 **Figure S59.** Chemical structure of **4b**

473

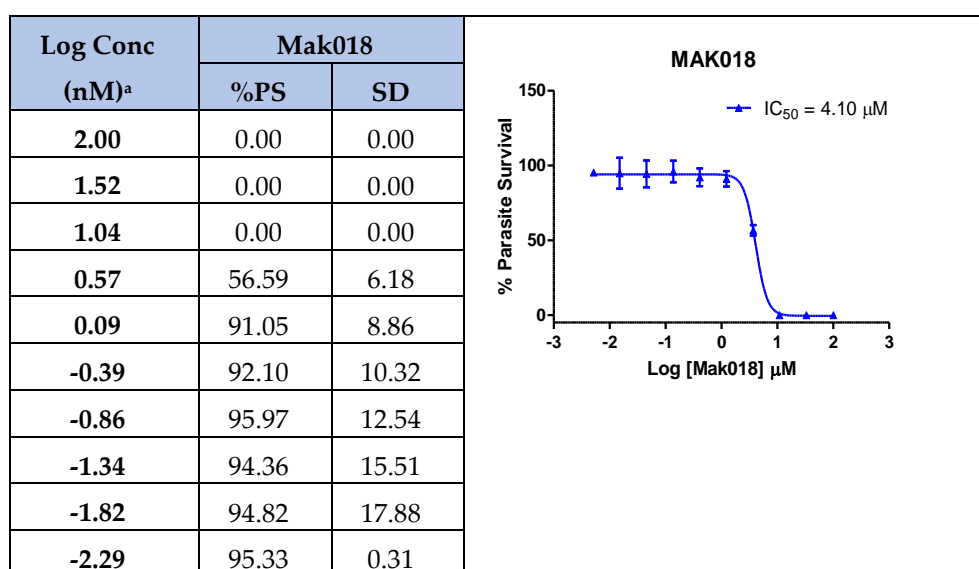

474

475 <sup>a</sup>Data are expressed as means of triplicate values. SD = standard deviation; %PS = Percentage Parasite  
476 Survival.

477

478

479

480

481

482

483

484

485

486

487

488

489

490

491 **Table 12.** Log concentration vs. % Parasite survival data used to plot dose-response curves for **4c**.

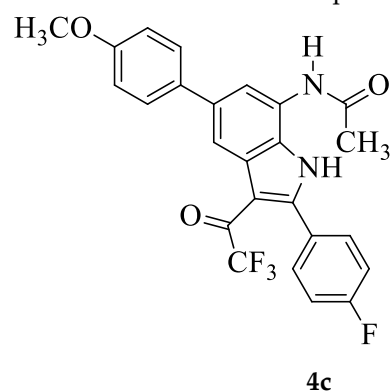

492

493

494 **Figure S60.** Chemical structure of **4c**

495

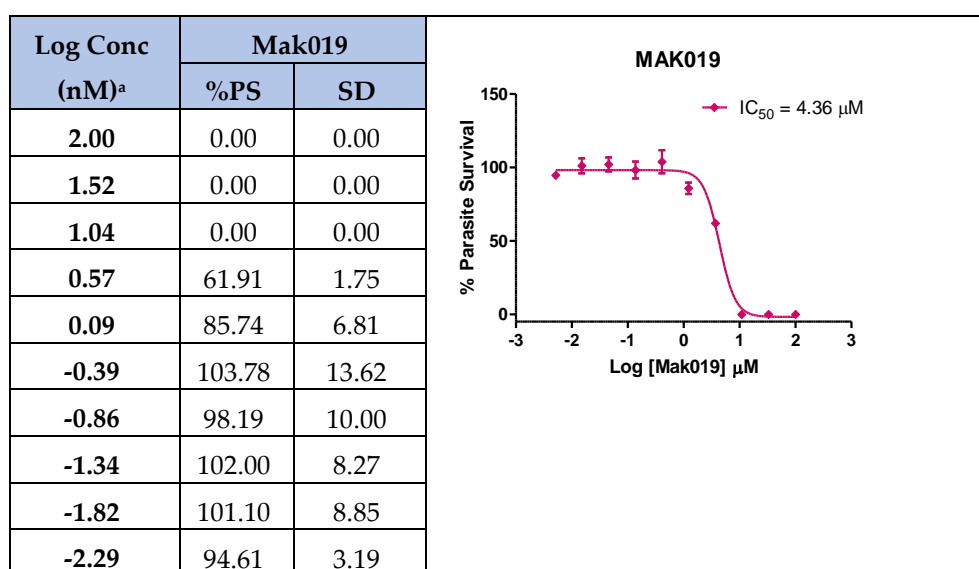

496

497 <sup>a</sup>Data are expressed as means of triplicate values. SD = standard deviation; %PS = Percentage Parasite  
498 Survival.

499

500

501

502

503

504

505

506

507

508

509

510

511

512

513 **Table 13.** Log concentration vs. % Parasite survival data used to plot dose-response curve for **4d**.

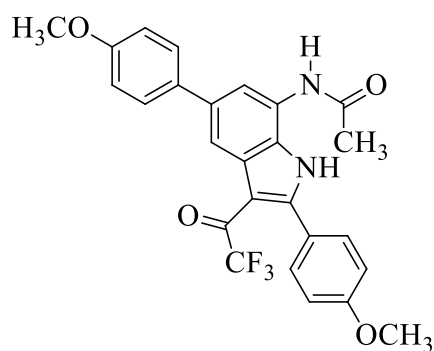

514

515

**4d**

516 **Figure S61.** Chemical structure of **4d**

517

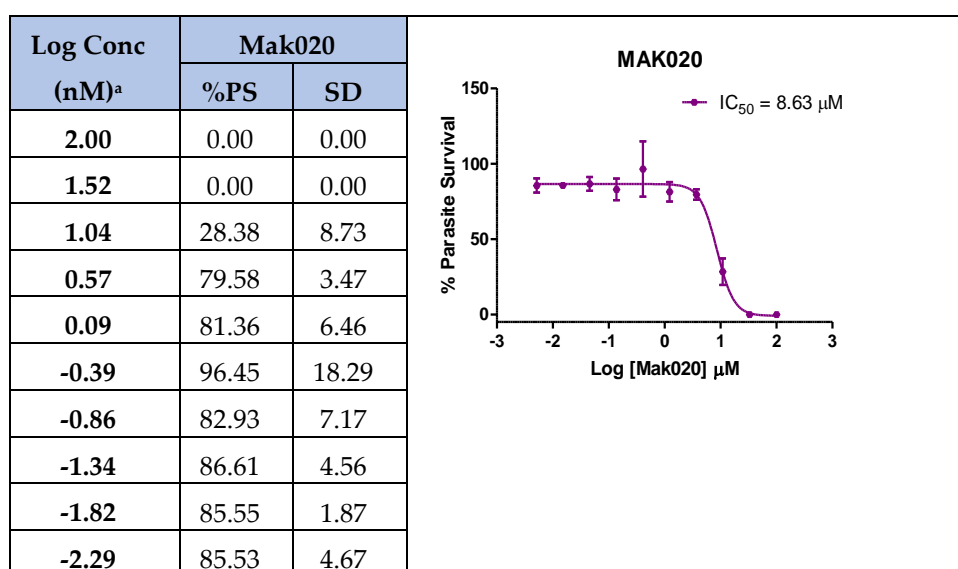

518

519 <sup>a</sup>Data are expressed as means of triplicate values. SD = standard deviation; %PS = Percentage Parasite  
520 Survival.

521

522

523

524

525

526

527

528

529

530

531

532

533

534

535 **Table 14.** Log concentration vs. % Parasite survival data used to plot dose-response curve for **4e**.  
 536

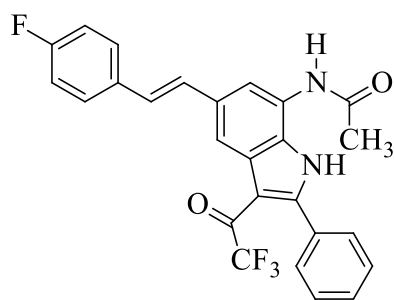

537  
 538

**4e**

539 **Figure S62.** Chemical structure of **4e**  
 540

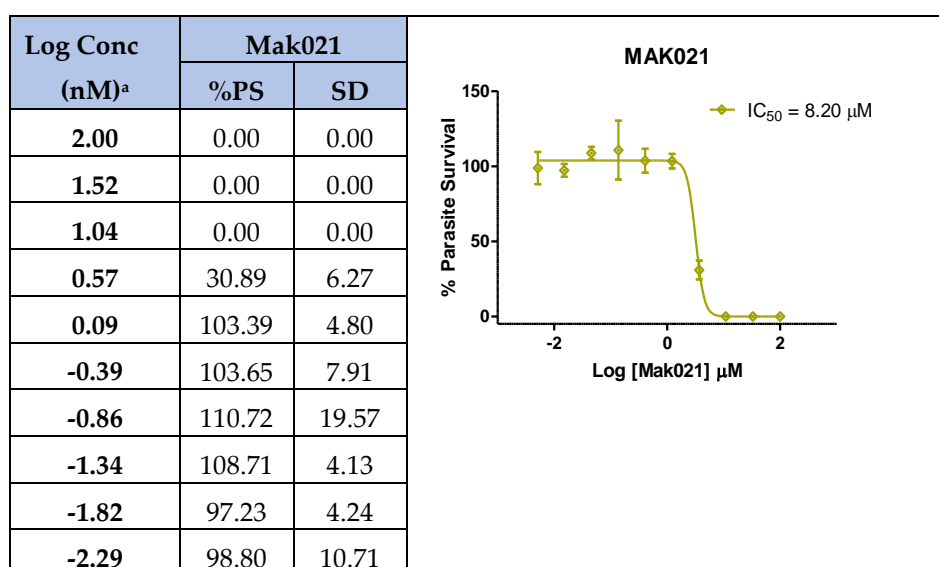

541

542 <sup>a</sup>Data are expressed as means of triplicate values. SD = standard deviation; %PS = Percentage Parasite  
 543 Survival.

544

545

546

547

548

549

550

551

552

553

554

555

556

557



558 **Table 15.** Log concentration vs. % Parasite survival data used to plot dose-response curve for **4f**.

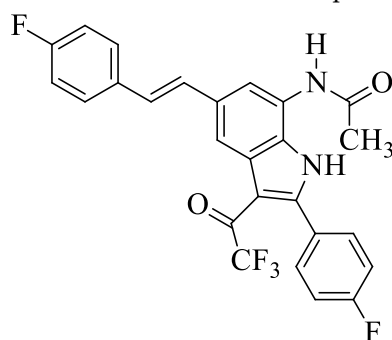

559

560

**4f**561 **Figure S63.** Chemical structure of **4f**

562

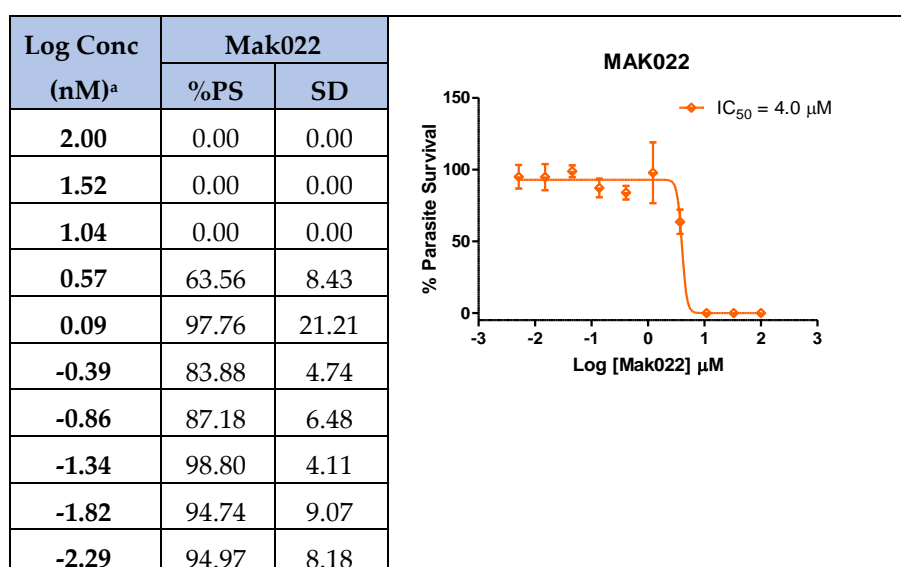

563

564 <sup>a</sup>Data are expressed as means of triplicate values. SD = standard deviation; %PS = Percentage Parasite  
565 Survival.

566

567

568

569

570

571

572

573

574

575

576

577

578

579

580 **Table 16.** Log concentration vs. % Parasite survival data used to plot dose-response curve for **4g**.

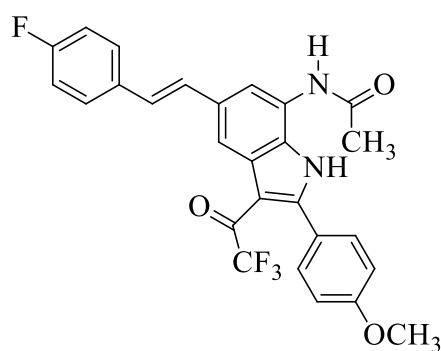

581

582

**4g**

583 **Figure S64.** Chemical structure of **4g**

584

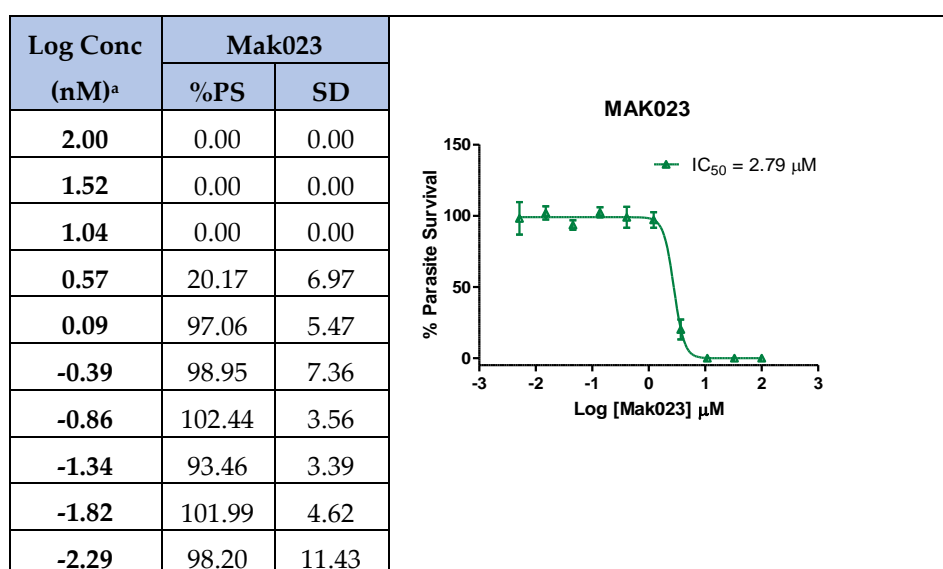

585

586 <sup>a</sup>Data are expressed as means of triplicate values. SD = standard deviation; %PS = Percentage Parasite  
587 Survival.

588

589

590

591

592

593

594

595

596

597

598

599

600

601

602 **Supplementary 3: % cell viability of Vero cells exposed Doxorubicin chloride, 3a, 3f, 4a and 4g**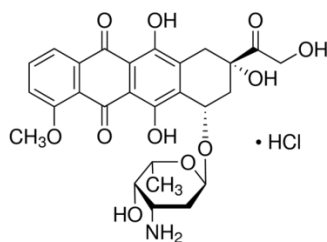

603

604

**Doxorubicin hydrochloride**605 **Table 17:** Percentage cell viability of Vero cells exposed to different concentrations of Doxorubicin  
606 hydrochloride

| Conc. ( $\mu\text{M}$ ) | % Viability | SD   |
|-------------------------|-------------|------|
| 100                     | 44.05       | 3.44 |
| 10                      | 63.48       | 0.93 |
| 1                       | 75.68       | 4.77 |
| 0.1                     | 87.74       | 3.35 |
| 0.01                    | 95.00       | 4.86 |
| 0.001                   | 100.00      | 4.01 |

607

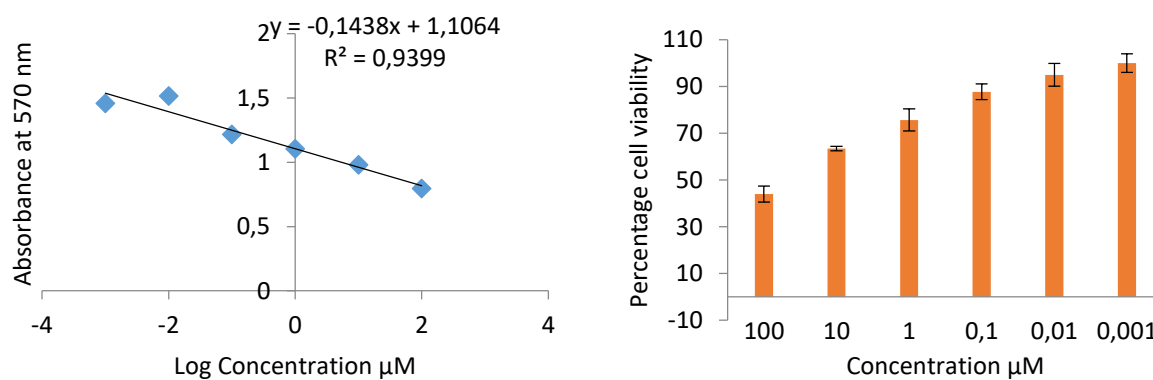

608

609 **Figure S65.** Linear regression plots and percentage cell viability graphs Vero cells exposed to different  
610 concentrations of doxorubicin hydrochloride

611

612 **Table 18:** Percentage cell viability of Vero cells exposed to different concentrations of **3a**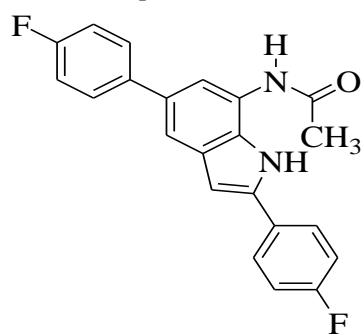

613

614

**3a**

| Conc. ( $\mu\text{g/ml}$ ) | %Viability | SD   |
|----------------------------|------------|------|
| 100                        | 26.13      | 0.48 |
| 10                         | 51.69      | 2.71 |
| 1                          | 86.54      | 2.98 |
| 0.1                        | 100.00     | 1.44 |

615

616

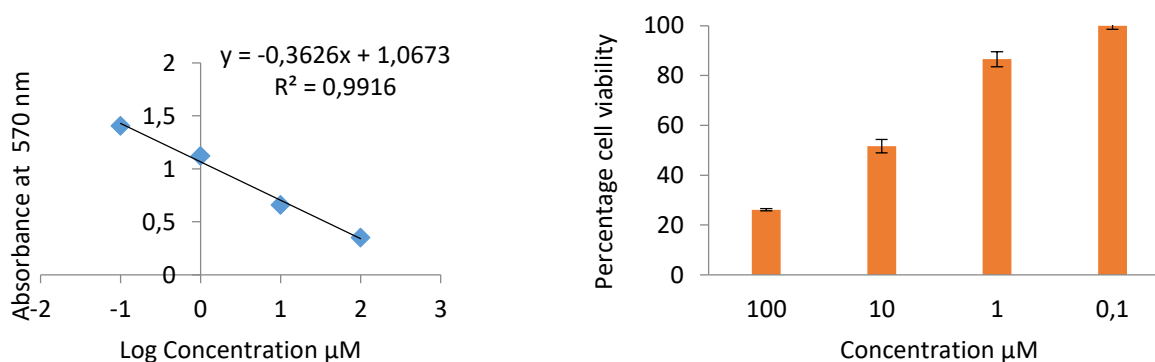618 **Figure S66.** Linear regression plots and percentage cell viability graphs of Vero cells exposed to different  
619 concentrations of **3a**

620

621

622

623

624

625

626

627

628

629

630

631

632 **Table 19:** Percentage cell viability of Vero cells exposed to different concentrations of **3f**

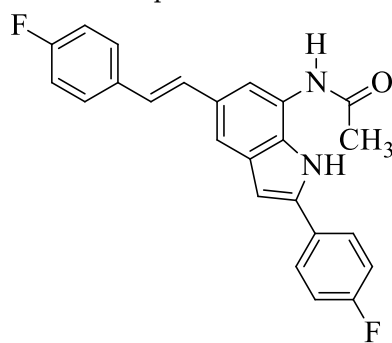

633  
634

**3f**

| Conc. ( $\mu\text{g/ml}$ ) | % Viability | SD   |
|----------------------------|-------------|------|
| 100                        | 13.76       | 7.23 |
| 10                         | 94.81       | 1.81 |
| 1                          | 98.5        | 0.71 |
| 0.1                        | 99.00       | 1.41 |

635

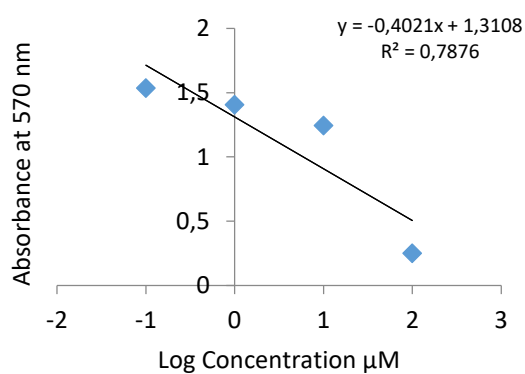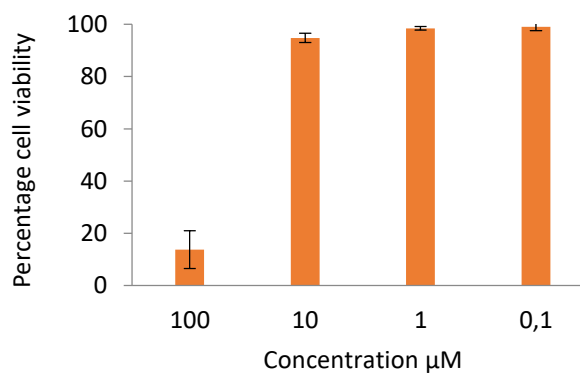

636  
637  
638  
639  
640  
641

**Figure S67.** Linear regression plots and percentage cell viability graphs of Vero cells exposed to different concentrations of **3f**

642 **Table 20:** Percentage cell viability of Vero cells exposed to different concentrations of **4a**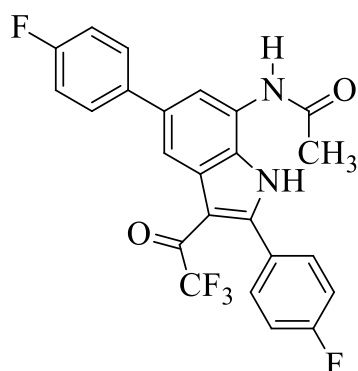

643

644

**4a**

| Conc. ( $\mu\text{g/ml}$ ) | %Viability | SD   |
|----------------------------|------------|------|
| 100                        | 5.45       | 0.16 |
| 10                         | 96.5       | 2.12 |
| 1                          | 98.50      | 0.71 |
| 0.1                        | 99.5       | 0.71 |

645

646

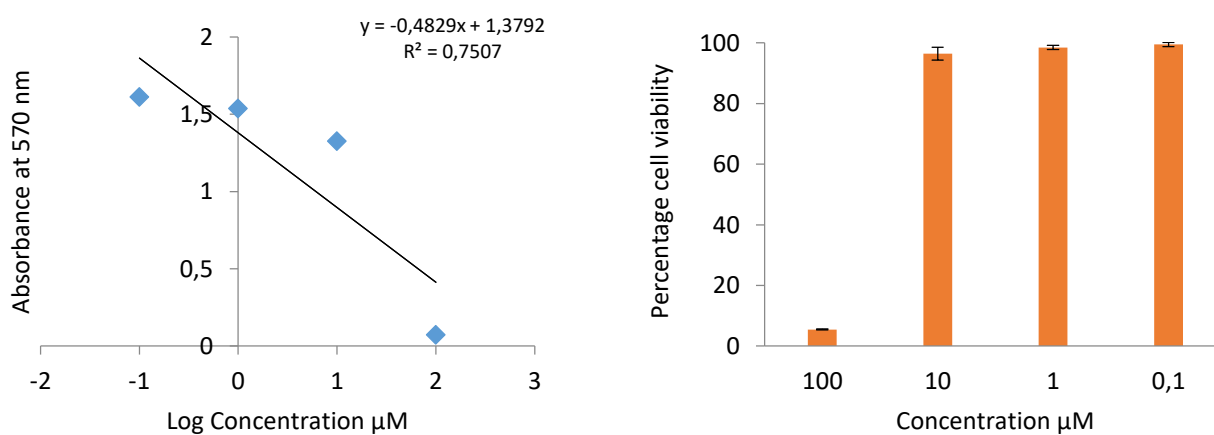648 **Figure S68.** Linear regression plots and percentage cell viability graphs of Vero cells exposed to different  
649 concentrations of **4a**

650

651

652

653

654

655

656

657

658

659

660 **Table 21:** Percentage cell viability of Vero cells exposed to different concentrations of **4g**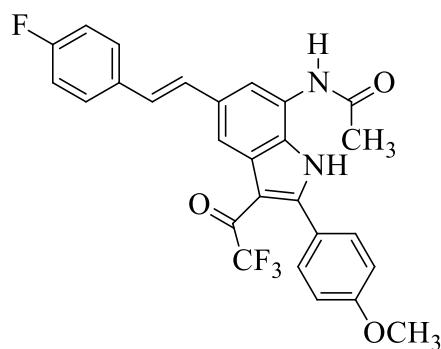

661

662

**4g**

| Conc. ( $\mu\text{g/ml}$ ) | % Viability | SD   |
|----------------------------|-------------|------|
| 100                        | 35.56       | 0.37 |
| 10                         | 98.5        | 0.71 |
| 1                          | 99.00       | 0.71 |
| 0.1                        | 99.50       | 1.41 |

663

664

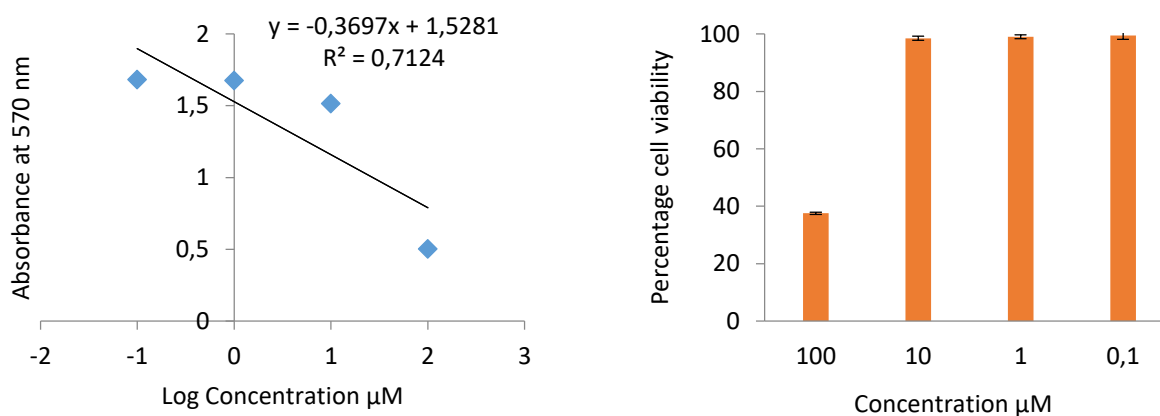666 **Figure S69.** Linear regression plots and percentage cell viability graphs of Vero cells exposed to different  
667 concentrations of **4g**

668

669

670

671

672

673

674

675

676

677

678 **Supplementary 4: Crystal data and structure refinement, bond lengths and torsion angles of 4g**  
 679

680 **Table 22. Crystal data and structure refinement for 4g**

|     |                                   |                                                                              |                 |
|-----|-----------------------------------|------------------------------------------------------------------------------|-----------------|
| 681 | Identification code               | 16a_mak001_p                                                                 |                 |
| 682 | Empirical formula                 | C <sub>27</sub> H <sub>20</sub> F <sub>4</sub> N <sub>2</sub> O <sub>3</sub> |                 |
| 683 | Formula weight                    | 496.45                                                                       |                 |
| 684 | Temperature                       | 173(2) K                                                                     |                 |
| 685 | Wavelength                        | 0.71073 Å                                                                    |                 |
| 686 | Crystal system                    | Triclinic                                                                    |                 |
| 687 | Space group                       | P-1                                                                          |                 |
| 688 | Unit cell dimensions              | a = 11.1351(10) Å                                                            | α = 68.965(3)°. |
| 689 |                                   | b = 14.9334(13) Å                                                            | β = 72.856(3)°. |
| 690 |                                   | c = 18.7080(16) Å                                                            | γ = 68.716(3)°. |
| 691 | Volume                            | 2656.7(4) Å <sup>3</sup>                                                     |                 |
| 692 | Z                                 | 4                                                                            |                 |
| 693 | Density (calculated)              | 1.241 Mg/m <sup>3</sup>                                                      |                 |
| 694 | Absorption coefficient            | 0.100 mm <sup>-1</sup>                                                       |                 |
| 695 | F(000)                            | 1024                                                                         |                 |
| 696 | Crystal size                      | 0.40 x 0.13 x 0.04 mm <sup>3</sup>                                           |                 |
| 697 | Theta range for data collection   | 3.06 to 25.50°.                                                              |                 |
| 698 | Index ranges                      | -11 ≤ h ≤ 13, -17 ≤ k ≤ 18, -22 ≤ l ≤ 22                                     |                 |
| 699 | Reflections collected             | 26244                                                                        |                 |
| 700 | Independent reflections           | 9846 [R(int) = 0.0581]                                                       |                 |
| 701 | Completeness to theta = 25.50°    | 99.5 %                                                                       |                 |
| 702 | Absorption correction             | Semi-empirical from equivalents                                              |                 |
| 703 | Max. and min. transmission        | 0.9960 and 0.9610                                                            |                 |
| 704 | Refinement method                 | Full-matrix least-squares on F <sup>2</sup>                                  |                 |
| 705 | Data / restraints / parameters    | 9846 / 0 / 649                                                               |                 |
| 706 | Goodness-of-fit on F <sup>2</sup> | 1.077                                                                        |                 |
| 707 | Final R indices [I > 2σ(I)]       | R1 = 0.0788, wR2 = 0.2115                                                    |                 |
| 708 | R indices (all data)              | R1 = 0.1203, wR2 = 0.2286                                                    |                 |
| 709 | Largest diff. peak and hole       | 0.432 and -0.390 e.Å <sup>-3</sup>                                           |                 |
| 710 |                                   |                                                                              |                 |



711

712 **Table 23. Bond lengths [Å] and angles [°] for 4g**

713

---

|     |             |          |
|-----|-------------|----------|
| 714 | C(1)-C(2)   | 1.355(6) |
| 715 | C(1)-C(6)   | 1.356(6) |
| 716 | C(1)-F(1)   | 1.359(4) |
| 717 | C(2)-C(3)   | 1.406(6) |
| 718 | C(2)-H(2A)  | 0.9500   |
| 719 | C(3)-C(4)   | 1.359(6) |
| 720 | C(3)-H(3A)  | 0.9500   |
| 721 | C(4)-C(5)   | 1.404(6) |
| 722 | C(4)-C(7)   | 1.468(5) |
| 723 | C(5)-C(6)   | 1.369(5) |
| 724 | C(5)-H(5)   | 0.9500   |
| 725 | C(6)-H(6)   | 0.9500   |
| 726 | C(7)-C(8)   | 1.286(6) |
| 727 | C(7)-H(7)   | 0.9500   |
| 728 | C(8)-C(9)   | 1.482(5) |
| 729 | C(8)-H(8)   | 0.9500   |
| 730 | C(9)-C(10)  | 1.390(5) |
| 731 | C(9)-C(14)  | 1.411(5) |
| 732 | C(10)-C(11) | 1.402(5) |
| 733 | C(10)-H(10) | 0.9500   |
| 734 | C(11)-C(12) | 1.397(5) |
| 735 | C(11)-C(15) | 1.445(5) |
| 736 | C(12)-N(1)  | 1.387(4) |
| 737 | C(12)-C(13) | 1.394(5) |
| 738 | C(13)-C(14) | 1.367(5) |
| 739 | C(13)-N(2)  | 1.409(5) |
| 740 | C(14)-H(14) | 0.9500   |
| 741 | C(15)-C(16) | 1.407(5) |
| 742 | C(15)-C(17) | 1.457(5) |
| 743 | C(16)-N(1)  | 1.373(4) |
| 744 | C(16)-C(19) | 1.464(5) |
| 745 | C(17)-O(1)  | 1.208(4) |
| 746 | C(17)-C(18) | 1.534(5) |
| 747 | C(18)-F(4)  | 1.317(4) |
| 748 | C(18)-F(2)  | 1.336(4) |
| 749 | C(18)-F(3)  | 1.355(4) |

|     |              |          |
|-----|--------------|----------|
| 750 | C(19)-C(20)  | 1.402(5) |
| 751 | C(19)-C(24)  | 1.403(5) |
| 752 | C(20)-C(21)  | 1.375(5) |
| 753 | C(20)-H(20)  | 0.9500   |
| 754 | C(21)-C(22)  | 1.397(5) |
| 755 | C(21)-H(21)  | 0.9500   |
| 756 | C(22)-O(3)   | 1.358(4) |
| 757 | C(22)-C(23)  | 1.380(5) |
| 758 | C(23)-C(24)  | 1.392(5) |
| 759 | C(23)-H(23)  | 0.9500   |
| 760 | C(24)-H(24)  | 0.9500   |
| 761 | C(25)-O(3)   | 1.431(4) |
| 762 | C(25)-H(25A) | 0.9800   |
| 763 | C(25)-H(25B) | 0.9800   |
| 764 | C(25)-H(25C) | 0.9800   |
| 765 | C(26)-O(2)   | 1.208(5) |
| 766 | C(26)-N(2)   | 1.366(5) |
| 767 | C(26)-C(27)  | 1.531(6) |
| 768 | N(1)-H(1)    | 0.8800   |
| 769 | N(2)-H(2)    | 0.8800   |
| 770 | C(27)-H(27A) | 0.9800   |
| 771 | C(27)-H(27B) | 0.9800   |
| 772 | C(27)-H(27C) | 0.9800   |
| 773 | C(28)-C(33)  | 1.360(6) |
| 774 | C(28)-C(29)  | 1.361(5) |
| 775 | C(28)-F(5)   | 1.365(4) |
| 776 | C(29)-C(30)  | 1.374(5) |
| 777 | C(29)-H(29)  | 0.9500   |
| 778 | C(30)-C(31)  | 1.395(5) |
| 779 | C(30)-H(30)  | 0.9500   |
| 780 | C(31)-C(32)  | 1.403(5) |
| 781 | C(31)-C(34)  | 1.470(5) |
| 782 | C(32)-C(33)  | 1.388(5) |
| 783 | C(32)-H(32)  | 0.9500   |
| 784 | C(33)-H(33)  | 0.9500   |
| 785 | C(34)-C(35)  | 1.338(5) |
| 786 | C(34)-H(34)  | 0.9500   |
| 787 | C(35)-C(36)  | 1.468(5) |
| 788 | C(35)-H(35)  | 0.9500   |

|     |              |          |
|-----|--------------|----------|
| 789 | C(36)-C(37)  | 1.394(5) |
| 790 | C(36)-C(41)  | 1.419(5) |
| 791 | C(37)-C(38)  | 1.390(5) |
| 792 | C(37)-H(37)  | 0.9500   |
| 793 | C(38)-C(39)  | 1.403(5) |
| 794 | C(38)-C(42)  | 1.455(5) |
| 795 | C(39)-N(3)   | 1.384(4) |
| 796 | C(39)-C(40)  | 1.394(5) |
| 797 | C(40)-C(41)  | 1.381(5) |
| 798 | C(40)-N(4)   | 1.416(4) |
| 799 | C(41)-H(41)  | 0.9500   |
| 800 | C(42)-C(43)  | 1.396(5) |
| 801 | C(42)-C(44)  | 1.445(5) |
| 802 | C(43)-N(3)   | 1.358(5) |
| 803 | C(43)-C(48)  | 1.466(5) |
| 804 | C(44)-O(4)   | 1.230(4) |
| 805 | C(44)-C(45)  | 1.517(6) |
| 806 | C(45)-F(6)   | 1.337(5) |
| 807 | C(45)-F(7)   | 1.345(5) |
| 808 | C(45)-F(8)   | 1.347(5) |
| 809 | C(48)-C(53)  | 1.377(5) |
| 810 | C(48)-C(49)  | 1.402(5) |
| 811 | C(49)-C(50)  | 1.363(5) |
| 812 | C(49)-H(49)  | 0.9500   |
| 813 | C(50)-C(51)  | 1.394(5) |
| 814 | C(50)-H(50)  | 0.9500   |
| 815 | C(51)-O(6)   | 1.364(4) |
| 816 | C(51)-C(52)  | 1.379(5) |
| 817 | C(52)-C(53)  | 1.381(5) |
| 818 | C(52)-H(52)  | 0.9500   |
| 819 | C(53)-H(53)  | 0.9500   |
| 820 | C(54)-O(6)   | 1.410(5) |
| 821 | C(54)-H(54A) | 0.9800   |
| 822 | C(54)-H(54B) | 0.9800   |
| 823 | C(54)-H(54C) | 0.9800   |
| 824 | C(55)-O(5)   | 1.205(4) |
| 825 | C(55)-N(4)   | 1.366(5) |
| 826 | C(55)-C(56)  | 1.509(5) |
| 827 | C(56)-H(56A) | 0.9800   |

|     |                   |          |
|-----|-------------------|----------|
| 828 | C(56)-H(56B)      | 0.9800   |
| 829 | C(56)-H(56C)      | 0.9800   |
| 830 | N(3)-H(3)         | 0.8800   |
| 831 | N(4)-H(4)         | 0.8800   |
| 832 | C(2)-C(1)-C(6)    | 122.3(4) |
| 833 | C(2)-C(1)-F(1)    | 117.9(4) |
| 834 | C(6)-C(1)-F(1)    | 119.8(4) |
| 835 | C(1)-C(2)-C(3)    | 118.0(4) |
| 836 | C(1)-C(2)-H(2A)   | 121.0    |
| 837 | C(3)-C(2)-H(2A)   | 121.0    |
| 838 | C(4)-C(3)-C(2)    | 122.2(4) |
| 839 | C(4)-C(3)-H(3A)   | 118.9    |
| 840 | C(2)-C(3)-H(3A)   | 118.9    |
| 841 | C(3)-C(4)-C(5)    | 116.7(4) |
| 842 | C(3)-C(4)-C(7)    | 120.7(4) |
| 843 | C(5)-C(4)-C(7)    | 122.7(4) |
| 844 | C(6)-C(5)-C(4)    | 122.0(4) |
| 845 | C(6)-C(5)-H(5)    | 119.0    |
| 846 | C(4)-C(5)-H(5)    | 119.0    |
| 847 | C(1)-C(6)-C(5)    | 118.8(4) |
| 848 | C(1)-C(6)-H(6)    | 120.6    |
| 849 | C(5)-C(6)-H(6)    | 120.6    |
| 850 | C(8)-C(7)-C(4)    | 128.6(4) |
| 851 | C(8)-C(7)-H(7)    | 115.7    |
| 852 | C(4)-C(7)-H(7)    | 115.7    |
| 853 | C(7)-C(8)-C(9)    | 127.9(4) |
| 854 | C(7)-C(8)-H(8)    | 116.0    |
| 855 | C(9)-C(8)-H(8)    | 116.0    |
| 856 | C(10)-C(9)-C(14)  | 120.8(3) |
| 857 | C(10)-C(9)-C(8)   | 121.3(3) |
| 858 | C(14)-C(9)-C(8)   | 117.8(3) |
| 859 | C(9)-C(10)-C(11)  | 117.6(3) |
| 860 | C(9)-C(10)-H(10)  | 121.2    |
| 861 | C(11)-C(10)-H(10) | 121.2    |
| 862 | C(12)-C(11)-C(10) | 120.1(3) |
| 863 | C(12)-C(11)-C(15) | 107.0(3) |
| 864 | C(10)-C(11)-C(15) | 132.9(3) |
| 865 | N(1)-C(12)-C(13)  | 128.9(3) |
| 866 | N(1)-C(12)-C(11)  | 108.4(3) |

|     |                   |          |
|-----|-------------------|----------|
| 867 | C(13)-C(12)-C(11) | 122.6(3) |
| 868 | C(14)-C(13)-C(12) | 116.7(3) |
| 869 | C(14)-C(13)-N(2)  | 125.0(3) |
| 870 | C(12)-C(13)-N(2)  | 118.2(3) |
| 871 | C(13)-C(14)-C(9)  | 122.2(3) |
| 872 | C(13)-C(14)-H(14) | 118.9    |
| 873 | C(9)-C(14)-H(14)  | 118.9    |
| 874 | C(16)-C(15)-C(11) | 106.4(3) |
| 875 | C(16)-C(15)-C(17) | 132.8(3) |
| 876 | C(11)-C(15)-C(17) | 120.5(3) |
| 877 | N(1)-C(16)-C(15)  | 108.8(3) |
| 878 | N(1)-C(16)-C(19)  | 117.4(3) |
| 879 | C(15)-C(16)-C(19) | 133.7(3) |
| 880 | O(1)-C(17)-C(15)  | 122.7(3) |
| 881 | O(1)-C(17)-C(18)  | 114.1(3) |
| 882 | C(15)-C(17)-C(18) | 123.1(3) |
| 883 | F(4)-C(18)-F(2)   | 108.0(3) |
| 884 | F(4)-C(18)-F(3)   | 106.3(3) |
| 885 | F(2)-C(18)-F(3)   | 106.9(3) |
| 886 | F(4)-C(18)-C(17)  | 110.6(3) |
| 887 | F(2)-C(18)-C(17)  | 115.0(3) |
| 888 | F(3)-C(18)-C(17)  | 109.7(3) |
| 889 | C(20)-C(19)-C(24) | 117.0(3) |
| 890 | C(20)-C(19)-C(16) | 121.4(3) |
| 891 | C(24)-C(19)-C(16) | 121.5(3) |
| 892 | C(21)-C(20)-C(19) | 121.2(3) |
| 893 | C(21)-C(20)-H(20) | 119.4    |
| 894 | C(19)-C(20)-H(20) | 119.4    |
| 895 | C(20)-C(21)-C(22) | 120.6(3) |
| 896 | C(20)-C(21)-H(21) | 119.7    |
| 897 | C(22)-C(21)-H(21) | 119.7    |
| 898 | O(3)-C(22)-C(23)  | 125.2(3) |
| 899 | O(3)-C(22)-C(21)  | 115.1(3) |
| 900 | C(23)-C(22)-C(21) | 119.7(3) |
| 901 | C(22)-C(23)-C(24) | 119.2(3) |
| 902 | C(22)-C(23)-H(23) | 120.4    |
| 903 | C(24)-C(23)-H(23) | 120.4    |
| 904 | C(23)-C(24)-C(19) | 122.2(4) |
| 905 | C(23)-C(24)-H(24) | 118.9    |

|     |                     |          |
|-----|---------------------|----------|
| 906 | C(19)-C(24)-H(24)   | 118.9    |
| 907 | O(3)-C(25)-H(25A)   | 109.5    |
| 908 | O(3)-C(25)-H(25B)   | 109.5    |
| 909 | H(25A)-C(25)-H(25B) | 109.5    |
| 910 | O(3)-C(25)-H(25C)   | 109.5    |
| 911 | H(25A)-C(25)-H(25C) | 109.5    |
| 912 | H(25B)-C(25)-H(25C) | 109.5    |
| 913 | O(2)-C(26)-N(2)     | 124.1(4) |
| 914 | O(2)-C(26)-C(27)    | 123.2(4) |
| 915 | N(2)-C(26)-C(27)    | 112.7(4) |
| 916 | C(16)-N(1)-C(12)    | 109.3(3) |
| 917 | C(16)-N(1)-H(1)     | 125.3    |
| 918 | C(12)-N(1)-H(1)     | 125.3    |
| 919 | C(26)-N(2)-C(13)    | 127.6(3) |
| 920 | C(26)-N(2)-H(2)     | 116.2    |
| 921 | C(13)-N(2)-H(2)     | 116.2    |
| 922 | C(22)-O(3)-C(25)    | 117.5(3) |
| 923 | C(26)-C(27)-H(27A)  | 109.5    |
| 924 | C(26)-C(27)-H(27B)  | 109.5    |
| 925 | H(27A)-C(27)-H(27B) | 109.5    |
| 926 | C(26)-C(27)-H(27C)  | 109.5    |
| 927 | H(27A)-C(27)-H(27C) | 109.5    |
| 928 | H(27B)-C(27)-H(27C) | 109.5    |
| 929 | C(33)-C(28)-C(29)   | 123.0(4) |
| 930 | C(33)-C(28)-F(5)    | 118.5(4) |
| 931 | C(29)-C(28)-F(5)    | 118.5(3) |
| 932 | C(28)-C(29)-C(30)   | 118.6(4) |
| 933 | C(28)-C(29)-H(29)   | 120.7    |
| 934 | C(30)-C(29)-H(29)   | 120.7    |
| 935 | C(29)-C(30)-C(31)   | 121.6(4) |
| 936 | C(29)-C(30)-H(30)   | 119.2    |
| 937 | C(31)-C(30)-H(30)   | 119.2    |
| 938 | C(30)-C(31)-C(32)   | 117.4(3) |
| 939 | C(30)-C(31)-C(34)   | 123.3(3) |
| 940 | C(32)-C(31)-C(34)   | 119.3(3) |
| 941 | C(33)-C(32)-C(31)   | 121.0(4) |
| 942 | C(33)-C(32)-H(32)   | 119.5    |
| 943 | C(31)-C(32)-H(32)   | 119.5    |
| 944 | C(28)-C(33)-C(32)   | 118.4(4) |

|     |                   |          |
|-----|-------------------|----------|
| 945 | C(28)-C(33)-H(33) | 120.8    |
| 946 | C(32)-C(33)-H(33) | 120.8    |
| 947 | C(35)-C(34)-C(31) | 125.7(3) |
| 948 | C(35)-C(34)-H(34) | 117.2    |
| 949 | C(31)-C(34)-H(34) | 117.2    |
| 950 | C(34)-C(35)-C(36) | 126.7(4) |
| 951 | C(34)-C(35)-H(35) | 116.7    |
| 952 | C(36)-C(35)-H(35) | 116.7    |
| 953 | C(37)-C(36)-C(41) | 120.2(3) |
| 954 | C(37)-C(36)-C(35) | 117.9(3) |
| 955 | C(41)-C(36)-C(35) | 121.9(3) |
| 956 | C(38)-C(37)-C(36) | 119.5(3) |
| 957 | C(38)-C(37)-H(37) | 120.3    |
| 958 | C(36)-C(37)-H(37) | 120.3    |
| 959 | C(37)-C(38)-C(39) | 119.1(3) |
| 960 | C(37)-C(38)-C(42) | 133.8(3) |
| 961 | C(39)-C(38)-C(42) | 106.8(3) |
| 962 | N(3)-C(39)-C(40)  | 130.0(3) |
| 963 | N(3)-C(39)-C(38)  | 107.3(3) |
| 964 | C(40)-C(39)-C(38) | 122.6(3) |
| 965 | C(41)-C(40)-C(39) | 117.7(3) |
| 966 | C(41)-C(40)-N(4)  | 124.0(3) |
| 967 | C(39)-C(40)-N(4)  | 118.3(3) |
| 968 | C(40)-C(41)-C(36) | 121.0(3) |
| 969 | C(40)-C(41)-H(41) | 119.5    |
| 970 | C(36)-C(41)-H(41) | 119.5    |
| 971 | C(43)-C(42)-C(44) | 133.3(3) |
| 972 | C(43)-C(42)-C(38) | 106.4(3) |
| 973 | C(44)-C(42)-C(38) | 120.2(3) |
| 974 | N(3)-C(43)-C(42)  | 108.6(3) |
| 975 | N(3)-C(43)-C(48)  | 119.1(3) |
| 976 | C(42)-C(43)-C(48) | 132.2(3) |
| 977 | O(4)-C(44)-C(42)  | 124.1(4) |
| 978 | O(4)-C(44)-C(45)  | 112.9(3) |
| 979 | C(42)-C(44)-C(45) | 123.0(3) |
| 980 | F(6)-C(45)-F(7)   | 106.4(3) |
| 981 | F(6)-C(45)-F(8)   | 106.0(4) |
| 982 | F(7)-C(45)-F(8)   | 107.2(3) |
| 983 | F(6)-C(45)-C(44)  | 109.8(3) |

|      |                     |          |
|------|---------------------|----------|
| 984  | F(7)-C(45)-C(44)    | 111.1(4) |
| 985  | F(8)-C(45)-C(44)    | 115.8(3) |
| 986  | C(53)-C(48)-C(49)   | 117.6(3) |
| 987  | C(53)-C(48)-C(43)   | 121.8(3) |
| 988  | C(49)-C(48)-C(43)   | 120.6(3) |
| 989  | C(50)-C(49)-C(48)   | 120.7(3) |
| 990  | C(50)-C(49)-H(49)   | 119.6    |
| 991  | C(48)-C(49)-H(49)   | 119.6    |
| 992  | C(49)-C(50)-C(51)   | 121.0(4) |
| 993  | C(49)-C(50)-H(50)   | 119.5    |
| 994  | C(51)-C(50)-H(50)   | 119.5    |
| 995  | O(6)-C(51)-C(52)    | 125.6(3) |
| 996  | O(6)-C(51)-C(50)    | 115.5(3) |
| 997  | C(52)-C(51)-C(50)   | 118.8(3) |
| 998  | C(51)-C(52)-C(53)   | 119.7(4) |
| 999  | C(51)-C(52)-H(52)   | 120.1    |
| 1000 | C(53)-C(52)-H(52)   | 120.1    |
| 1001 | C(48)-C(53)-C(52)   | 122.1(3) |
| 1002 | C(48)-C(53)-H(53)   | 118.9    |
| 1003 | C(52)-C(53)-H(53)   | 118.9    |
| 1004 | O(6)-C(54)-H(54A)   | 109.5    |
| 1005 | O(6)-C(54)-H(54B)   | 109.5    |
| 1006 | H(54A)-C(54)-H(54B) | 109.5    |
| 1007 | O(6)-C(54)-H(54C)   | 109.5    |
| 1008 | H(54A)-C(54)-H(54C) | 109.5    |
| 1009 | H(54B)-C(54)-H(54C) | 109.5    |
| 1010 | O(5)-C(55)-N(4)     | 124.2(3) |
| 1011 | O(5)-C(55)-C(56)    | 122.2(3) |
| 1012 | N(4)-C(55)-C(56)    | 113.5(3) |
| 1013 | C(55)-C(56)-H(56A)  | 109.5    |
| 1014 | C(55)-C(56)-H(56B)  | 109.5    |
| 1015 | H(56A)-C(56)-H(56B) | 109.5    |
| 1016 | C(55)-C(56)-H(56C)  | 109.5    |
| 1017 | H(56A)-C(56)-H(56C) | 109.5    |
| 1018 | H(56B)-C(56)-H(56C) | 109.5    |
| 1019 | C(43)-N(3)-C(39)    | 110.7(3) |
| 1020 | C(43)-N(3)-H(3)     | 124.6    |
| 1021 | C(39)-N(3)-H(3)     | 124.6    |
| 1022 | C(55)-N(4)-C(40)    | 127.8(3) |



|      |                  |          |
|------|------------------|----------|
| 1023 | C(55)-N(4)-H(4)  | 116.1    |
| 1024 | C(40)-N(4)-H(4)  | 116.1    |
| 1025 | C(51)-O(6)-C(54) | 117.9(3) |

1026

---

1027 Symmetry transformations used to generate equivalent atoms:

1028

1029

1030 **Table 24. Torsion angles [°] for 4g**

| 1031 |                         |           |
|------|-------------------------|-----------|
| 1032 | C(6)-C(1)-C(2)-C(3)     | -2.7(9)   |
| 1033 | F(1)-C(1)-C(2)-C(3)     | -179.9(5) |
| 1034 | C(1)-C(2)-C(3)-C(4)     | -0.7(10)  |
| 1035 | C(2)-C(3)-C(4)-C(5)     | 3.4(9)    |
| 1036 | C(2)-C(3)-C(4)-C(7)     | -176.7(6) |
| 1037 | C(3)-C(4)-C(5)-C(6)     | -3.0(7)   |
| 1038 | C(7)-C(4)-C(5)-C(6)     | 177.1(4)  |
| 1039 | C(2)-C(1)-C(6)-C(5)     | 3.1(8)    |
| 1040 | F(1)-C(1)-C(6)-C(5)     | -179.8(4) |
| 1041 | C(4)-C(5)-C(6)-C(1)     | -0.1(7)   |
| 1042 | C(3)-C(4)-C(7)-C(8)     | 171.2(6)  |
| 1043 | C(5)-C(4)-C(7)-C(8)     | -9.0(8)   |
| 1044 | C(4)-C(7)-C(8)-C(9)     | -177.6(4) |
| 1045 | C(7)-C(8)-C(9)-C(10)    | 3.4(7)    |
| 1046 | C(7)-C(8)-C(9)-C(14)    | -177.6(4) |
| 1047 | C(14)-C(9)-C(10)-C(11)  | 0.3(6)    |
| 1048 | C(8)-C(9)-C(10)-C(11)   | 179.3(4)  |
| 1049 | C(9)-C(10)-C(11)-C(12)  | 0.2(6)    |
| 1050 | C(9)-C(10)-C(11)-C(15)  | -177.6(4) |
| 1051 | C(10)-C(11)-C(12)-N(1)  | 178.6(3)  |
| 1052 | C(15)-C(11)-C(12)-N(1)  | -3.2(4)   |
| 1053 | C(10)-C(11)-C(12)-C(13) | -0.2(6)   |
| 1054 | C(15)-C(11)-C(12)-C(13) | 178.1(3)  |
| 1055 | N(1)-C(12)-C(13)-C(14)  | -178.7(4) |
| 1056 | C(11)-C(12)-C(13)-C(14) | -0.3(6)   |
| 1057 | N(1)-C(12)-C(13)-N(2)   | 0.6(6)    |
| 1058 | C(11)-C(12)-C(13)-N(2)  | 179.0(3)  |
| 1059 | C(12)-C(13)-C(14)-C(9)  | 0.7(6)    |
| 1060 | N(2)-C(13)-C(14)-C(9)   | -178.5(4) |
| 1061 | C(10)-C(9)-C(14)-C(13)  | -0.7(6)   |
| 1062 | C(8)-C(9)-C(14)-C(13)   | -179.8(4) |
| 1063 | C(12)-C(11)-C(15)-C(16) | 3.5(4)    |
| 1064 | C(10)-C(11)-C(15)-C(16) | -178.5(4) |
| 1065 | C(12)-C(11)-C(15)-C(17) | -171.6(3) |
| 1066 | C(10)-C(11)-C(15)-C(17) | 6.3(7)    |
| 1067 | C(11)-C(15)-C(16)-N(1)  | -2.6(4)   |
| 1068 | C(17)-C(15)-C(16)-N(1)  | 171.7(4)  |

|      |                         |           |
|------|-------------------------|-----------|
| 1069 | C(11)-C(15)-C(16)-C(19) | 173.8(4)  |
| 1070 | C(17)-C(15)-C(16)-C(19) | -11.9(7)  |
| 1071 | C(16)-C(15)-C(17)-O(1)  | 170.5(4)  |
| 1072 | C(11)-C(15)-C(17)-O(1)  | -15.9(6)  |
| 1073 | C(16)-C(15)-C(17)-C(18) | -12.3(7)  |
| 1074 | C(11)-C(15)-C(17)-C(18) | 161.3(3)  |
| 1075 | O(1)-C(17)-C(18)-F(4)   | 27.9(5)   |
| 1076 | C(15)-C(17)-C(18)-F(4)  | -149.5(3) |
| 1077 | O(1)-C(17)-C(18)-F(2)   | 150.4(4)  |
| 1078 | C(15)-C(17)-C(18)-F(2)  | -27.0(5)  |
| 1079 | O(1)-C(17)-C(18)-F(3)   | -89.1(4)  |
| 1080 | C(15)-C(17)-C(18)-F(3)  | 93.5(4)   |
| 1081 | N(1)-C(16)-C(19)-C(20)  | 133.3(4)  |
| 1082 | C(15)-C(16)-C(19)-C(20) | -42.9(6)  |
| 1083 | N(1)-C(16)-C(19)-C(24)  | -42.5(5)  |
| 1084 | C(15)-C(16)-C(19)-C(24) | 141.4(4)  |
| 1085 | C(24)-C(19)-C(20)-C(21) | -3.0(5)   |
| 1086 | C(16)-C(19)-C(20)-C(21) | -178.9(3) |
| 1087 | C(19)-C(20)-C(21)-C(22) | 1.4(6)    |
| 1088 | C(20)-C(21)-C(22)-O(3)  | 179.5(3)  |
| 1089 | C(20)-C(21)-C(22)-C(23) | 0.7(6)    |
| 1090 | O(3)-C(22)-C(23)-C(24)  | -179.7(3) |
| 1091 | C(21)-C(22)-C(23)-C(24) | -1.0(6)   |
| 1092 | C(22)-C(23)-C(24)-C(19) | -0.7(6)   |
| 1093 | C(20)-C(19)-C(24)-C(23) | 2.6(5)    |
| 1094 | C(16)-C(19)-C(24)-C(23) | 178.5(3)  |
| 1095 | C(15)-C(16)-N(1)-C(12)  | 0.7(4)    |
| 1096 | C(19)-C(16)-N(1)-C(12)  | -176.4(3) |
| 1097 | C(13)-C(12)-N(1)-C(16)  | -179.8(4) |
| 1098 | C(11)-C(12)-N(1)-C(16)  | 1.6(4)    |
| 1099 | O(2)-C(26)-N(2)-C(13)   | -1.5(7)   |
| 1100 | C(27)-C(26)-N(2)-C(13)  | 179.4(4)  |
| 1101 | C(14)-C(13)-N(2)-C(26)  | 2.6(7)    |
| 1102 | C(12)-C(13)-N(2)-C(26)  | -176.6(4) |
| 1103 | C(23)-C(22)-O(3)-C(25)  | -2.9(5)   |
| 1104 | C(21)-C(22)-O(3)-C(25)  | 178.4(3)  |
| 1105 | C(33)-C(28)-C(29)-C(30) | 1.2(6)    |
| 1106 | F(5)-C(28)-C(29)-C(30)  | -179.8(4) |
| 1107 | C(28)-C(29)-C(30)-C(31) | 0.9(6)    |

|      |                         |           |
|------|-------------------------|-----------|
| 1108 | C(29)-C(30)-C(31)-C(32) | -2.2(6)   |
| 1109 | C(29)-C(30)-C(31)-C(34) | 176.0(4)  |
| 1110 | C(30)-C(31)-C(32)-C(33) | 1.5(6)    |
| 1111 | C(34)-C(31)-C(32)-C(33) | -176.7(4) |
| 1112 | C(29)-C(28)-C(33)-C(32) | -1.8(7)   |
| 1113 | F(5)-C(28)-C(33)-C(32)  | 179.1(4)  |
| 1114 | C(31)-C(32)-C(33)-C(28) | 0.4(7)    |
| 1115 | C(30)-C(31)-C(34)-C(35) | -8.0(6)   |
| 1116 | C(32)-C(31)-C(34)-C(35) | 170.2(4)  |
| 1117 | C(31)-C(34)-C(35)-C(36) | -176.5(4) |
| 1118 | C(34)-C(35)-C(36)-C(37) | 164.9(4)  |
| 1119 | C(34)-C(35)-C(36)-C(41) | -14.5(6)  |
| 1120 | C(41)-C(36)-C(37)-C(38) | 0.0(6)    |
| 1121 | C(35)-C(36)-C(37)-C(38) | -179.4(3) |
| 1122 | C(36)-C(37)-C(38)-C(39) | -1.2(6)   |
| 1123 | C(36)-C(37)-C(38)-C(42) | -174.3(4) |
| 1124 | C(37)-C(38)-C(39)-N(3)  | -176.5(3) |
| 1125 | C(42)-C(38)-C(39)-N(3)  | -1.6(4)   |
| 1126 | C(37)-C(38)-C(39)-C(40) | 1.2(6)    |
| 1127 | C(42)-C(38)-C(39)-C(40) | 176.1(3)  |
| 1128 | N(3)-C(39)-C(40)-C(41)  | 177.1(4)  |
| 1129 | C(38)-C(39)-C(40)-C(41) | 0.0(6)    |
| 1130 | N(3)-C(39)-C(40)-N(4)   | -3.4(6)   |
| 1131 | C(38)-C(39)-C(40)-N(4)  | 179.5(4)  |
| 1132 | C(39)-C(40)-C(41)-C(36) | -1.2(6)   |
| 1133 | N(4)-C(40)-C(41)-C(36)  | 179.3(4)  |
| 1134 | C(37)-C(36)-C(41)-C(40) | 1.3(6)    |
| 1135 | C(35)-C(36)-C(41)-C(40) | -179.4(4) |
| 1136 | C(37)-C(38)-C(42)-C(43) | 175.8(4)  |
| 1137 | C(39)-C(38)-C(42)-C(43) | 2.0(4)    |
| 1138 | C(37)-C(38)-C(42)-C(44) | -1.0(7)   |
| 1139 | C(39)-C(38)-C(42)-C(44) | -174.7(4) |
| 1140 | C(44)-C(42)-C(43)-N(3)  | 174.4(4)  |
| 1141 | C(38)-C(42)-C(43)-N(3)  | -1.7(4)   |
| 1142 | C(44)-C(42)-C(43)-C(48) | -7.8(8)   |
| 1143 | C(38)-C(42)-C(43)-C(48) | 176.0(4)  |
| 1144 | C(43)-C(42)-C(44)-O(4)  | 161.5(4)  |
| 1145 | C(38)-C(42)-C(44)-O(4)  | -22.8(6)  |
| 1146 | C(43)-C(42)-C(44)-C(45) | -21.3(7)  |

|      |                         |           |
|------|-------------------------|-----------|
| 1147 | C(38)-C(42)-C(44)-C(45) | 154.4(4)  |
| 1148 | O(4)-C(44)-C(45)-F(6)   | 39.4(5)   |
| 1149 | C(42)-C(44)-C(45)-F(6)  | -138.0(4) |
| 1150 | O(4)-C(44)-C(45)-F(7)   | -77.9(5)  |
| 1151 | C(42)-C(44)-C(45)-F(7)  | 104.6(4)  |
| 1152 | O(4)-C(44)-C(45)-F(8)   | 159.4(4)  |
| 1153 | C(42)-C(44)-C(45)-F(8)  | -18.1(6)  |
| 1154 | N(3)-C(43)-C(48)-C(53)  | -45.7(5)  |
| 1155 | C(42)-C(43)-C(48)-C(53) | 136.7(4)  |
| 1156 | N(3)-C(43)-C(48)-C(49)  | 134.4(4)  |
| 1157 | C(42)-C(43)-C(48)-C(49) | -43.1(6)  |
| 1158 | C(53)-C(48)-C(49)-C(50) | -0.8(5)   |
| 1159 | C(43)-C(48)-C(49)-C(50) | 179.1(4)  |
| 1160 | C(48)-C(49)-C(50)-C(51) | -0.1(6)   |
| 1161 | C(49)-C(50)-C(51)-O(6)  | -178.1(4) |
| 1162 | C(49)-C(50)-C(51)-C(52) | 1.4(6)    |
| 1163 | O(6)-C(51)-C(52)-C(53)  | 177.8(4)  |
| 1164 | C(50)-C(51)-C(52)-C(53) | -1.7(6)   |
| 1165 | C(49)-C(48)-C(53)-C(52) | 0.5(6)    |
| 1166 | C(43)-C(48)-C(53)-C(52) | -179.4(4) |
| 1167 | C(51)-C(52)-C(53)-C(48) | 0.7(6)    |
| 1168 | C(42)-C(43)-N(3)-C(39)  | 0.7(4)    |
| 1169 | C(48)-C(43)-N(3)-C(39)  | -177.3(3) |
| 1170 | C(40)-C(39)-N(3)-C(43)  | -176.9(4) |
| 1171 | C(38)-C(39)-N(3)-C(43)  | 0.6(4)    |
| 1172 | O(5)-C(55)-N(4)-C(40)   | -2.6(6)   |
| 1173 | C(56)-C(55)-N(4)-C(40)  | 178.0(4)  |
| 1174 | C(41)-C(40)-N(4)-C(55)  | -4.7(6)   |
| 1175 | C(39)-C(40)-N(4)-C(55)  | 175.8(4)  |
| 1176 | C(52)-C(51)-O(6)-C(54)  | 6.4(7)    |
| 1177 | C(50)-C(51)-O(6)-C(54)  | -174.1(4) |

1178

1179 Symmetry transformations used to generate equivalent atoms:

1180

1181

1182
